# Supplementary material for: Manganese(iii)-promoted highly stereoselective phosphorylation of acyclic tertiary enamides to synthesize E-selective β-phosphoryl enamides
Source: Royal Society of Chemistry journal article supplement (doi:10.1039/d2ob00980c), 2022-01-01

## Supporting Information

### **Manganese(III)-Promoted Highly Stereoselective Phosphorylation of Acyclic Tertiary Enamides to Synthesize *E*-Selective $\beta$ -Phosphoryl Enamides**

Xin-Ming Xu<sup>a,\*</sup>, Wenzhong Li<sup>a</sup>, Qiwei Li<sup>a</sup>, Sen Chen<sup>a</sup>, Xuesi Zhang<sup>a</sup>, Bin Yang<sup>a</sup>,

Wei-Li Wang<sup>b</sup>

<sup>a</sup> College of Chemistry and Chemical Engineering, Yantai University, Yantai 264005, China

<sup>b</sup> School of Chemistry and Material Science, Ludong University, Yantai 264005, China

Email: xin\_mingxu@163.com

## Table of Contents

|                                                                                                     |     |
|-----------------------------------------------------------------------------------------------------|-----|
| 1. General Information .....                                                                        | S3  |
| 2. Scope of the $\beta$ -Phosphorylation Reactions .....                                            | S3  |
| 2.1. General Procedure for the Synthesis of <b>3</b> .....                                          | S3  |
| 2.2. Characterization of <b>3</b> .....                                                             | S3  |
| 3. Applications of the $\beta$ -Phosphorylation Reaction .....                                      | S18 |
| 3.1. Gram-Scale Synthesis of Compound <b>3aa</b> .....                                              | S18 |
| 3.2. Chemical Transformation of Compound <b>3aa</b> .....                                           | S19 |
| 4. Control Experiments .....                                                                        | S19 |
| 4.1. Reaction with Radical Trapping Agents TEMPO or BHT .....                                       | S19 |
| 4.2. Reaction with 1,1-Diphenylethylene .....                                                       | S20 |
| 5. References .....                                                                                 | S20 |
| 6. Crystallographic Data .....                                                                      | S21 |
| 7. Copies of $^1\text{H}$ , $^{13}\text{C}$ , $^{19}\text{F}$ and $^{31}\text{P}$ NMR Spectra ..... | S22 |

## 1. General information

All chemicals were dried or purified according to standard procedures prior to use. Flash column chromatography was performed on silica gel (100-200). Reactions were monitored using pre-coated, glass-backed silica gel plates and visualized by means of UV irradiation (254 nm) or KMnO<sub>4</sub>, phosphomolybdic acid, ninhydrine, pancaldi, and *p*-anisaldehyde vanillin. <sup>1</sup>H NMR, <sup>13</sup>C NMR, <sup>19</sup>F NMR and <sup>31</sup>P NMR spectra were recorded using 500 MHz spectrometers at ambient temperature. Chemical shifts are reported in ppm with either tetramethylsilane or the residual solvent resonance used as an internal standard. Abbreviations are used in the description of NMR data as follows: chemical shift ( $\delta$ , ppm), multiplicity (s = singlet, d = doublet, t = triplet, m = multiplet), coupling constant (*J*, Hz). Mass spectra was measured on Bruker APEX-2 (HRMS) using GCT-MS spectrometer. All yields reported were isolated yields. All acyclic tertiary enamides are known compounds and prepared according to the reported literature procedures.<sup>[1]</sup>

## 2. Scope of the $\beta$ -Phosphorylation Reactions

### 2.1 General Procedure for the Synthesis of **3**

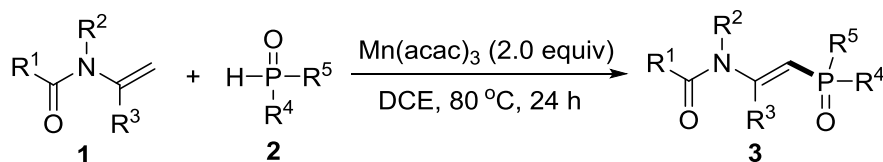

To a Schlenk tube (10 mL) equipped with a magnetic stirrer were added **1** (0.5 mmol), **2** (1.0 mmol), Mn(acac)<sub>3</sub> (1.0 mmol) and dry DCE (5 mL). The reaction mixture was stirred at 80 °C for 24 h and then NaHCO<sub>3</sub> aqueous (10%) solution (20 mL) was added to quench the reaction. The mixture was extracted with ethyl acetate (3  $\times$  20 mL), and combined organic layer was washed with brine (50 mL) and dried over anhydrous Na<sub>2</sub>SO<sub>4</sub>. The solvents were removed in *vacuo* and the residue was purified by flash column chromatography (PE : EA = 1 : 1) to afford products **3**.

### 2.2. Characterization of **3**

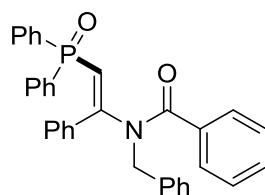

**(E)-N-benzyl-N-(2-(diphenylphosphoryl)-1-phenylvinyl)benzamide (3aa)**

The title compound was synthesized following the general procedure and the residue was purified by flash chromatography on silica gel (PE : EA = 1 : 1). **3aa** was obtained as a white solid (200.2 mg, 78% yield). m.p. 172-174 °C; <sup>1</sup>H NMR (500 MHz, DMSO-*d*<sub>6</sub>) δ 7.59 (d, *J* = 7.2 Hz, 2H), 7.50-7.41 (m, 3H), 7.37-7.28 (m, 7H), 7.27-7.19 (m, 6H), 7.18-7.13 (m, 1H), 7.10-6.99 (m, 6H), 5.99 (dd, *J* = 13.8, 2.5 Hz, 1H), 4.82 (s, 2H); <sup>31</sup>P NMR (202 MHz, DMSO-*d*<sub>6</sub>) δ 15.68; <sup>13</sup>C NMR (126 MHz, DMSO-*d*<sub>6</sub>) δ 171.28, 156.73 (d, *J*<sub>C-P</sub> = 8.8 Hz), 136.60 (d, *J*<sub>C-P</sub> = 55.4 Hz), 134.42 (d, *J*<sub>C-P</sub> = 3.8 Hz), 134.07 (d, *J*<sub>C-P</sub> = 105.8 Hz), 130.98 (d, *J*<sub>C-P</sub> = 1.3 Hz), 130.46, 130.06, 129.99, 129.51, 128.45, 128.42, 128.19, 128.10, 128.01, 127.90, 127.75, 127.37, 118.59 (d, *J*<sub>C-P</sub> = 102.1 Hz), 50.90; HRMS (ESI) *m/z* [M+H]<sup>+</sup> Calcd. for C<sub>34</sub>H<sub>29</sub>NO<sub>2</sub>P 514.1930; Found 514.1924.

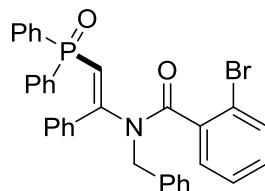

**(E)-N-benzyl-2-bromo-N-(2-(diphenylphosphoryl)-1-phenylvinyl)benzamide**

**(3ba)**

The title compound was synthesized following the general procedure and the residue was purified by flash chromatography on silica gel (PE : EA = 1 : 1). **3ba** was obtained as a white solid (183.2 mg, 62% yield). m.p. 184-185 °C; <sup>1</sup>H NMR (500 MHz, DMSO-*d*<sub>6</sub>) δ 7.52-7.48 (m, 2H), 7.43-7.32 (m, 8H), 7.32-7.23 (m, 7H), 7.19 (t, *J* = 7.4 Hz, 1H), 7.08 (t, *J* = 7.6 Hz, 6H), 6.15 (d, *J* = 14.4 Hz, 1H), 4.82 (br, 2H); <sup>31</sup>P NMR (202 MHz, DMSO-*d*<sub>6</sub>) δ 16.04; <sup>13</sup>C NMR (126 MHz, DMSO-*d*<sub>6</sub>) δ 168.31, 154.96 (d, *J*<sub>C-P</sub> = 6.3 Hz), 137.94, 136.39, 133.92 (d, *J*<sub>C-P</sub> = 3.8 Hz), 133.16, 131.24, 130.94, 130.19, 130.05, 129.97, 129.38, 128.62, 128.24, 127.83, 127.73 (d, *J*<sub>C-P</sub> =

12.6 Hz), 127.64, 120.40, 119.34 (d,  $J_{C-P} = 102.1$  Hz), 49.89; HRMS (ESI)  $m/z$   $[M+H]^+$  Calcd. for  $C_{34}H_{28}BrNO_2P$  592.1036, 594.1015; Found 592.1029, 594.1009.

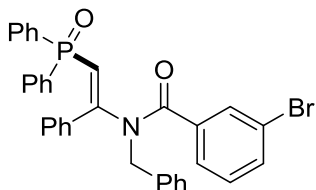

**(E)-N-benzyl-3-bromo-N-(2-(diphenylphosphoryl)-1-phenylvinyl)benzamide**

**(3ca)**

The title compound was synthesized following the general procedure and the residue was purified by flash chromatography on silica gel (PE : EA = 1 : 1). **3ca** was obtained as a white solid (198.0 mg, 67% yield). m.p. 93-95 °C;  $^1H$  NMR (500 MHz,  $DMSO-d_6$ )  $\delta$  7.78 (t,  $J = 1.8$  Hz, 1H), 7.67-7.62 (m, 1H), 7.57 (dt,  $J = 7.7, 1.3$  Hz, 1H), 7.39-7.30 (m, 8H), 7.28-7.21 (m, 6H), 7.21-7.17 (m, 1H), 7.12-7.04 (m, 6H), 6.10 (d,  $J = 13.8$  Hz, 1H), 4.78 (s, 2H);  $^{31}P$  NMR (202 MHz,  $DMSO-d_6$ )  $\delta$  15.83;  $^{13}C$  NMR (126 MHz,  $DMSO-d_6$ )  $\delta$  169.59, 156.00 (d,  $J_{C-P} = 8.8$  Hz), 138.61, 136.50, 134.10 (d,  $J_{C-P} = 3.8$  Hz), 133.99 (d,  $J_{C-P} = 104.6$  Hz), 133.04, 131.07 (d,  $J_{C-P} = 1.3$  Hz), 130.56 (d,  $J_{C-P} = 8.8$  Hz), 130.11, 130.03, 129.96, 129.59, 128.43, 128.26, 128.19 (d,  $J_{C-P} = 11.3$  Hz), 127.82, 127.02 (d,  $J_{C-P} = 94.5$  Hz), 121.73, 119.11 (d,  $J_{C-P} = 102.1$  Hz), 50.72; HRMS (ESI)  $m/z$   $[M+H]^+$  Calcd. for  $C_{34}H_{28}BrNO_2P$  592.1036, 594.1015; Found 592.1031, 594.1010.

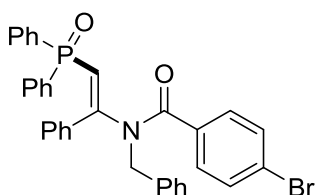

**(E)-N-benzyl-4-bromo-N-(2-(diphenylphosphoryl)-1-phenylvinyl)benzamide**

**(3da)**

The title compound was synthesized following the general procedure and the residue was purified by flash chromatography on silica gel (PE : EA = 1 : 1). **3da** was obtained as a white solid (195.1 mg, 66% yield). m.p. 181-182 °C;  $^1H$  NMR (500 MHz,  $DMSO-d_6$ )  $\delta$  7.57 (d,  $J = 8.4$  Hz, 2H), 7.50 (d,  $J = 8.5$  Hz, 2H), 7.39-7.32 (m, 7H), 7.29-7.23 (m, 6H), 7.20 (t,  $J = 7.4$  Hz, 1H), 7.12-7.06 (m, 6H), 6.03 (d,  $J = 14.0$

Hz, 1H), 4.81 (s, 2H);  $^{31}\text{P}$  NMR (202 MHz,  $\text{DMSO-}d_6$ )  $\delta$  16.00;  $^{13}\text{C}$  NMR (126 MHz,  $\text{DMSO-}d_6$ )  $\delta$  170.32, 156.00 (d,  $J_{\text{C-P}} = 7.6$  Hz), 136.04 (d,  $J_{\text{C-P}} = 149.9$  Hz), 134.18 (d,  $J_{\text{C-P}} = 3.8$  Hz), 134.00 (d,  $J_{\text{C-P}} = 107.1$  Hz), 131.31, 131.12 (d,  $J_{\text{C-P}} = 1.3$  Hz), 130.11, 130.08, 130.00, 129.86, 129.61, 128.46, 128.30, 128.14 (d,  $J_{\text{C-P}} = 11.3$  Hz), 127.77, 127.42, 123.94, 118.98 (d,  $J_{\text{C-P}} = 102.1$  Hz), 50.74; HRMS (ESI)  $m/z$   $[\text{M}+\text{H}]^+$  Calcd. for  $\text{C}_{34}\text{H}_{28}\text{BrNO}_2\text{P}$  592.1036, 594.1015; Found 592.1029, 594.1007.

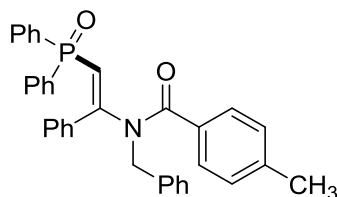

**(E)-N-benzyl-N-(2-(diphenylphosphoryl)-1-phenylvinyl)-4-methylbenzamide**

**(3ea)**

The title compound was synthesized following the general procedure and the residue was purified by flash chromatography on silica gel (PE : EA = 1 : 1). **3ea** was obtained as a white solid (187.2 mg, 71% yield). m.p. 175-177 °C;  $^1\text{H}$  NMR (500 MHz,  $\text{DMSO-}d_6$ )  $\delta$  7.50 (d,  $J = 7.8$  Hz, 2H), 7.40-7.28 (m, 8H), 7.25-7.19 (m, 8H), 7.12-7.02 (m, 6H), 5.92 (d,  $J = 13.9$  Hz, 1H), 4.78 (s, 2H), 2.33 (s, 3H);  $^{31}\text{P}$  NMR (202 MHz,  $\text{DMSO-}d_6$ )  $\delta$  15.70;  $^{13}\text{C}$  NMR (126 MHz,  $\text{DMSO-}d_6$ )  $\delta$  171.29, 156.71 (d,  $J_{\text{C-P}} = 8.8$  Hz), 140.51, 136.88, 134.30 (d,  $J_{\text{C-P}} = 5.0$  Hz), 134.13 (d,  $J_{\text{C-P}} = 105.8$  Hz), 133.35, 130.99 (d,  $J_{\text{C-P}} = 1.3$  Hz), 130.08, 130.04, 130.01, 129.53, 128.86, 128.42, 128.16, 128.06, 127.87 (d,  $J_{\text{C-P}} = 27.7$  Hz), 127.32, 118.62 (d,  $J_{\text{C-P}} = 102.1$  Hz), 50.76, 21.03; HRMS (ESI)  $m/z$   $[\text{M}+\text{Na}]^+$  Calcd. for  $\text{C}_{35}\text{H}_{30}\text{NO}_2\text{PNa}$  550.1906; Found 550.1911.

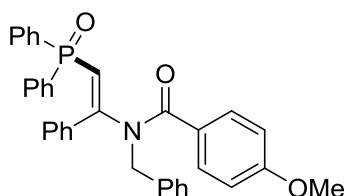

**(E)-N-benzyl-N-(2-(diphenylphosphoryl)-1-phenylvinyl)-4-methoxybenzamide**

**(3fa)**

The title compound was synthesized following the general procedure and the residue was purified by flash chromatography on silica gel (PE : EA = 1 : 1). **3fa** was

obtained as a light yellow oil (184.6 mg, 68% yield).  $^1\text{H}$  NMR (500 MHz, DMSO- $d_6$ )  $\delta$  7.55 (d,  $J$  = 8.8 Hz, 2H), 7.37–7.30 (m, 7H), 7.23 (ddd,  $J$  = 15.4, 8.4, 2.3 Hz, 6H), 7.17 (t,  $J$  = 7.3 Hz, 1H), 7.09 (td,  $J$  = 7.6, 3.4 Hz, 6H), 6.94 (d,  $J$  = 8.7 Hz, 2H), 5.92 (d,  $J$  = 13.9 Hz, 1H), 4.81 (s, 2H), 3.78 (s, 3H);  $^{31}\text{P}$  NMR (202 MHz, DMSO- $d_6$ )  $\delta$  15.86;  $^{13}\text{C}$  NMR (126 MHz, DMSO- $d_6$ )  $\delta$  171.09, 161.12, 157.05 (d,  $J_{\text{C-P}}$  = 7.6 Hz), 137.02, 134.54 (d,  $J_{\text{C-P}}$  = 3.8 Hz), 134.22 (d,  $J_{\text{C-P}}$  = 105.8 Hz), 130.99 (d,  $J_{\text{C-P}}$  = 1.3 Hz), 130.12, 130.07, 130.04, 129.97, 129.48, 128.43, 128.22, 128.05 (d,  $J_{\text{C-P}}$  = 11.3 Hz), 127.73, 127.33, 117.69 (d,  $J_{\text{C-P}}$  = 103.3 Hz), 113.60, 55.38, 51.02; HRMS (ESI)  $m/z$   $[\text{M}+\text{Na}]^+$  Calcd. for  $\text{C}_{35}\text{H}_{30}\text{NO}_3\text{PNa}$  566.1856; Found 566.1862.

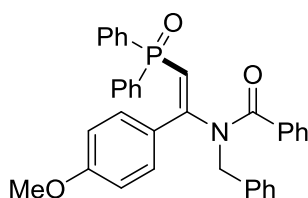

**(E)-N-benzyl-N-(2-(diphenylphosphoryl)-1-(4-methoxyphenyl)vinyl)benzamide (3ha)**

The title compound was synthesized following the general procedure and the residue was purified by flash chromatography on silica gel (PE : EA = 1 : 1). **3ha** was obtained as a white solid (195.6 mg, 72% yield). m.p. 170-172 °C;  $^1\text{H}$  NMR (500 MHz, DMSO- $d_6$ )  $\delta$  7.61 (d,  $J$  = 6.3 Hz, 2H), 7.51-7.43 (m, 3H), 7.39-7.29 (m, 7H), 7.28-7.20 (m, 6H), 7.04 (dd,  $J$  = 11.8, 7.6 Hz, 4H), 6.65 (d,  $J$  = 8.7 Hz, 2H), 5.81 (d,  $J$  = 13.9 Hz, 1H), 4.80 (s, 2H), 3.67 (s, 3H);  $^{31}\text{P}$  NMR (202 MHz, Chloroform- $d$ )  $\delta$  15.81;  $^{13}\text{C}$  NMR (126 MHz, DMSO- $d_6$ )  $\delta$  171.23, 160.67, 156.46 (d,  $J_{\text{C-P}}$  = 8.8 Hz), 136.65 (d,  $J_{\text{C-P}}$  = 55.4 Hz), 134.19 (d,  $J_{\text{C-P}}$  = 107.1 Hz), 131.24, 130.94, 130.44, 130.10, 130.03, 128.42, 128.20, 128.08, 127.98, 127.83, 127.33, 126.55 (d,  $J_{\text{C-P}}$  = 2.5 Hz), 117.49 (d,  $J_{\text{C-P}}$  = 103.3 Hz), 113.31, 55.22, 50.86; HRMS (ESI)  $m/z$   $[\text{M}+\text{Na}]^+$  Calcd. for  $\text{C}_{35}\text{H}_{30}\text{NO}_3\text{PNa}$  566.1856; Found 566.1859.

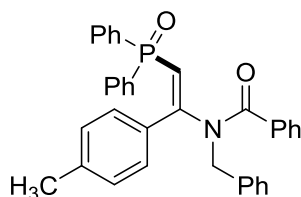

**(E)-N-benzyl-N-(2-(diphenylphosphoryl)-1-(p-tolyl)vinyl)benzamide (3ia)**

The title compound was synthesized following the general procedure and the residue was purified by flash chromatography on silica gel (PE : EA = 1 : 1). **3ia** was obtained as a white solid (203.0 mg, 77% yield). m.p. 166-168 °C; <sup>1</sup>H NMR (500 MHz, Chloroform-*d*) δ 7.63-7.58 (m, 2H), 7.39-7.35 (m, 2H), 7.34-7.24 (m, 10H), 7.14 (td, *J* = 7.7, 3.1 Hz, 4H), 7.11-7.05 (m, 4H), 6.95 (d, *J* = 7.9 Hz, 2H), 5.58 (d, *J* = 14.3 Hz, 1H), 4.82 (s, 2H), 2.25 (s, 3H); <sup>31</sup>P NMR (202 MHz, Chloroform-*d*) δ 17.60; <sup>13</sup>C NMR (126 MHz, Chloroform-*d*) δ 171.83, 157.25 (d, *J*<sub>C-P</sub> = 7.6 Hz), 140.93, 136.59 (d, *J*<sub>C-P</sub> = 103.3 Hz), 133.75 (d, *J*<sub>C-P</sub> = 108.4 Hz), 131.34 (d, *J*<sub>C-P</sub> = 3.8 Hz), 131.04 (d, *J*<sub>C-P</sub> = 2.5 Hz), 130.84, 130.76, 130.60, 130.11, 129.05, 128.98, 128.68, 128.42 (d, *J*<sub>C-P</sub> = 16.4 Hz), 128.11, 128.01, 127.74, 118.98 (d, *J*<sub>C-P</sub> = 103.3 Hz), 51.48, 21.45; HRMS (ESI) *m/z* [M+H]<sup>+</sup> Calcd. for C<sub>35</sub>H<sub>31</sub>NO<sub>2</sub>P 528.2087; Found 528.2080.

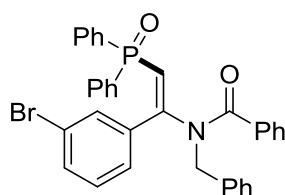

**(*E*)-*N*-benzyl-*N*-(1-(3-bromophenyl)-2-(diphenylphosphoryl)vinyl)benzamide**

**(3ja)**

The title compound was synthesized following the general procedure and the residue was purified by flash chromatography on silica gel (PE : EA = 1 : 1). **3ja** was obtained as a white solid (195.1 mg, 66% yield). m.p. 163-164 °C; <sup>1</sup>H NMR (500 MHz, DMSO-*d*<sub>6</sub>) δ 7.53 (d, *J* = 7.5 Hz, 2H), 7.48 (t, *J* = 7.3 Hz, 1H), 7.43 (t, *J* = 7.4 Hz, 2H), 7.40-7.32 (m, 6H), 7.31-7.22 (m, 7H), 7.20 (d, *J* = 7.8 Hz, 1H), 7.10 (dd, *J* = 11.9, 7.7 Hz, 4H), 6.97 (t, *J* = 7.9 Hz, 1H), 6.19 (d, *J* = 13.3 Hz, 1H), 4.91 (s, 2H); <sup>31</sup>P NMR (202 MHz, DMSO-*d*<sub>6</sub>) δ 15.64; <sup>13</sup>C NMR (126 MHz, DMSO-*d*<sub>6</sub>) δ 171.30, 155.15 (d, *J*<sub>C-P</sub> = 7.6 Hz), 137.00 (d, *J*<sub>C-P</sub> = 3.8 Hz), 136.54 (d, *J*<sub>C-P</sub> = 58.0 Hz), 133.78 (d, *J*<sub>C-P</sub> = 107.1 Hz), 132.50 (d, *J*<sub>C-P</sub> = 21.4 Hz), 131.11 (d, *J*<sub>C-P</sub> = 2.5 Hz), 130.09 (d, *J*<sub>C-P</sub> = 113.4 Hz), 130.03, 129.95, 128.53, 128.43, 128.22, 128.16, 128.06, 127.86, 127.51 (d, *J*<sub>C-P</sub> = 7.6 Hz), 121.07, 118.89 (d, *J*<sub>C-P</sub> = 102.1 Hz), 51.15; HRMS



(ESI)  $m/z$   $[M+Na]^+$  Calcd. for  $C_{34}H_{27}BrNO_2PNa$  614.0855, 616.0835; Found 614.0851, 616.0830.

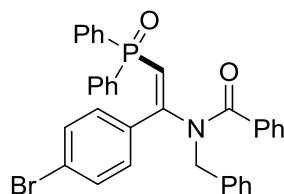

**(E)-N-benzyl-N-(1-(4-bromophenyl)-2-(diphenylphosphoryl)vinyl)benzamide**

**(3ka)**

The title compound was synthesized following the general procedure and the residue was purified by flash chromatography on silica gel (PE : EA = 1 : 1). **3ka** was obtained as a white solid (206.8 mg, 70% yield). m.p. 147-149 °C;  $^1H$  NMR (500 MHz,  $DMSO-d_6$ )  $\delta$  7.58-7.54 (m, 2H), 7.48-7.44 (m, 1H), 7.41 (dd,  $J = 8.0, 6.4$  Hz, 2H), 7.40-7.31 (m, 5H), 7.29-7.18 (m, 8H), 7.20 (d,  $J = 8.6$  Hz, 2H), 7.06 (dd,  $J = 11.9, 7.6$  Hz, 4H), 6.09 (d,  $J = 13.8$  Hz, 1H), 4.86 (s, 2H);  $^{31}P$  NMR (202 MHz,  $DMSO-d_6$ )  $\delta$  15.76;  $^{13}C$  NMR (126 MHz,  $DMSO-d_6$ )  $\delta$  171.26, 155.41 (d,  $J_{C-P} = 7.6$  Hz), 136.50 (d,  $J_{C-P} = 50.4$  Hz), 133.87 (d,  $J_{C-P} = 105.8$  Hz), 133.84 (d,  $J_{C-P} = 3.8$  Hz), 131.39, 131.10 (d,  $J_{C-P} = 1.3$  Hz), 130.63, 130.55, 130.13, 130.05, 128.51, 128.40, 128.23, 128.12 (d,  $J_{C-P} = 11.3$  Hz), 127.85, 127.44, 123.58, 118.84 (d,  $J_{C-P} = 102.1$  Hz), 50.88; HRMS (ESI)  $m/z$   $[M+Na]^+$  Calcd. for  $C_{34}H_{27}BrNO_2PNa$  614.0855, 616.0835; Found 614.0849, 616.0828.

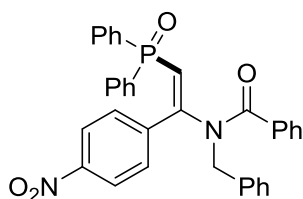

**(E)-N-benzyl-N-(2-(diphenylphosphoryl)-1-(4-nitrophenyl)vinyl)benzamide**

**(3la)**

The title compound was synthesized following the general procedure and the residue was purified by flash chromatography on silica gel (PE : EA = 1 : 1). **3la** was obtained as a white solid (125.6 mg, 45% yield). m.p. 119-121 °C;  $^1H$  NMR (500 MHz,  $DMSO-d_6$ )  $\delta$  7.87-7.82 (m, 2H), 7.55-7.52 (m, 2H), 7.46-7.41 (m, 3H), 7.40-7.34 (m, 7H), 7.33-7.30 (m, 2H), 7.25 (td,  $J = 7.7, 2.8$  Hz, 4H), 7.13-7.07 (m,

4H), 6.36 (d,  $J = 13.5$  Hz, 1H), 4.94 (s, 2H);  $^{31}\text{P}$  NMR (202 MHz,  $\text{DMSO-}d_6$ )  $\delta$  15.76;  $^{13}\text{C}$  NMR (126 MHz,  $\text{DMSO-}d_6$ )  $\delta$  171.28, 154.09 (d,  $J_{\text{C-P}} = 8.8$  Hz), 147.49, 141.36 (d,  $J_{\text{C-P}} = 3.8$  Hz), 136.35 (d,  $J_{\text{C-P}} = 49.1$  Hz), 133.59 (d,  $J_{\text{C-P}} = 107.1$  Hz), 131.27 (d,  $J_{\text{C-P}} = 2.5$  Hz), 130.84, 130.68, 130.19, 130.11, 128.61, 128.46, 128.32, 128.22 (d,  $J_{\text{C-P}} = 11.3$  Hz), 127.87, 127.58, 122.47, 120.11 (d,  $J_{\text{C-P}} = 100.8$  Hz), 50.97; HRMS (ESI)  $m/z$   $[\text{M}+\text{H}]^+$  Calcd. for  $\text{C}_{34}\text{H}_{28}\text{N}_2\text{O}_4\text{P}$  559.1781; Found 559.1786.

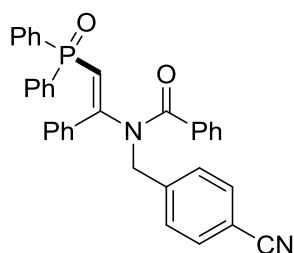

**(*E*)-*N*-(4-cyanobenzyl)-*N*-(2-(diphenylphosphoryl)-1-phenylvinyl)benzamide**

**(3na)**

The title compound was synthesized following the general procedure and the residue was purified by flash chromatography on silica gel (PE : EA = 1 : 1). **3na** was obtained as a white solid (188.4 mg, 70% yield). m.p. 107-108 °C;  $^1\text{H}$  NMR (500 MHz,  $\text{DMSO-}d_6$ )  $\delta$  7.78 (dd,  $J = 8.2, 3.8$  Hz, 2H), 7.72-7.65 (m, 2H), 7.57-7.49 (m, 3H), 7.41 (td,  $J = 8.4, 3.8$  Hz, 4H), 7.34 (dd,  $J = 7.7, 3.6$  Hz, 2H), 7.26-7.18 (m, 5H), 7.15-7.09 (m, 2H), 7.05-7.00 (m, 4H), 6.09 (dd,  $J = 13.5, 3.9$  Hz, 1H), 4.80 (s, 2H);  $^{31}\text{P}$  NMR (202 MHz,  $\text{DMSO-}d_6$ )  $\delta$  15.49;  $^{13}\text{C}$  NMR (126 MHz,  $\text{DMSO-}d_6$ )  $\delta$  171.24, 156.33 (d,  $J_{\text{C-P}} = 8.8$  Hz), 142.58, 135.93, 134.00 (d,  $J_{\text{C-P}} = 107.1$  Hz), 133.79 (d,  $J_{\text{C-P}} = 2.5$  Hz), 132.33, 131.04, 130.47 (d,  $J_{\text{C-P}} = 47.9$  Hz), 130.04, 129.96, 129.51, 128.89, 128.52, 128.14, 128.06 (d,  $J_{\text{C-P}} = 12.6$  Hz), 127.96, 119.77 (d,  $J_{\text{C-P}} = 100.8$  Hz), 118.75, 110.03, 50.49; HRMS (ESI)  $m/z$   $[\text{M}+\text{H}]^+$  Calcd. for  $\text{C}_{35}\text{H}_{28}\text{N}_2\text{O}_2\text{P}$  539.1883; Found 539.1876.

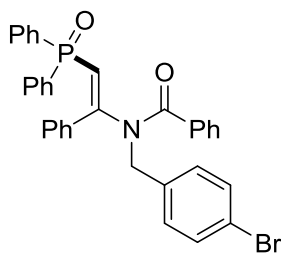

**(E)-N-(4-bromobenzyl)-N-(2-(diphenylphosphoryl)-1-phenylvinyl)benzamide**

**(30a)**

The title compound was synthesized following the general procedure and the residue was purified by flash chromatography on silica gel (PE : EA = 1 : 1). **30a** was obtained as a white solid (192.1 mg, 65% yield). m.p. 95-97 °C; <sup>1</sup>H NMR (500 MHz, DMSO-*d*<sub>6</sub>) δ 7.66-7.60 (m, 2H), 7.57-7.42 (m, 5H), 7.40-7.31 (m, 4H), 7.27-7.15 (m, 7H), 7.11 (t, *J* = 7.6 Hz, 2H), 7.06-6.98 (m, 4H), 5.99 (d, *J* = 13.7 Hz, 1H), 4.74 (s, 2H); <sup>31</sup>P NMR (202 MHz, DMSO-*d*<sub>6</sub>) δ 15.63; <sup>13</sup>C NMR (126 MHz, DMSO-*d*<sub>6</sub>) δ 171.23, 156.37 (d, *J*<sub>C-P</sub> = 7.6 Hz), 136.19, 136.13, 134.05 (d, *J*<sub>C-P</sub> = 3.8 Hz), 134.03 (d, *J*<sub>C-P</sub> = 105.8 Hz), 131.32, 131.03 (d, *J*<sub>C-P</sub> = 1.3 Hz), 130.47, 130.36 (d, *J*<sub>C-P</sub> = 49.1 Hz), 130.06, 129.98, 129.53, 128.46, 128.11, 128.01, 127.87, 120.50, 119.31 (d, *J*<sub>C-P</sub> = 102.1 Hz), 50.08; HRMS (ESI) *m/z* [M+H]<sup>+</sup> Calcd. for C<sub>34</sub>H<sub>28</sub>BrNO<sub>2</sub>P 592.1036, 594.1015; Found 592.1040, 594.1019.

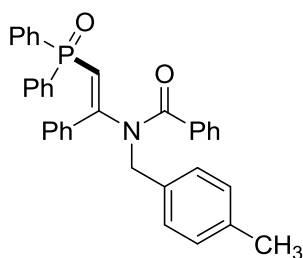

**(E)-N-(2-(diphenylphosphoryl)-1-phenylvinyl)-N-(4-methylbenzyl)benzamide**

**(3pa)**

The title compound was synthesized following the general procedure and the residue was purified by flash chromatography on silica gel (PE : EA = 1 : 1). **3pa** was obtained as a white solid (187.2 mg, 71% yield). m.p. 116-118 °C; <sup>1</sup>H NMR (500 MHz, DMSO-*d*<sub>6</sub>) δ 7.60-7.56 (m, 2H), 7.50-7.41 (m, 3H), 7.37-7.32 (m, 4H), 7.22 (td, *J* = 7.8, 2.8 Hz, 4H), 7.18-7.11 (m, 5H), 7.09-7.00 (m, 6H), 5.94 (d, *J* = 13.8 Hz,

1H), 4.76 (s, 2H), 2.30 (s, 3H);  $^{31}\text{P}$  NMR (202 MHz, DMSO- $d_6$ )  $\delta$  15.70;  $^{13}\text{C}$  NMR (126 MHz, DMSO- $d_6$ )  $\delta$  171.24, 156.69 (d,  $J_{\text{C-P}} = 7.6$  Hz), 136.49 (d,  $J_{\text{C-P}} = 10.1$  Hz), 134.45 (d,  $J_{\text{C-P}} = 3.8$  Hz), 134.07 (d,  $J_{\text{C-P}} = 105.8$  Hz), 133.74, 130.99 (d,  $J_{\text{C-P}} = 1.3$  Hz), 130.43, 130.07, 130.00, 129.52, 129.00, 128.41, 128.29, 128.08, 127.99, 127.88, 127.74, 118.58 (d,  $J_{\text{C-P}} = 102.1$  Hz), 50.59, 20.74; HRMS (ESI)  $m/z$   $[\text{M}+\text{H}]^+$  Calcd. for  $\text{C}_{35}\text{H}_{31}\text{NO}_2\text{P}$  528.2087; Found 528.2082.

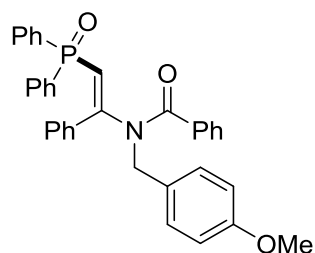

**(E)-N-(2-(diphenylphosphoryl)-1-phenylvinyl)-N-(4-methoxybenzyl)benzamide (3qa)**

The title compound was synthesized following the general procedure and the residue was purified by flash chromatography on silica gel (PE : EA = 1 : 1). **3qa** was obtained as a white solid (214.6 mg, 79% yield). m.p. 173-174 °C;  $^1\text{H}$  NMR (500 MHz, DMSO- $d_6$ )  $\delta$  7.60-7.55 (m, 2H), 7.47-7.40 (m, 3H), 7.38-7.31 (m, 4H), 7.22 (td,  $J = 7.7, 2.7$  Hz, 4H), 7.19-7.14 (m, 3H), 7.10-7.01 (m, 6H), 6.92-6.87 (m, 2H), 5.92 (d,  $J = 13.9$  Hz, 1H), 4.74 (s, 2H), 3.74 (s, 3H);  $^{31}\text{P}$  NMR (202 MHz, DMSO- $d_6$ )  $\delta$  15.84;  $^{13}\text{C}$  NMR (126 MHz, DMSO- $d_6$ )  $\delta$  171.26, 158.61, 156.73 (d,  $J_{\text{C-P}} = 8.8$  Hz), 136.48, 134.47, 133.63, 131.06 (d,  $J_{\text{C-P}} = 2.5$  Hz), 130.47, 130.12, 130.04, 129.76, 129.56, 128.70, 128.46, 128.14, 128.05, 127.86 (d,  $J_{\text{C-P}} = 11.3$  Hz), 118.71 (d,  $J_{\text{C-P}} = 103.3$  Hz), 113.83, 55.09, 50.30; HRMS (ESI)  $m/z$   $[\text{M}+\text{H}]^+$  Calcd. for  $\text{C}_{35}\text{H}_{31}\text{NO}_3\text{P}$  544.2036; Found 544.2043.

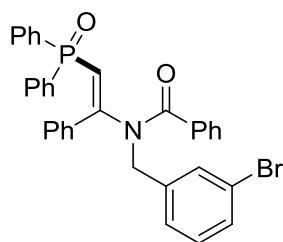

**(E)-N-(3-bromobenzyl)-N-(2-(diphenylphosphoryl)-1-phenylvinyl)benzamide (3ra)**

The title compound was synthesized following the general procedure and the residue was purified by flash chromatography on silica gel (PE : EA = 1 : 1). **3ra** was obtained as a white solid (206.9 mg, 70% yield). m.p. 188-189 °C; <sup>1</sup>H NMR (500 MHz, DMSO-*d*<sub>6</sub>) δ 7.62-7.57 (m, 2H), 7.51 (d, *J* = 7.9 Hz, 1H), 7.48-7.41 (m, 4H), 7.37-7.31 (m, 5H), 7.28 (d, *J* = 7.8 Hz, 1H), 7.23 (td, *J* = 7.8, 2.8 Hz, 4H), 7.17 (t, *J* = 7.4 Hz, 1H), 7.09-7.02 (m, 6H), 6.07 (d, *J* = 13.7 Hz, 1H), 4.81 (s, 2H); <sup>31</sup>P NMR (202 MHz, DMSO-*d*<sub>6</sub>) δ 15.70; <sup>13</sup>C NMR (126 MHz, DMSO-*d*<sub>6</sub>) δ 171.39, 156.54 (d, *J*<sub>C-P</sub> = 8.8 Hz), 139.61, 136.16, 134.29 (d, *J*<sub>C-P</sub> = 3.8 Hz), 134.10 (d, *J*<sub>C-P</sub> = 107.1 Hz), 131.07, 131.00 (d, *J*<sub>C-P</sub> = 1.3 Hz), 130.69, 130.44 (d, *J*<sub>C-P</sub> = 32.8 Hz), 130.01 (d, *J*<sub>C-P</sub> = 10.1 Hz), 129.51, 128.41, 128.10 (d, *J*<sub>C-P</sub> = 11.3 Hz), 128.01, 127.78, 127.25, 121.66, 118.48 (d, *J*<sub>C-P</sub> = 102.1 Hz), 50.25; HRMS (ESI) *m/z* [M+H]<sup>+</sup> Calcd. for C<sub>34</sub>H<sub>28</sub>BrNO<sub>2</sub>P 592.1036, 594.1015; Found 592.1042, 594.1020.

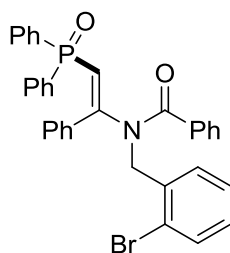

**(*E*)-*N*-(2-bromobenzyl)-*N*-(2-(diphenylphosphoryl)-1-phenylvinyl)benzamide  
(**3sa**)**

The title compound was synthesized following the general procedure and the residue was purified by flash chromatography on silica gel (PE : EA = 1 : 1). **3sa** was obtained as a white solid (198.0 mg, 67% yield). m.p. 145-147 °C; <sup>1</sup>H NMR (500 MHz, DMSO-*d*<sub>6</sub>) δ 7.73 (dd, *J* = 7.2, 2.1 Hz, 2H), 7.57-7.50 (m, 4H), 7.48 (d, *J* = 7.7 Hz, 1H), 7.39 (d, *J* = 7.4 Hz, 3H), 7.34 (t, *J* = 7.5 Hz, 2H), 7.27-7.16 (m, 6H), 7.10 (t, *J* = 7.6 Hz, 2H), 7.03 (dd, *J* = 11.9, 7.6 Hz, 4H), 6.16 (d, *J* = 13.6 Hz, 1H), 4.81 (s, 2H); <sup>31</sup>P NMR (202 MHz, DMSO-*d*<sub>6</sub>) δ 15.48; <sup>13</sup>C NMR (126 MHz, DMSO-*d*<sub>6</sub>) δ 171.17, 156.36 (d, *J*<sub>C-P</sub> = 7.6 Hz), 136.04, 135.23, 134.07 (d, *J*<sub>C-P</sub> = 107.1 Hz), 133.70 (d, *J*<sub>C-P</sub> = 3.8 Hz), 132.46, 131.00 (d, *J*<sub>C-P</sub> = 1.3 Hz), 130.38 (d, *J*<sub>C-P</sub> = 45.4 Hz), 130.00 (d, *J*<sub>C-P</sub> = 10.1 Hz), 129.45, 129.23 (d, *J*<sub>C-P</sub> = 35.3 Hz), 128.54, 128.13, 128.06 (d, *J*<sub>C-P</sub> = 11.3 Hz), 127.94, 127.91, 122.14, 119.71 (d, *J*<sub>C-P</sub> = 102.1 Hz),

50.73; HRMS (ESI)  $m/z$   $[M+H]^+$  Calcd. for  $C_{34}H_{28}BrNO_2P$  592.1036, 594.1015; Found 592.1029, 594.1009.

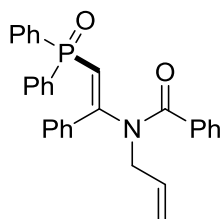

**(E)-N-allyl-N-(2-(diphenylphosphoryl)-1-phenylvinyl)benzamide (3ta)**

The title compound was synthesized following the general procedure and the residue was purified by flash chromatography on silica gel (PE : EA = 1 : 1). **3ta** was obtained as a white solid (173.7 mg, 75% yield), m.p. 136-137 °C;  $^1H$  NMR (500 MHz,  $DMSO-d_6$ )  $\delta$  7.59 (d,  $J = 7.2$  Hz, 2H), 7.53-7.44 (m, 5H), 7.34 (t,  $J = 7.4$  Hz, 2H), 7.27-7.21 (m, 4H), 7.20-7.08 (m, 7H), 6.10 (d,  $J = 13.4$  Hz, 1H), 5.95-5.85 (m, 1H), 5.17 (d,  $J = 10.3$  Hz, 1H), 5.06 (d,  $J = 17.2$  Hz, 1H), 4.14 (d,  $J = 5.9$  Hz, 2H);  $^{31}P$  NMR (202 MHz,  $DMSO-d_6$ )  $\delta$  15.48;  $^{13}C$  NMR (126 MHz,  $DMSO-d_6$ )  $\delta$  171.13, 157.60 (d,  $J_{C-P} = 8.8$  Hz), 136.88, 134.97 (d,  $J_{C-P} = 3.8$  Hz), 134.63 (d,  $J_{C-P} = 105.8$  Hz), 133.55, 131.48, 130.76 (d,  $J_{C-P} = 45.4$  Hz), 130.55, 130.47, 129.92, 128.97, 128.56 (d,  $J_{C-P} = 12.6$  Hz), 128.36, 128.32, 119.27 (d,  $J_{C-P} = 102.1$  Hz), 118.54, 50.92; HRMS (ESI)  $m/z$   $[M+Na]^+$  Calcd. for  $C_{30}H_{26}NO_2PNa$  486.1593; Found 486.1598.

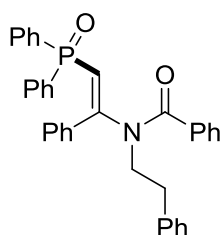

**(E)-N-(2-(diphenylphosphoryl)-1-phenylvinyl)-N-phenethylbenzamide (3ua)**

The title compound was synthesized following the general procedure and the residue was purified by flash chromatography on silica gel (PE : EA = 1 : 1). **3ua** was obtained as a white solid (210.9 mg, 80% yield). m.p. 167-169 °C;  $^1H$  NMR (500 MHz,  $DMSO-d_6$ )  $\delta$  7.60-7.56 (m, 2H), 7.53-7.45 (m, 5H), 7.36 (t,  $J = 7.4$  Hz, 2H), 7.26 (td,  $J = 7.7, 2.7$  Hz, 4H), 7.23-7.19 (m, 3H), 7.18-7.08 (m, 7H), 7.06-7.01 (m, 2H), 5.96 (d,  $J = 13.5$  Hz, 1H), 3.67 (t,  $J = 7.8$  Hz, 2H), 2.90 (t,  $J = 7.8$  Hz, 2H);  $^{31}P$

NMR (202 MHz, DMSO-*d*<sub>6</sub>)  $\delta$  15.38; <sup>13</sup>C NMR (126 MHz, DMSO-*d*<sub>6</sub>)  $\delta$  171.20, 157.68 (d, *J*<sub>C-P</sub> = 8.8 Hz), 138.99, 137.03, 134.88 (d, *J*<sub>C-P</sub> = 3.8 Hz), 134.60 (d, *J*<sub>C-P</sub> = 107.1 Hz), 131.50 (d, *J*<sub>C-P</sub> = 2.5 Hz), 130.77 (d, *J*<sub>C-P</sub> = 30.2 Hz), 130.54, 130.47, 129.92, 129.02, 128.99, 128.62, 128.53, 128.40, 128.31, 126.86, 119.44 (d, *J*<sub>C-P</sub> = 100.8 Hz), 50.37, 33.85; HRMS (ESI) *m/z* [M+H]<sup>+</sup> Calcd. for C<sub>35</sub>H<sub>31</sub>NO<sub>2</sub>P 528.2087; Found 528.2091.

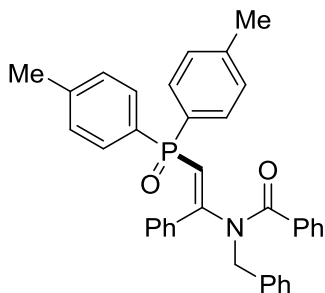

**(*E*)-*N*-benzyl-*N*-(2-(di-*p*-tolylphosphoryl)-1-phenylvinyl)benzamide (**3ab**)**

The title compound was synthesized following the general procedure and the residue was purified by flash chromatography on silica gel (PE : EA = 1 : 1). **3ab** was obtained as a light yellow solid (221.9 mg, 82% yield). m.p. 160-162 °C; <sup>1</sup>H NMR (500 MHz, DMSO-*d*<sub>6</sub>)  $\delta$  7.58 (d, *J* = 7.3 Hz, 2H), 7.44 (dt, *J* = 14.6, 7.1 Hz, 3H), 7.34 (ddd, *J* = 20.1, 13.3, 7.3 Hz, 5H), 7.23 (d, *J* = 7.1 Hz, 2H), 7.19 (t, *J* = 7.4 Hz, 1H), 7.10 (t, *J* = 7.6 Hz, 2H), 7.03 (dd, *J* = 8.0, 2.5 Hz, 4H), 6.89 (dd, *J* = 11.7, 7.8 Hz, 4H), 5.90 (d, *J* = 13.7 Hz, 1H), 4.79 (s, 2H), 2.22 (s, 6H); <sup>31</sup>P NMR (202 MHz, DMSO-*d*<sub>6</sub>)  $\delta$  15.96; <sup>13</sup>C NMR (126 MHz, DMSO-*d*<sub>6</sub>)  $\delta$  171.19, 156.17 (d, *J*<sub>C-P</sub> = 8.8 Hz), 140.83, 136.57 (d, *J*<sub>C-P</sub> = 61.7 Hz), 134.34 (d, *J*<sub>C-P</sub> = 5.0 Hz), 131.51, 130.64, 130.41, 130.04 (d, *J*<sub>C-P</sub> = 10.1 Hz), 129.96, 129.56, 128.63 (d, *J*<sub>C-P</sub> = 12.6 Hz), 128.45, 128.39, 128.21, 127.87, 127.74, 127.37, 119.41 (d, *J*<sub>C-P</sub> = 100.8 Hz), 50.80, 20.91; HRMS (ESI) *m/z* [M+H]<sup>+</sup> Calcd. for C<sub>36</sub>H<sub>33</sub>NO<sub>2</sub>P 542.2243; Found 542.2236.

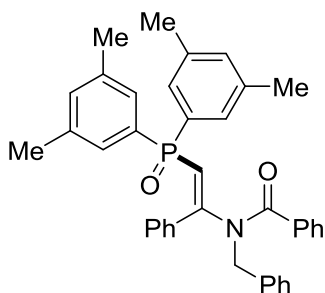

**(E)-N-benzyl-N-(2-(bis(3,5-dimethylphenyl)phosphoryl)-1-phenylvinyl)benzamide (3ac)**

The title compound was synthesized following the general procedure and the residue was purified by flash chromatography on silica gel (PE : EA = 1 : 1). **3ac** was obtained as a white solid (199.2 mg, 70% yield). m.p. 177-178 °C; <sup>1</sup>H NMR (500 MHz, DMSO-*d*<sub>6</sub>) δ 7.53 (d, *J* = 7.5 Hz, 2H), 7.39-7.34 (m, 3H), 7.33-7.27 (m, 7H), 7.15 (t, *J* = 7.3 Hz, 1H), 7.06 (t, *J* = 7.6 Hz, 2H), 6.95 (s, 2H), 6.73 (d, *J* = 12.0 Hz, 4H), 5.98 (d, *J* = 13.7 Hz, 1H), 4.84 (s, 2H), 2.15 (s, 12H); <sup>31</sup>P NMR (202 MHz, DMSO-*d*<sub>6</sub>) δ 16.16; <sup>13</sup>C NMR (126 MHz, DMSO-*d*<sub>6</sub>) δ 171.23, 156.08 (d, *J*<sub>C-P</sub> = 7.6 Hz), 137.18 (d, *J*<sub>C-P</sub> = 13.9 Hz), 136.90, 136.22, 134.77 (d, *J*<sub>C-P</sub> = 3.8 Hz), 133.86 (d, *J*<sub>C-P</sub> = 104.6 Hz), 132.40 (d, *J*<sub>C-P</sub> = 1.3 Hz), 130.00 (d, *J*<sub>C-P</sub> = 78.1 Hz), 129.45, 128.43, 128.25, 128.16, 127.77, 127.69, 127.62, 127.51, 127.42, 118.11 (d, *J*<sub>C-P</sub> = 102.1 Hz), 50.92, 20.75; HRMS (ESI) *m/z* [M+H]<sup>+</sup> Calcd. for C<sub>38</sub>H<sub>37</sub>NO<sub>2</sub>P 570.2556; Found 570.2551.

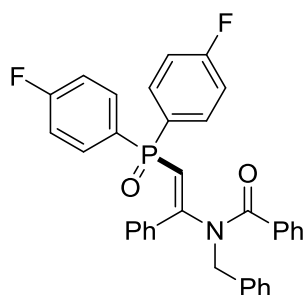

**(E)-N-benzyl-N-(2-(bis(4-fluorophenyl)phosphoryl)-1-phenylvinyl)benzamide (3ad)**

The title compound was synthesized following the general procedure and the residue was purified by flash chromatography on silica gel (PE : EA = 1 : 1). **3ad** was obtained as a light yellow oil (197.7 mg, 72% yield). <sup>1</sup>H NMR (500 MHz, DMSO-*d*<sub>6</sub>) δ 7.61-7.55 (m, 2H), 7.50-7.43 (m, 3H), 7.36 (dd, *J* = 8.0, 6.3 Hz, 2H), 7.33-7.28 (m, 3H), 7.28-7.23 (m, 2H), 7.21-7.17 (m, 1H), 7.12-7.00 (m, 10H), 6.02 (d, *J* = 14.1 Hz, 1H), 4.83 (s, 2H); <sup>31</sup>P NMR (202 MHz, DMSO-*d*<sub>6</sub>) δ 14.69; <sup>19</sup>F NMR (471 MHz, DMSO-*d*<sub>6</sub>) δ -108.56; <sup>13</sup>C NMR (126 MHz, DMSO-*d*<sub>6</sub>) δ 171.38, 163.66 (d, *J*<sub>C-F</sub> = 252.0 Hz), 157.10 (d, *J*<sub>C-P</sub> = 8.8 Hz), 136.79, 136.41, 134.39 (d, *J*<sub>C-P</sub>



= 5.0 Hz), 132.86 (d,  $J_{C-P}$  = 10.1 Hz), 132.78 (d,  $J_{C-F}$  = 8.8 Hz), 130.52, 130.14, 129.66 (d,  $J_{C-P}$  = 2.5 Hz), 129.53, 128.48, 128.19, 127.86 (d,  $J_{C-P}$  = 15.1 Hz), 127.41, 117.80 (d,  $J_{C-P}$  = 104.6 Hz), 115.39 (d,  $J_{C-F}$  = 21.4 Hz), 115.29 (d,  $J_{C-P}$  = 21.4 Hz), 50.87; HRMS (ESI)  $m/z$   $[M+H]^+$  Calcd. for  $C_{34}H_{27}F_2NO_2P$  550.1742; Found 550.1737.

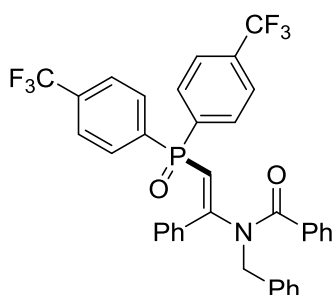

**(E)-N-benzyl-N-(2-(bis(4-(trifluoromethyl)phenyl)phosphoryl)-1-phenylvinyl)benzamide (3ae)**

The title compound was synthesized following the general procedure and the residue was purified by flash chromatography on silica gel (PE : EA = 1 : 1). **3ae** was obtained as a white solid (230.5 mg, 71% yield). m.p. 144-146 °C;  $^1H$  NMR (500 MHz, DMSO- $d_6$ )  $\delta$  7.60 (d,  $J$  = 7.5 Hz, 6H), 7.48-7.43 (m, 3H), 7.39 (t,  $J$  = 7.4 Hz, 2H), 7.33 (d,  $J$  = 7.1 Hz, 1H), 7.31-7.22 (m, 8H), 7.14 (t,  $J$  = 7.4 Hz, 1H), 7.03 (t,  $J$  = 7.6 Hz, 2H), 6.17 (d,  $J$  = 14.6 Hz, 1H), 4.88 (s, 2H);  $^{31}P$  NMR (202 MHz, Chloroform- $d$ )  $\delta$  19.21;  $^{19}F$  NMR (471 MHz, Chloroform- $d$ )  $\delta$  -57.00;  $^{13}C$  NMR (126 MHz, DMSO- $d_6$ )  $\delta$  171.57, 158.24 (d,  $J_{C-P}$  = 8.8 Hz), 138.16 (d,  $J_{C-P}$  = 103.3 Hz), 136.56 (d,  $J_{C-P}$  = 49.1 Hz), 134.47 (d,  $J_{C-P}$  = 3.8 Hz), 131.35 (d,  $J_{C-P}$  = 2.5 Hz), 131.08, 131.00, 130.42 (d,  $J_{C-P}$  = 47.9 Hz), 129.51, 128.51, 128.48, 128.21, 128.01, 127.84, 127.44, 125.01 (q,  $J_{C-F}$  = 2.5 Hz), 124.9 (q,  $J_{C-F}$  = 3.8 Hz), 123.61 (q,  $J_{C-F}$  = 273.4 Hz), 115.57 (d,  $J_{C-P}$  = 107.1 Hz), 50.96; HRMS (ESI)  $m/z$   $[M+H]^+$  Calcd. for  $C_{36}H_{27}F_6NO_2P$  650.1678; Found 650.1683.

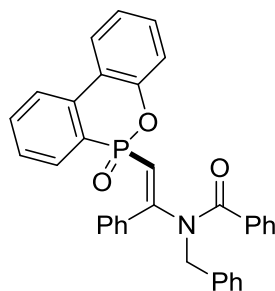

**(*E*)-*N*-benzyl-*N*-(2-(6-oxidodibenzo[*c,e*][1,2]oxaphosphinin-6-yl)-1-phenylvinyl)benzamide (3af)**

The title compound was synthesized following the general procedure and the residue was purified by flash chromatography on silica gel (PE : EA = 1 : 1). **3af** was obtained as a colorless oil (58.0 mg, 22% yield).  $^1\text{H}$  NMR (500 MHz, DMSO- $d_6$ )  $\delta$  8.03 (dd,  $J = 8.0, 1.7$  Hz, 1H), 8.00-7.95 (m, 1H), 7.60 (t,  $J = 7.7$  Hz, 1H), 7.33 (t,  $J = 7.5$  Hz, 1H), 7.30-7.21 (m, 9H), 7.15-7.08 (m, 6H), 7.05 (dd,  $J = 8.0, 1.4$  Hz, 2H), 6.95 (ddd,  $J = 13.4, 7.6, 1.4$  Hz, 1H), 6.65 (dd,  $J = 8.1, 1.3$  Hz, 1H), 5.80 (d,  $J = 13.5$  Hz, 1H), 4.85 (d,  $J = 15.2$  Hz, 1H), 4.70 (d,  $J = 15.1$  Hz, 1H);  $^{31}\text{P}$  NMR (202 MHz, DMSO- $d_6$ )  $\delta$  20.76;  $^{13}\text{C}$  NMR (126 MHz, DMSO- $d_6$ )  $\delta$  171.39, 157.44 (d,  $J_{\text{C-P}} = 11.3$  Hz), 147.94 (d,  $J_{\text{C-P}} = 7.6$  Hz), 136.85, 136.24, 135.41 (d,  $J_{\text{C-P}} = 3.8$  Hz), 134.38 (d,  $J_{\text{C-P}} = 6.3$  Hz), 132.91, 130.48, 130.25, 129.98, 129.54 (d,  $J_{\text{C-P}} = 11.3$  Hz), 129.30, 128.51, 128.16, 128.03, 127.99, 127.75, 127.43, 127.23, 125.62, 125.20 (d,  $J_{\text{C-P}} = 131.0$  Hz), 124.64, 123.88 (d,  $J_{\text{C-P}} = 10.1$  Hz), 121.91 (d,  $J_{\text{C-P}} = 11.3$  Hz), 119.74 (d,  $J_{\text{C-P}} = 6.3$  Hz), 112.61 (d,  $J_{\text{C-P}} = 141.1$  Hz), 52.19; HRMS (ESI)  $m/z$   $[\text{M}+\text{H}]^+$  Calcd. for  $\text{C}_{34}\text{H}_{27}\text{NO}_3\text{P}$  528.1723; Found 528.1717.

### 3. Applications of the $\beta$ -Phosphorylation Reaction

#### 3.1. Gram-Scale Synthesis of Compound 3aa

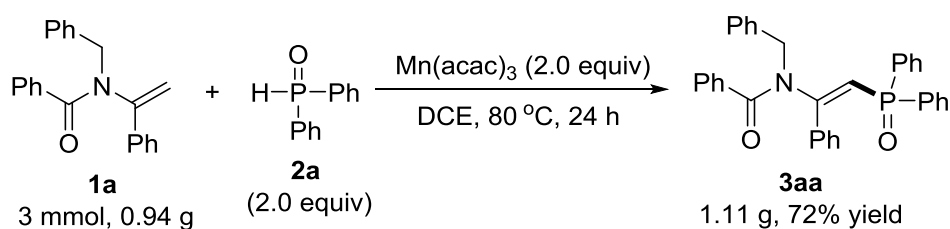

To a Schlenk tube (50 mL) equipped with a magnetic stirrer were added enamide **1a** (3.0 mmol), **2** (6.0 mmol),  $\text{Mn}(\text{acac})_3$  (6.0 equiv) and dry DCE (30 mL). The

reaction mixture was stirred at 80 °C for 24 h and then NaHCO<sub>3</sub> aqueous (10%) solution (100 mL) was added to quench the reaction. The mixture was extracted with ethyl acetate (3 × 80 mL), and combined organic layer was washed with brine (100 mL) and dried over anhydrous Na<sub>2</sub>SO<sub>4</sub>. The solvents were removed in *vacuo* and the residue was purified by flash column chromatography (PE : EA = 1 : 1) to afford products **3aa** in 72% yield.

### 3.2. Chemical Transformation of Compound **3aa**

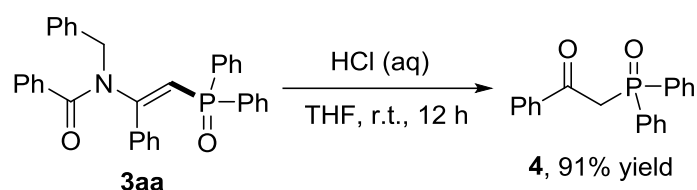

According to the reported literature procedures,<sup>[2]</sup> product **3aa** (0.3 mmol) was added into a reaction tube with a magnetic stirrer. THF (1 mL) and concentrated hydrochloric acid (1 mL) were then added sequentially by syringe. The resulting mixture was stirred at room temperature for about 12 h. Upon completion of the reaction as monitored by TLC, the solvent was then removed under vacuum. The residue was purified directly by silica gel chromatography, eluting with ethyl acetate/petroleum ether (1:3 v/v) to give compound **4**.

### 2-(Diphenylphosphoryl)-1-phenylethan-1-one (**4**)

Product **4** is a known compound and obtained as a white solid (87.4 mg, 91% yield). <sup>1</sup>H NMR (500 MHz, Chloroform-*d*) δ 7.99 (d, *J* = 7.7 Hz, 2H), 7.81 (dd, *J* = 12.0, 7.5 Hz, 4H), 7.56-7.49 (m, 3H), 7.49-7.39 (m, 6H), 4.15 (d, *J* = 15.2 Hz, 2H). This is consistent with previous literatures.<sup>[3]</sup>

## 4. Control Experiments

### 4.1. Reaction with Radical Trapping Agents TEMPO or BHT

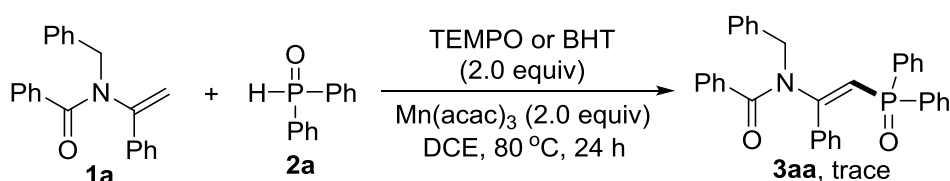

To a Schlenk tube (10 mL) equipped with a magnetic stirrer were added **1a** (0.5 mmol), **2a** (1.0 mmol), Mn(acac)<sub>3</sub> (1.0 mmol), TEMPO or BHT (1.0 mmol) and dry DCE (5 mL). The reaction mixture was stirred at 80 °C for 24 h and then NaHCO<sub>3</sub> aqueous (10%) solution (20 mL) was added to quench the reaction. The mixture was extracted with ethyl acetate (3 × 20 mL), and combined organic layer was washed with brine (50 mL) and dried over anhydrous Na<sub>2</sub>SO<sub>4</sub>. TLC indicated that product **3aa** was not observed in the reaction system.

#### 4.2. Reaction with 1,1-Diphenylethylene

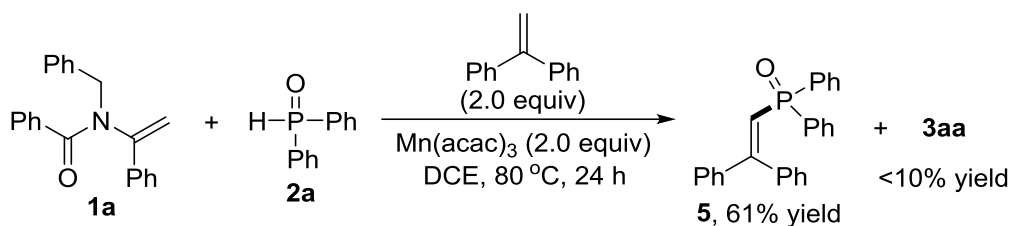

To a Schlenk tube (10 mL) equipped with a magnetic stirrer were added **1a** (0.5 mmol), **2a** (1.0 mmol), Mn(acac)<sub>3</sub> (1.0 mmol), 1,1-Diphenylethylene (1.0 mmol) and dry DCE (5 mL). The reaction mixture was stirred at 80 °C for 24 h and then NaHCO<sub>3</sub> aqueous (10%) solution (20 mL) was added to quench the reaction. The mixture was extracted with ethyl acetate (3 × 20 mL), and combined organic layer was washed with brine (50 mL) and dried over anhydrous Na<sub>2</sub>SO<sub>4</sub>. The solvents were removed in *vacuo* and the residue was purified by flash column chromatography (PE : EA = 1 : 1) to afford product **5** in 61% yield and trace amount of target product **3aa**.

(2,2-Diphenylvinyl)diphenylphosphine oxide (**5**)

Product **5** is a known compound and obtained as a white solid (116.0 mg, 61% yield). <sup>1</sup>H NMR (500 MHz, Chloroform-*d*) δ 7.74-7.62 (m, 4H), 7.41-7.28 (m, 11H), 7.25-7.19 (m, 2H), 7.16-7.04 (m, 3H), 6.80 (d, *J* = 18.4 Hz, 1H). This is consistent with previous literatures.<sup>[4]</sup>

## 5. References

[1] (a) S. S. Kinderman, J. H. V. Maarseveen, H. E. Schoemaker, H. Hiemstra, F. P. J. T. Rutjes, *Org. Lett.* **2001**, 3, 2045. (b) C.-H. Lei, D.-X. Wang, L. Zhao, J. Zhu, M.-X.

Wang, *J. Am. Chem. Soc.* **2013**, *135*, 4708.

[2] K. Zhao, Z.-Y. Zhang, X.-L. Cui, Y.-X. Wang, X.-D. Wu, W.-M. Li, J.-X. Wu, L.-L. Zhao, J.-Y. Guo, T.-P. Loh, *Org. Lett.* **2020**, *22*, 9029.

[3] (a) D. J. Fox, D. S. Pedersen, S. Warren, *Chem. Commun.* **2004**, 2598. (b) E. G. Leach, J. R. Shady, A. C. Boyden, A. Emig, A. T. Henry, E. K. Connor, R. J. Staples, S. Schaertel, E. J. Werner, S. M. Biros, *Dalton Trans.* **2017**, *46*, 15458.

[4] D.-L. Zhang, C.-K. Li, R.-S. Zeng, A. Shoberu, J.-P. Zou, *Org. Chem. Front.* **2019**, *6*, 236.

## 6. Crystallographic Data

High quality single crystals of **3aa** were cultivated from the evaporation of a solution of **3aa** in the mixture of EtOAc and *n*-hexane. As depicted below, the molecular structures were determined by X-ray diffraction analysis.

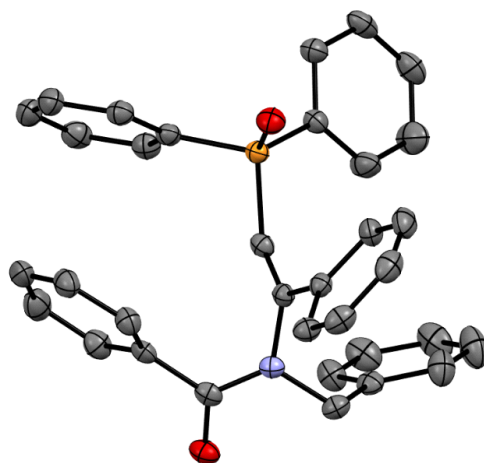

**Figure S1.** X-ray molecular structure of **3aa**. The molecular structure is depicted in an ellipsoid style at 50% probability level.

### Crystallographic data and structure refinement of **3aa**

|                   |                                                   |
|-------------------|---------------------------------------------------|
| CCDC Number       | 2141502                                           |
| Empirical formula | C <sub>34</sub> H <sub>28</sub> NO <sub>2</sub> P |
| Formula weight    | 513.1858                                          |
| Temperature       | 170.00 K                                          |
| Wavelength        | 1.54184 Å                                         |
| Crystal system    | Triclinic                                         |
| Space group       | P - 1                                             |
| a                 | 9.2756 (1) Å                                      |
| b                 | 10.2061 (1) Å                                     |

|                                   |                            |
|-----------------------------------|----------------------------|
| c                                 | 17.1546 (2) Å              |
| α                                 | 79.024 (1) °               |
| β                                 | 75.112 (1) °               |
| γ                                 | 74.328 (1) °               |
| Volumn                            | 1498.29 (3) Å <sup>3</sup> |
| Z                                 | 2                          |
| Density (calculated)              | 1.234                      |
| F(000)                            | 590.0                      |
| Radiation type                    | Cu Kα                      |
| Goodness-of-fit on F <sup>2</sup> | 1.052                      |
| Completeness to theta = 66.97 °   | 99.42%                     |
| R (reflections)                   | 0.0545 ( 5736 )            |
| wR2 (reflections)                 | 0.1537 ( 5906 )            |

## 7. Copies of <sup>1</sup>H NMR, <sup>13</sup>C NMR, <sup>19</sup>F NMR and <sup>31</sup>P NMR Spectra of Products

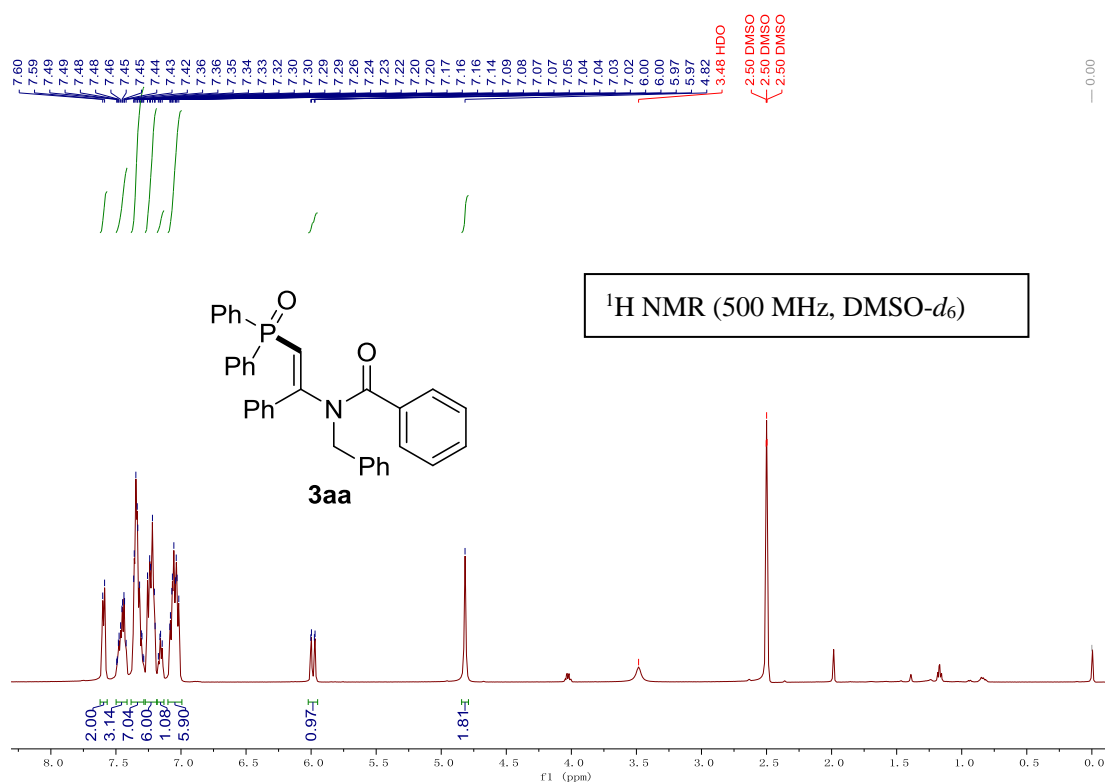

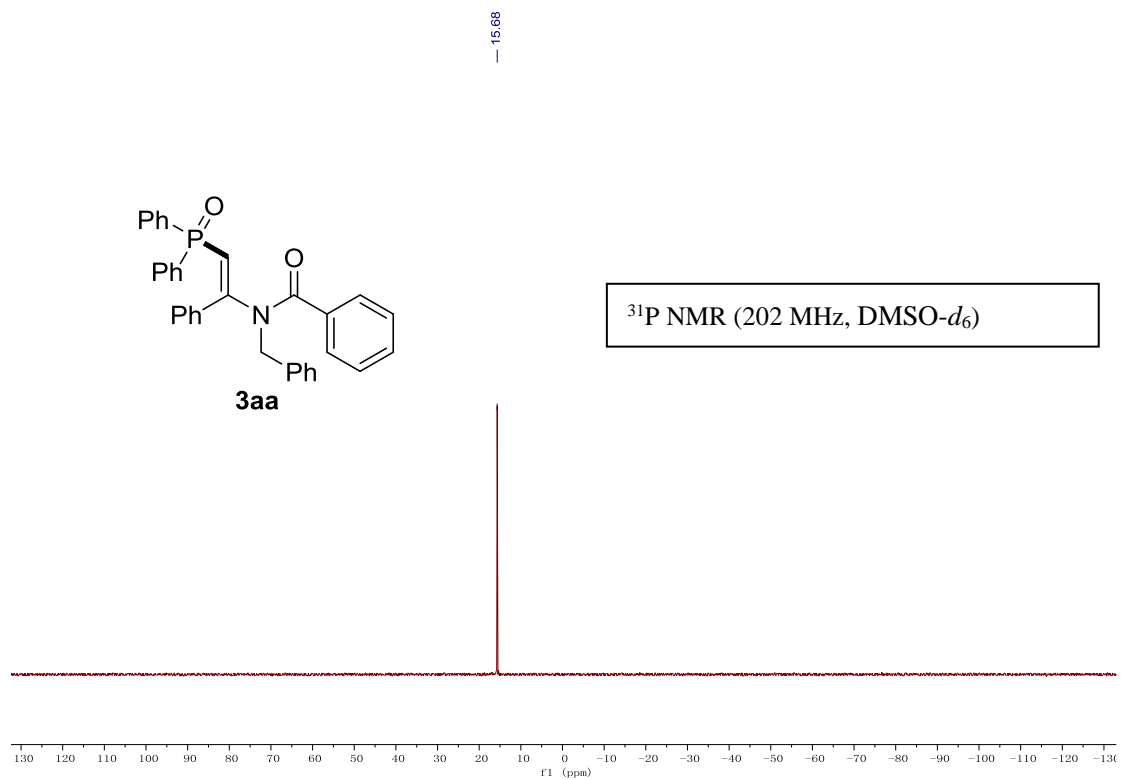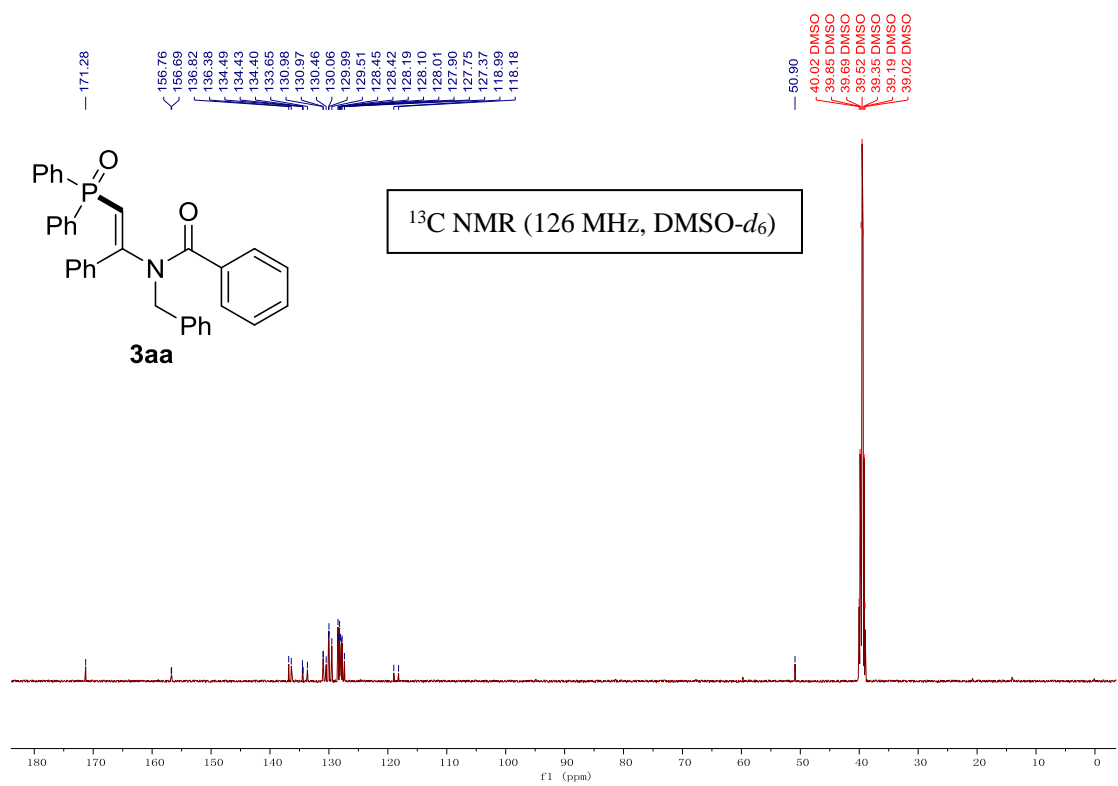

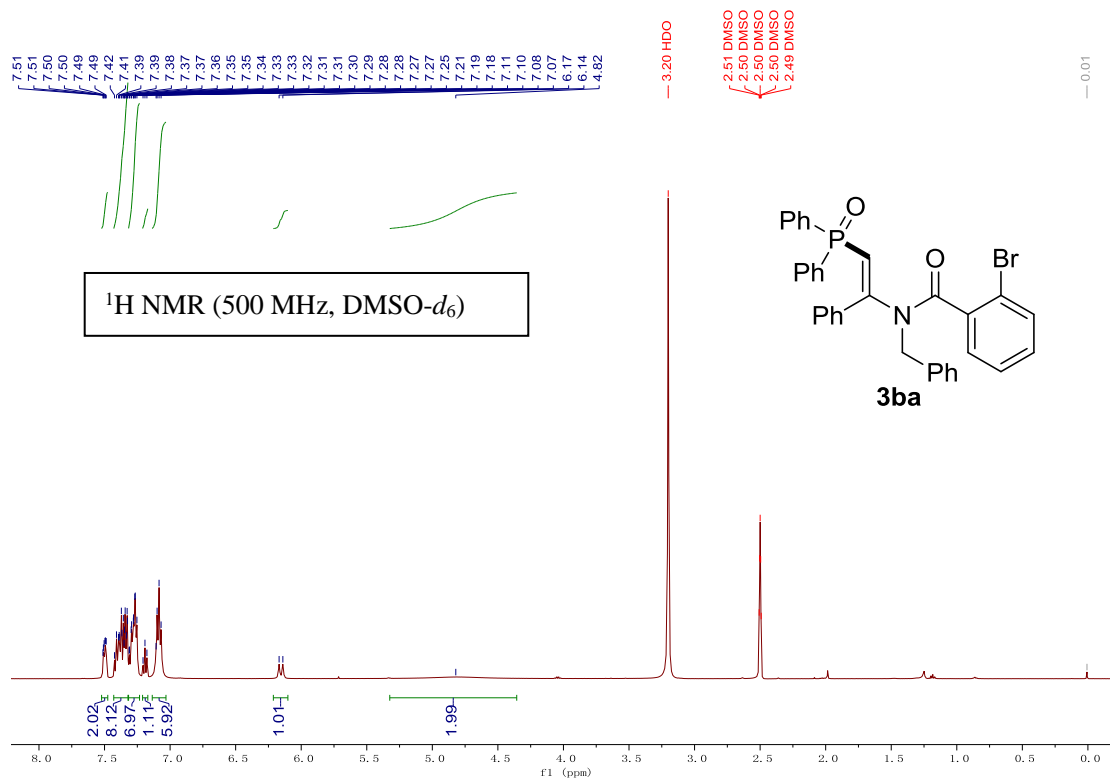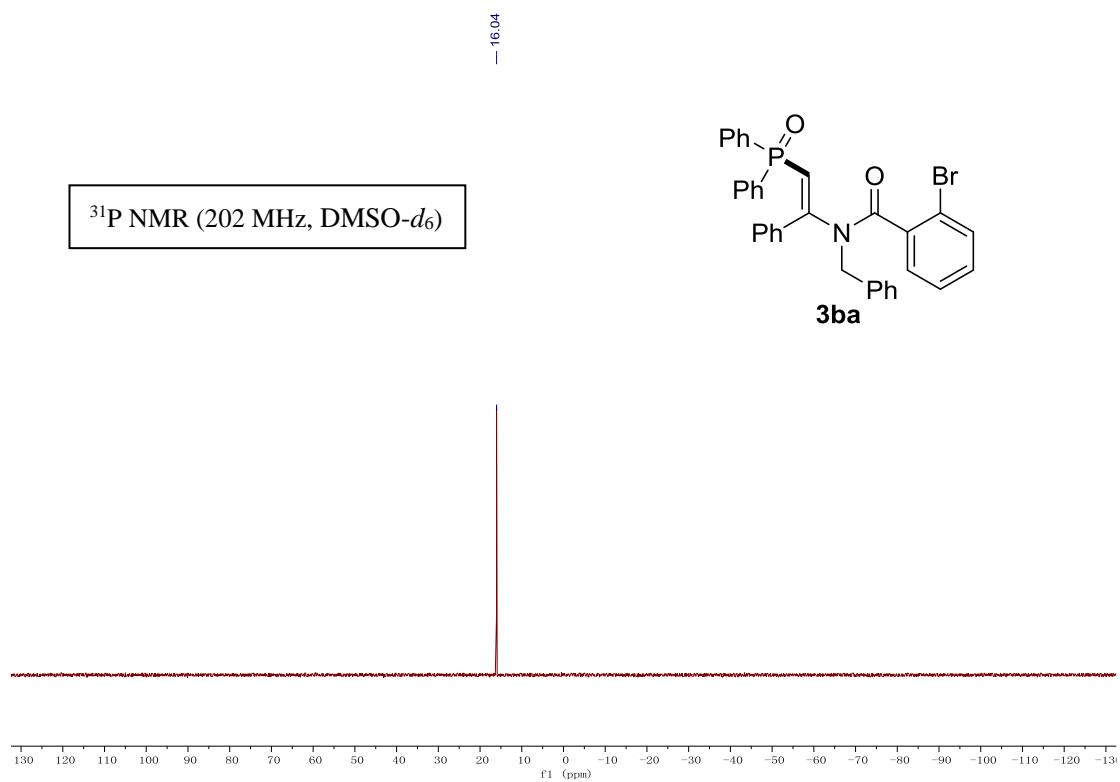



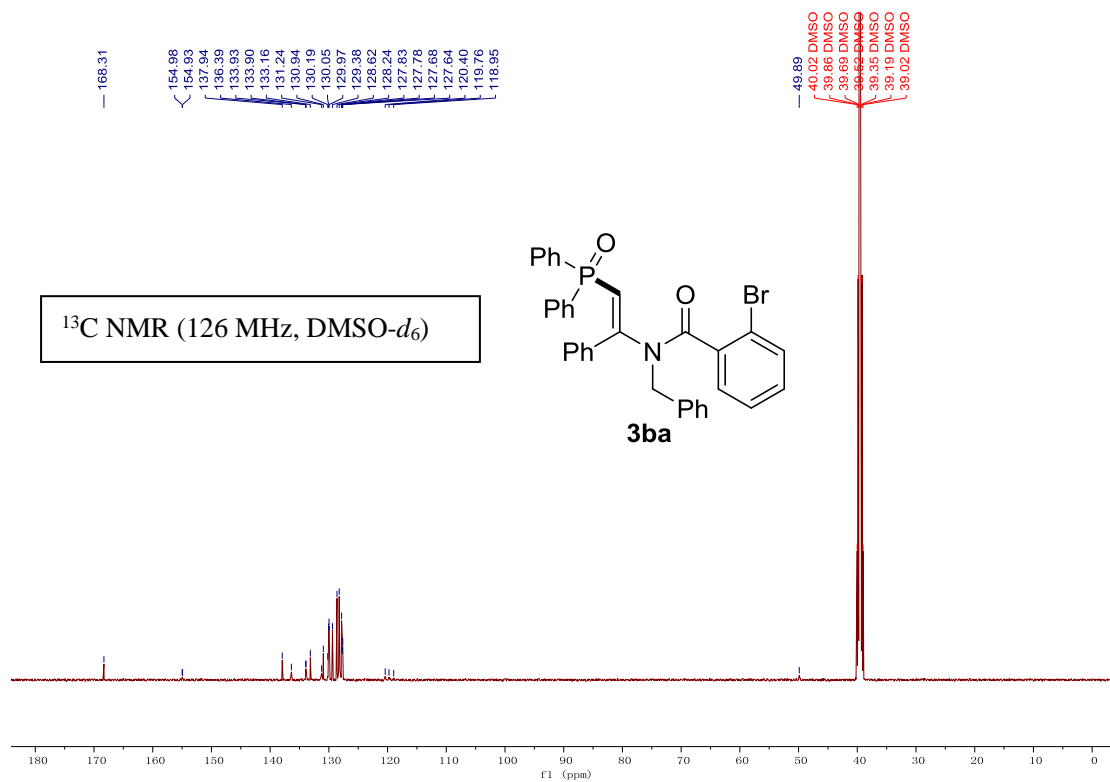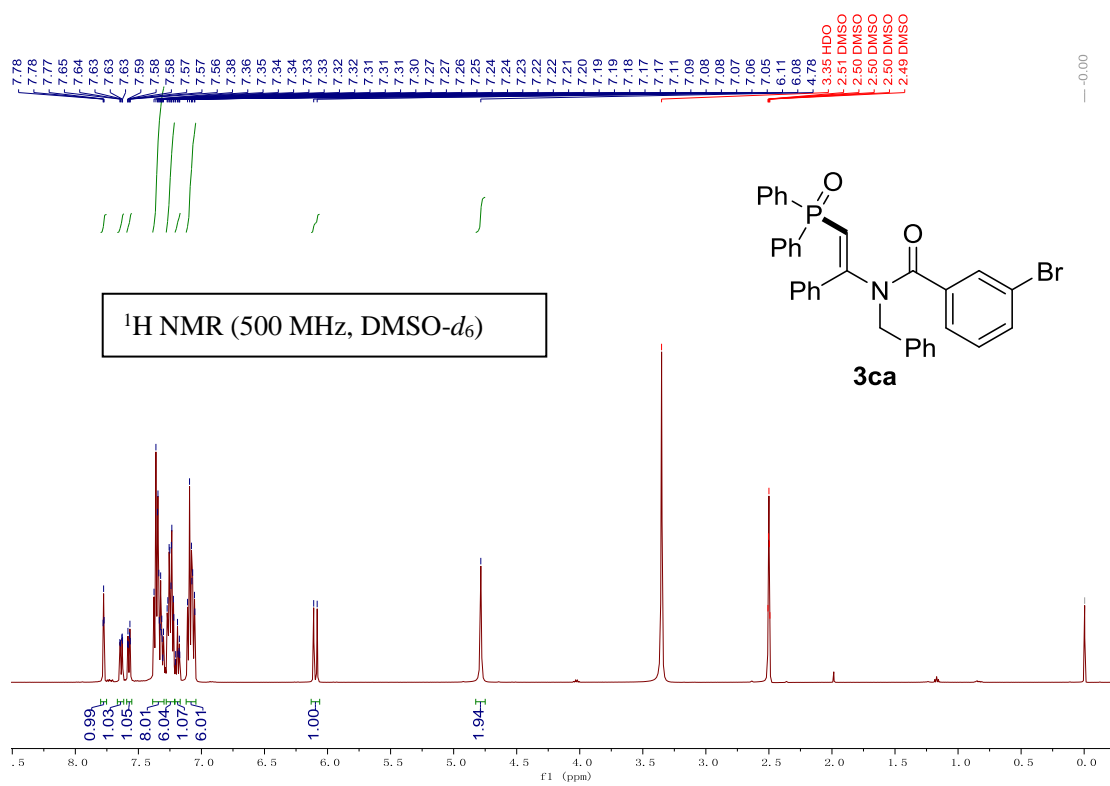

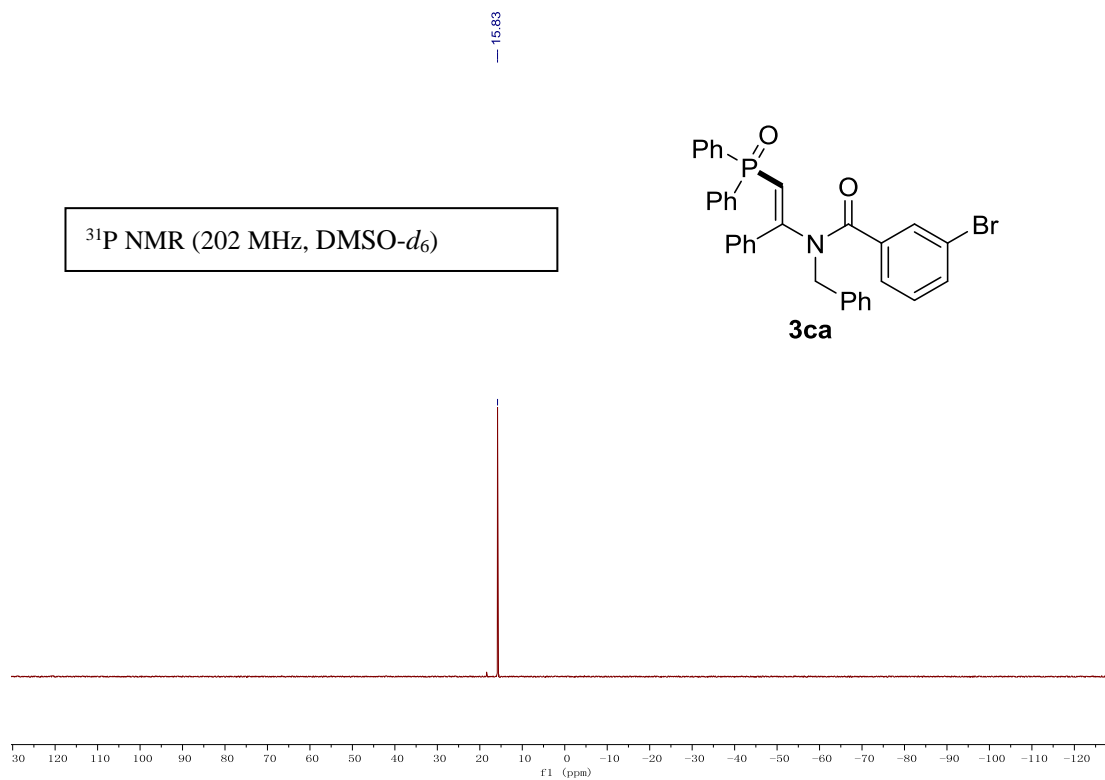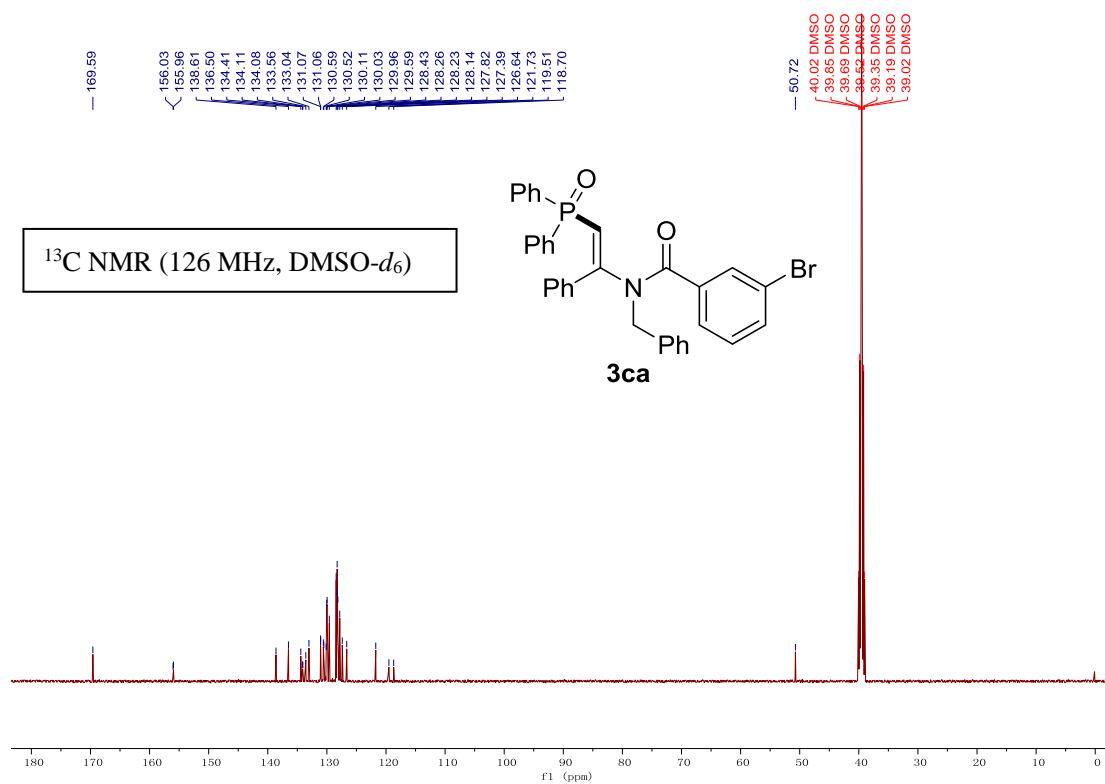

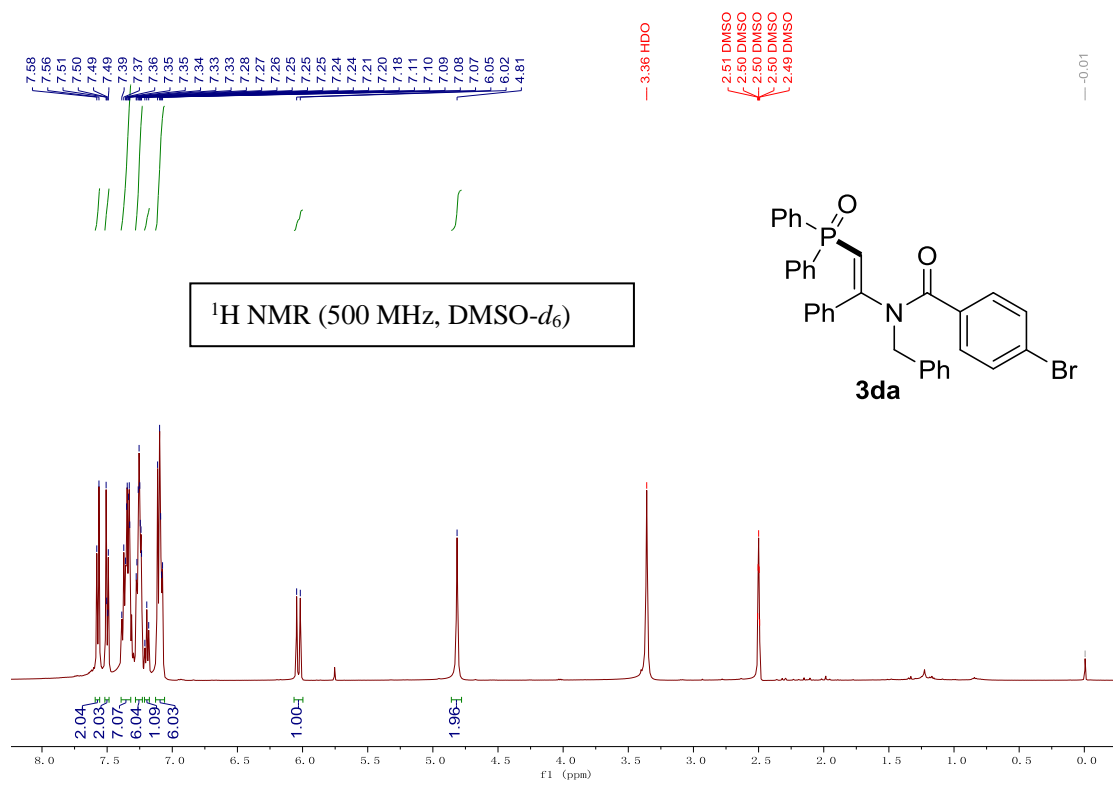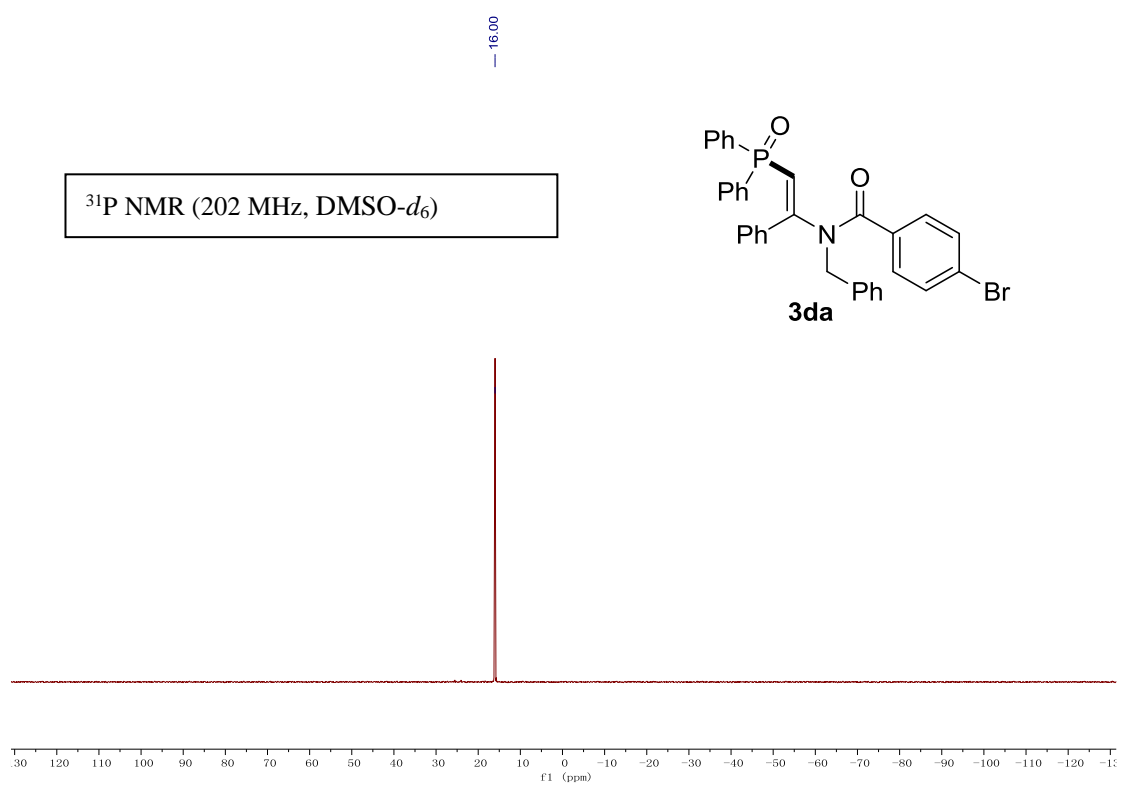

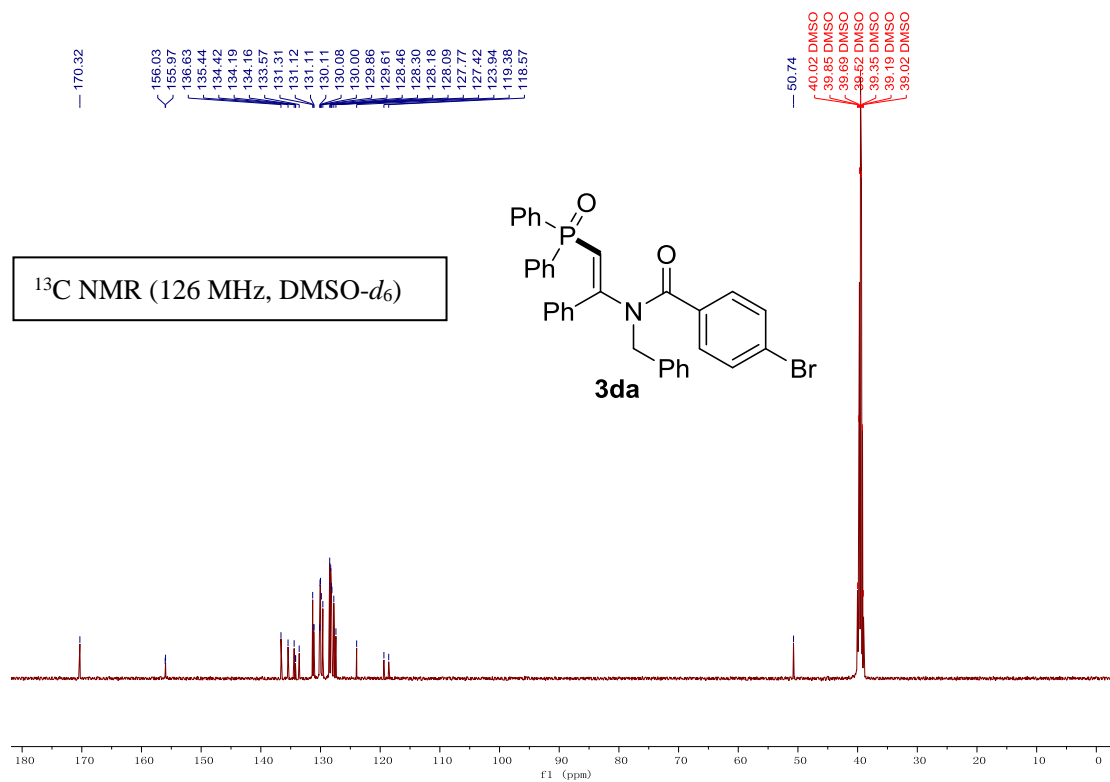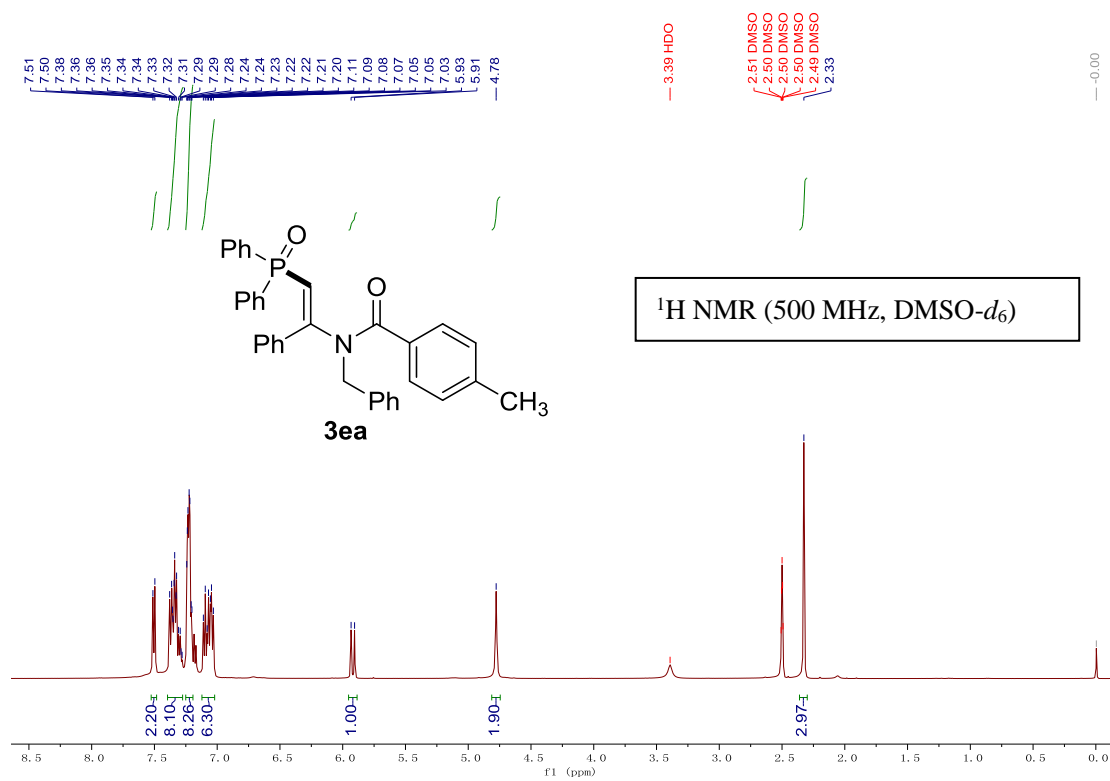

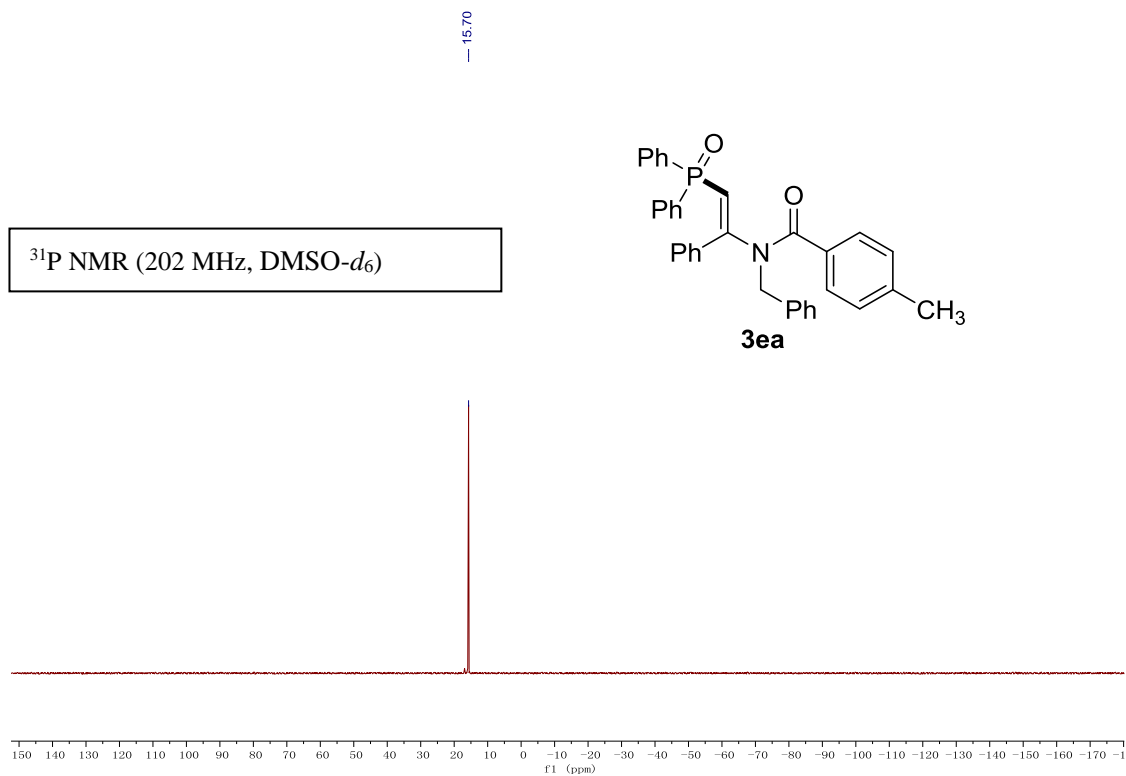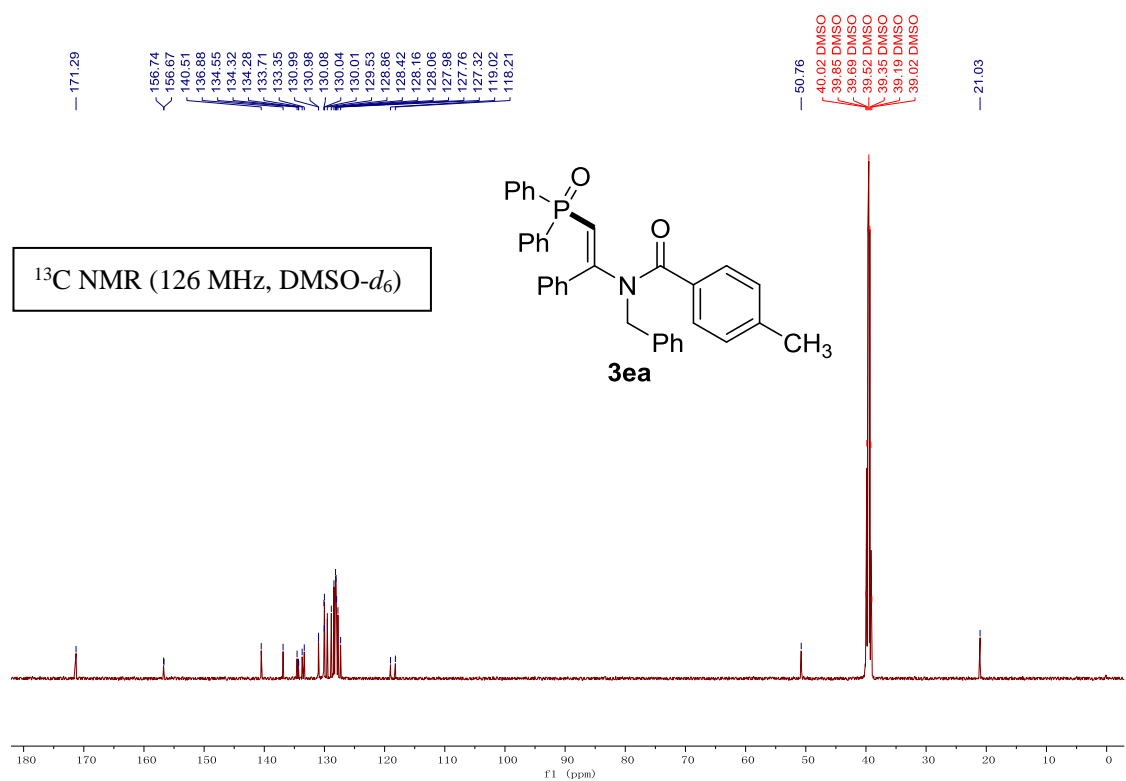

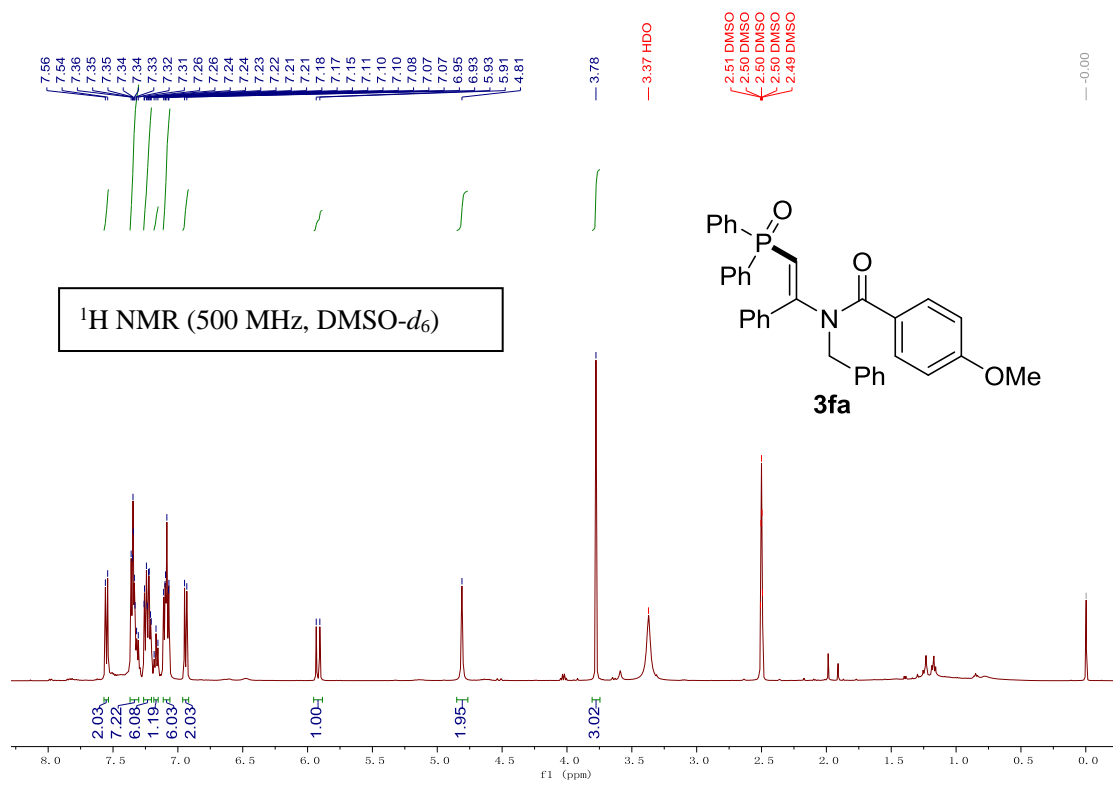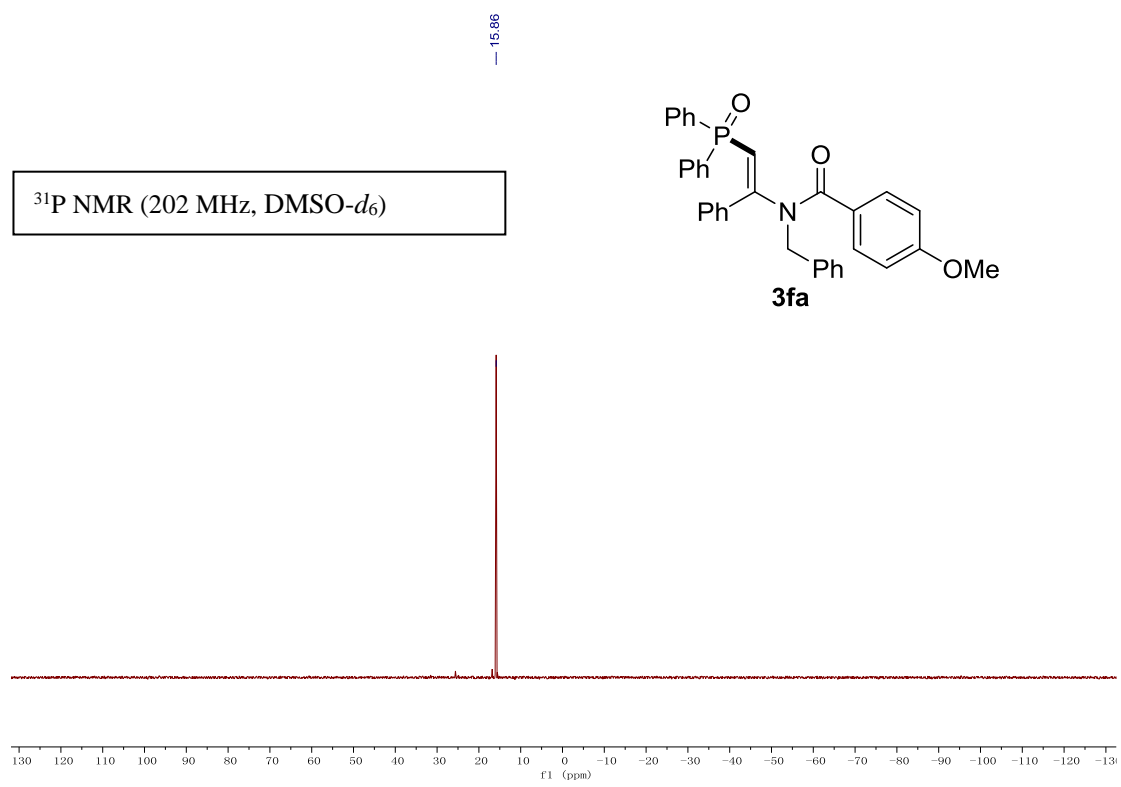

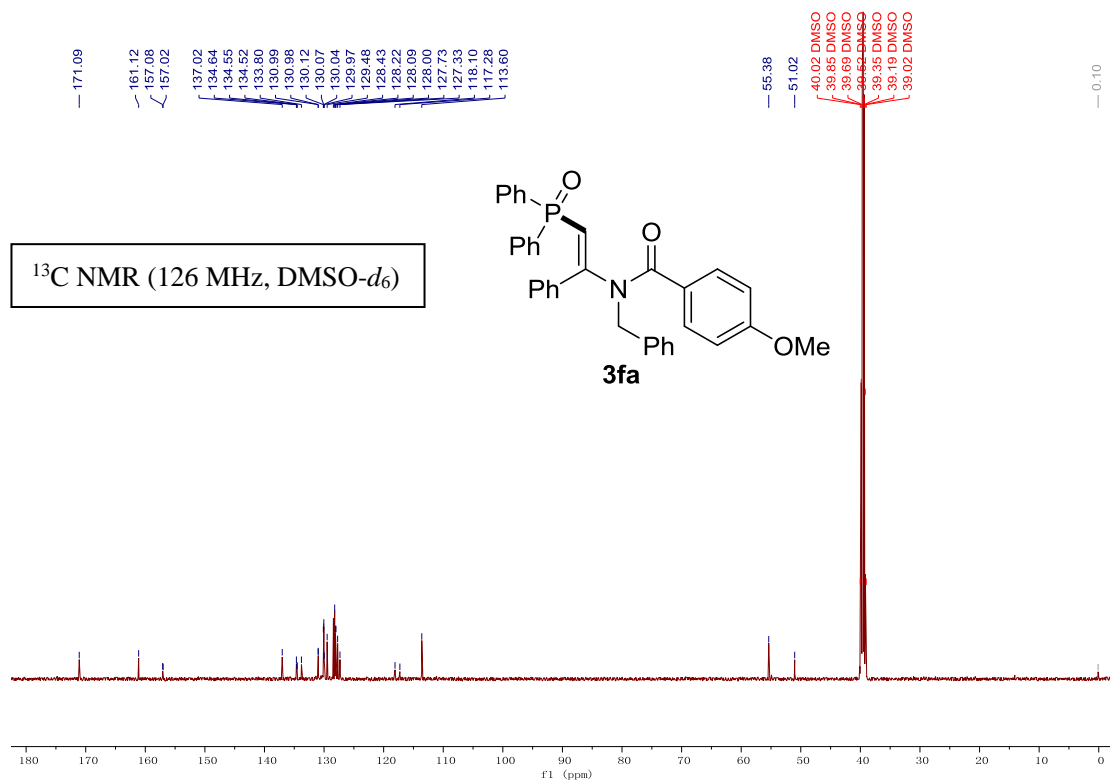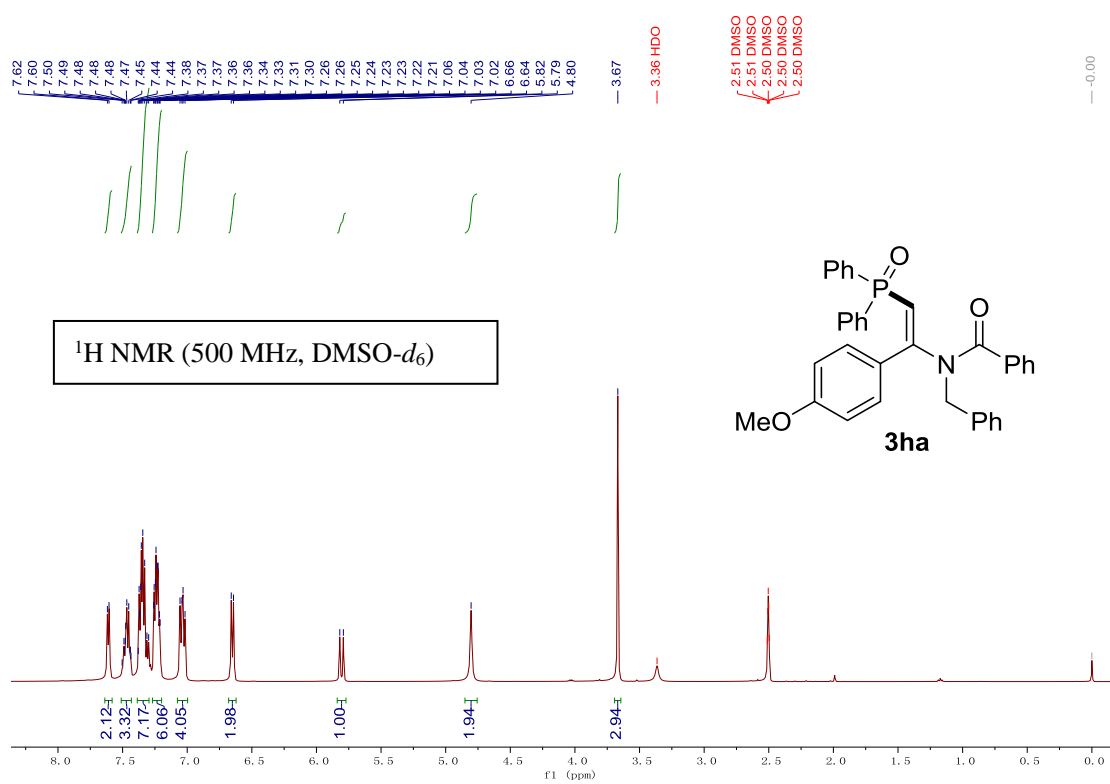

<sup>31</sup>P NMR (202 MHz, Chloroform-*d*)

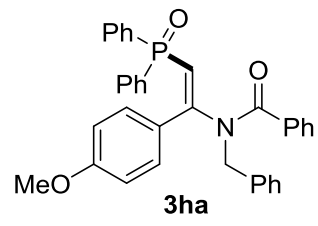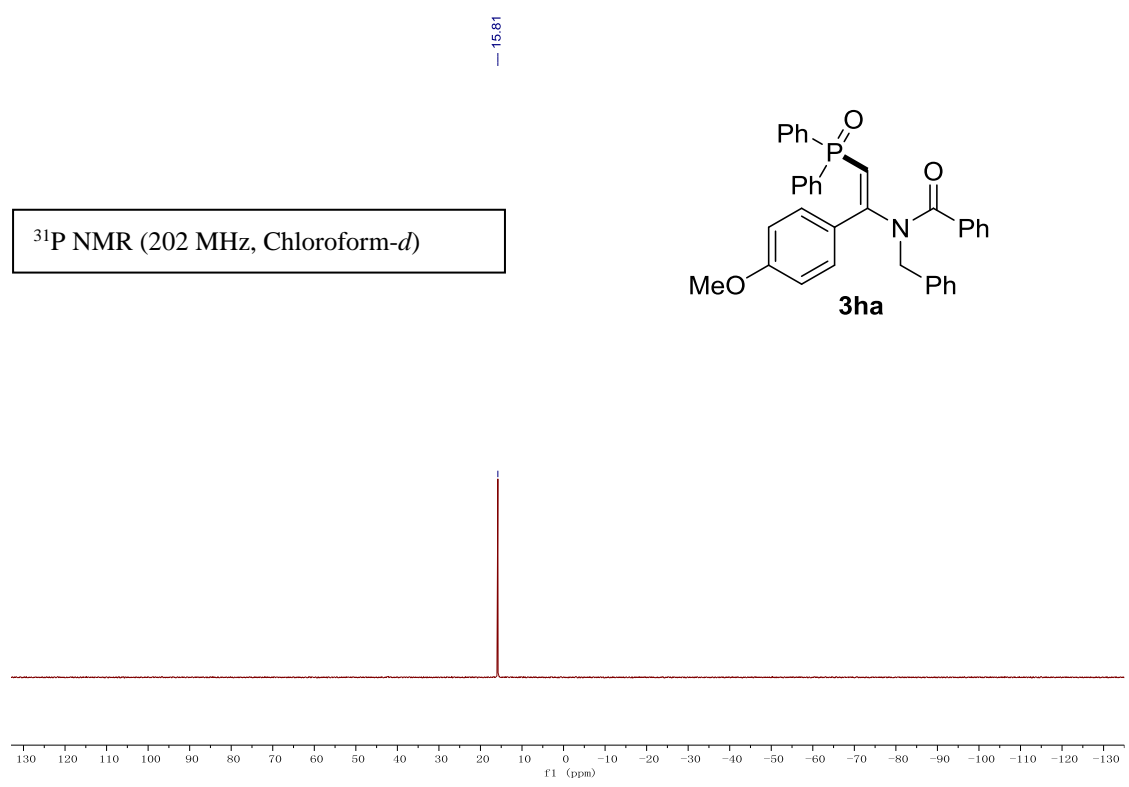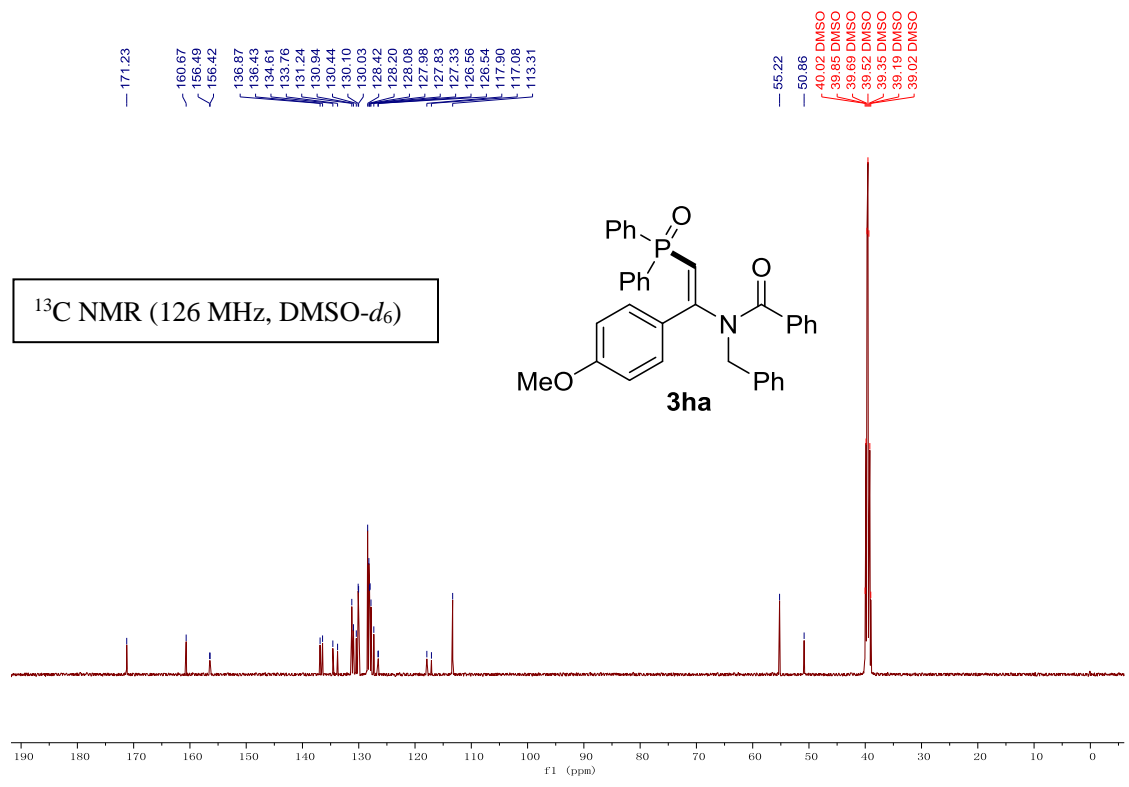

<sup>13</sup>C NMR (126 MHz, DMSO-*d*<sub>6</sub>)

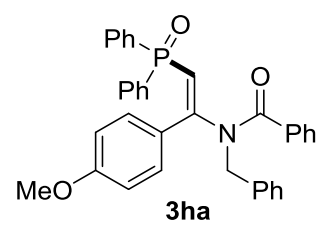



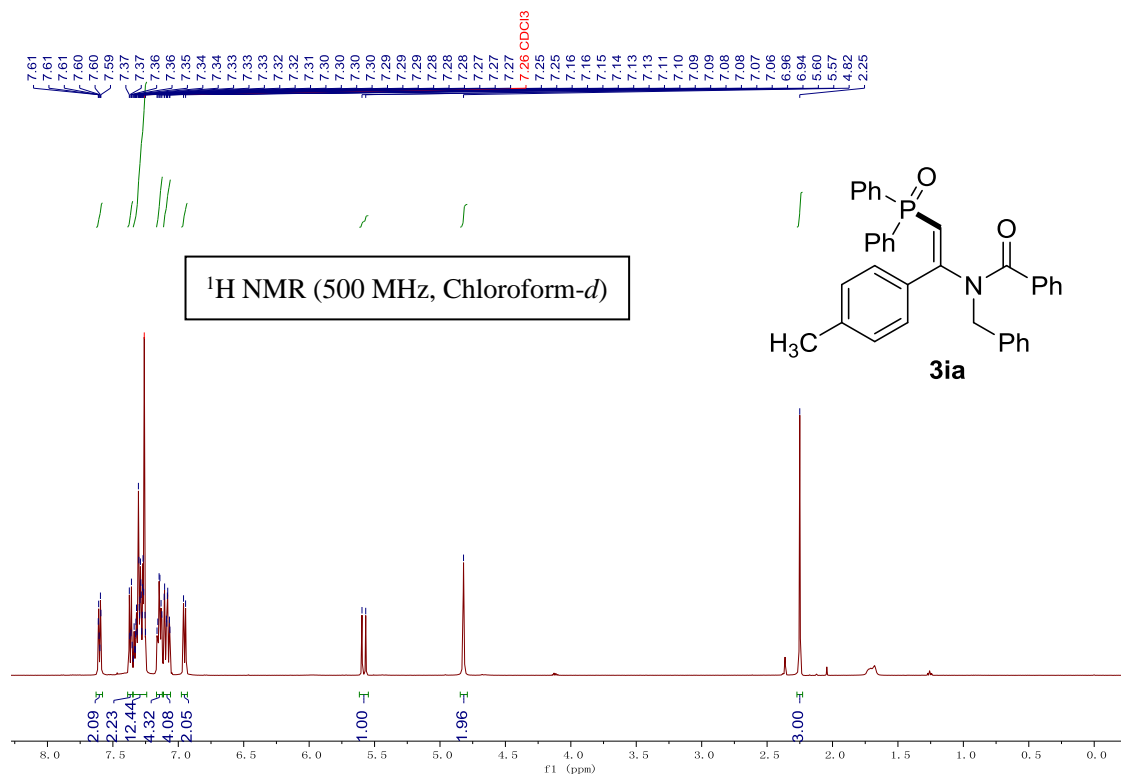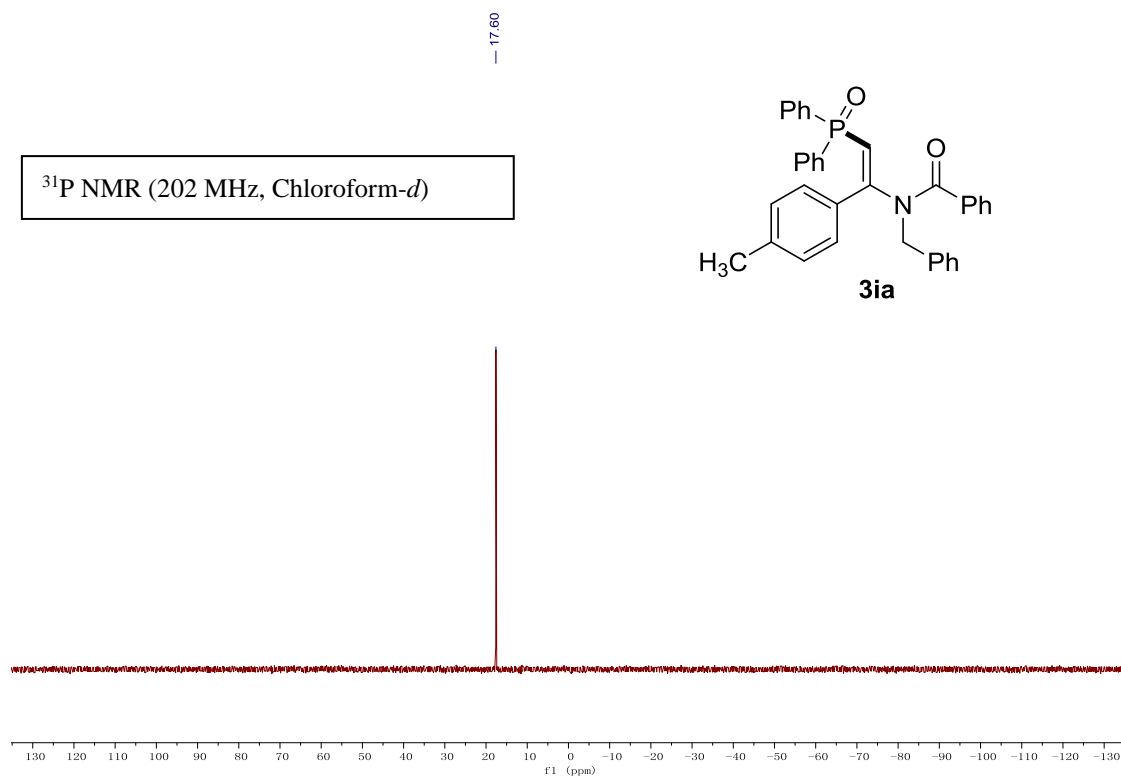

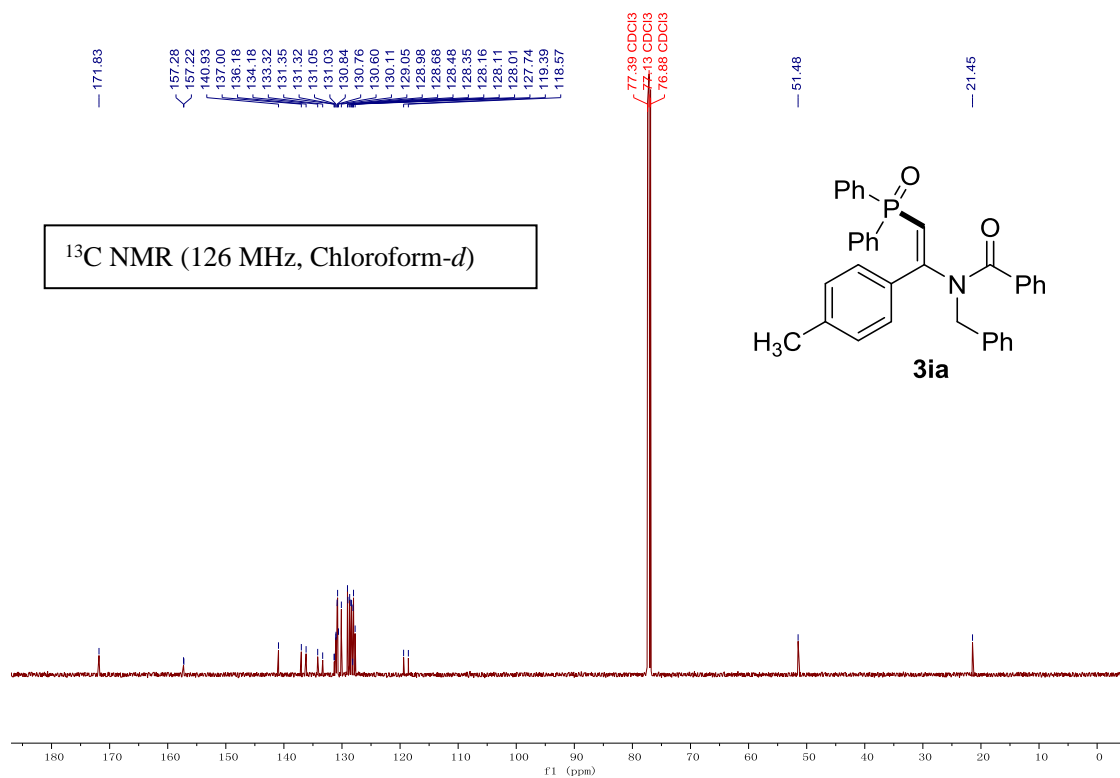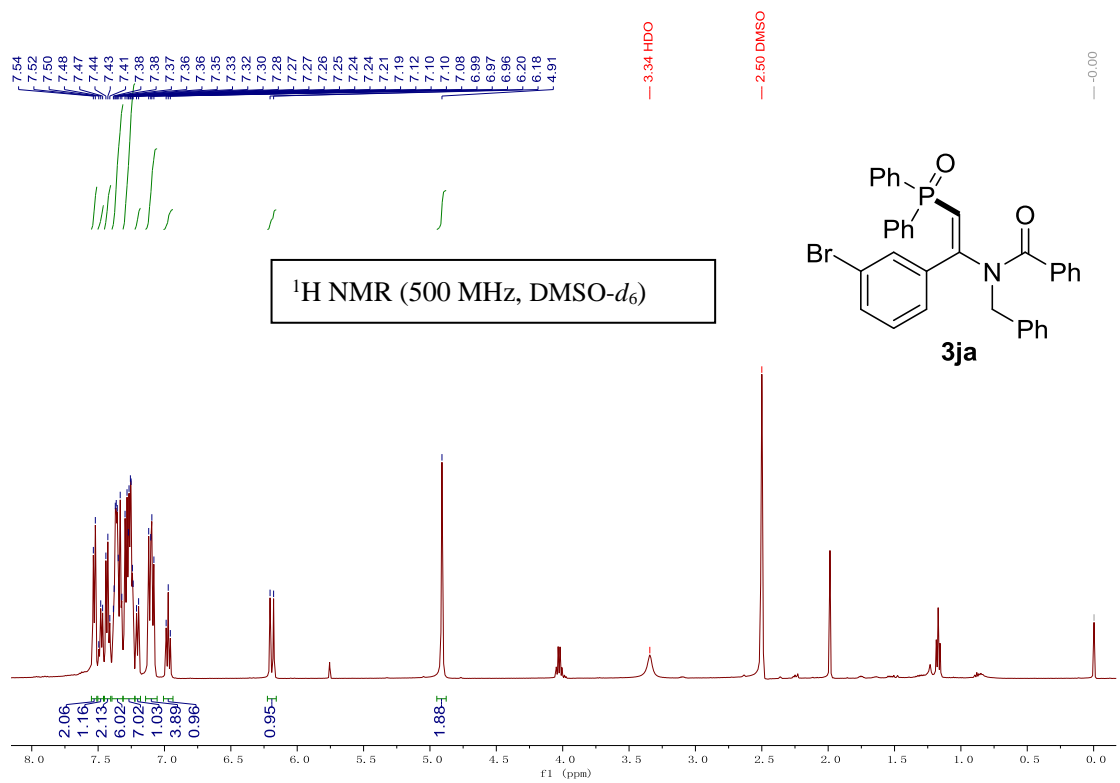

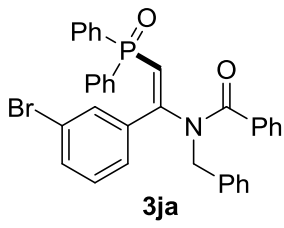

<sup>31</sup>P NMR (202 MHz, DMSO-*d*<sub>6</sub>)

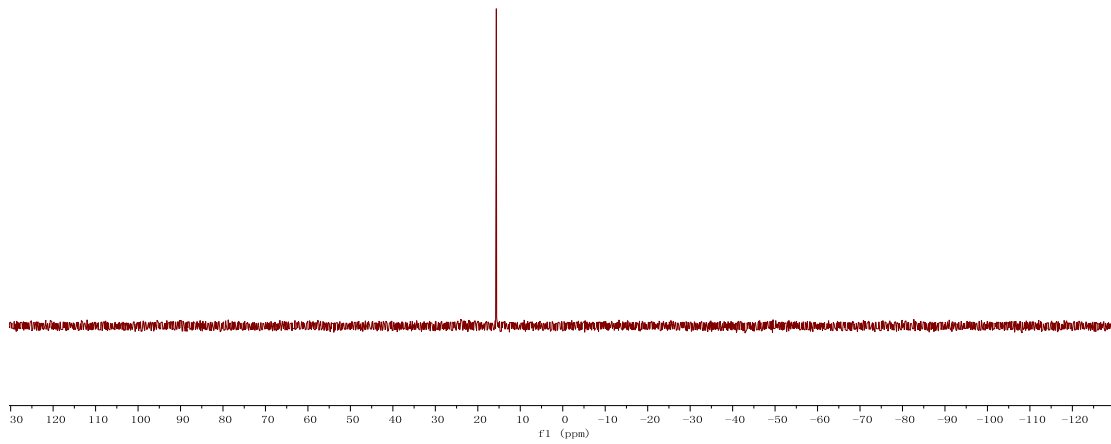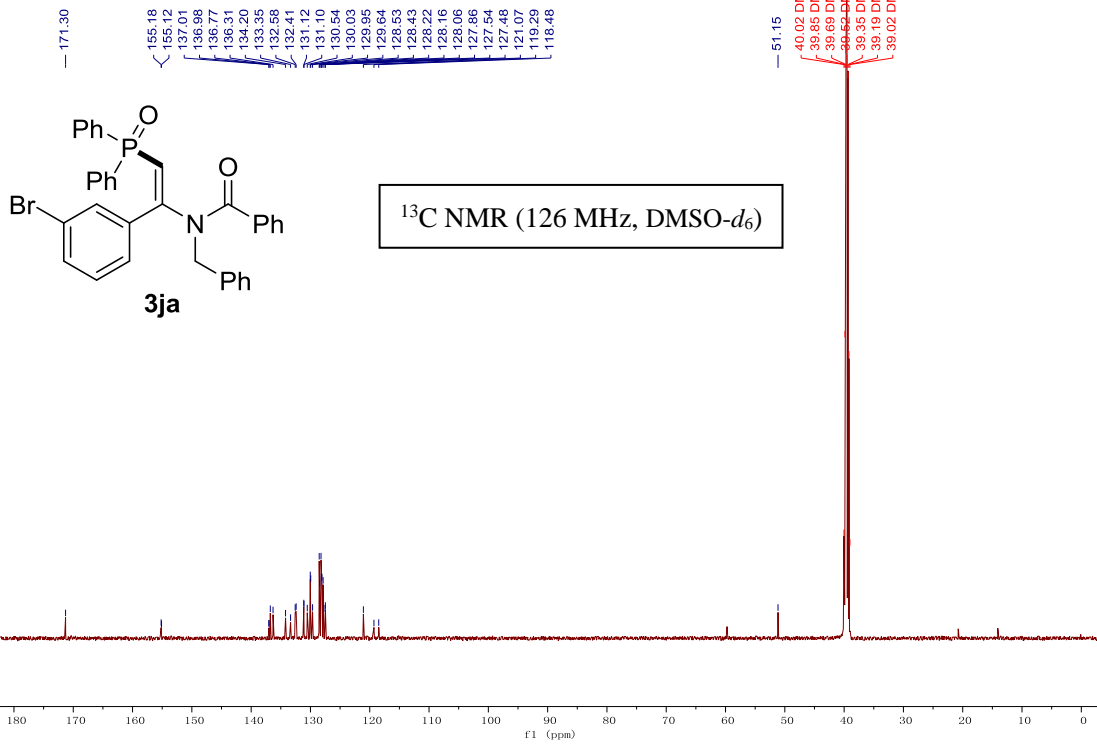

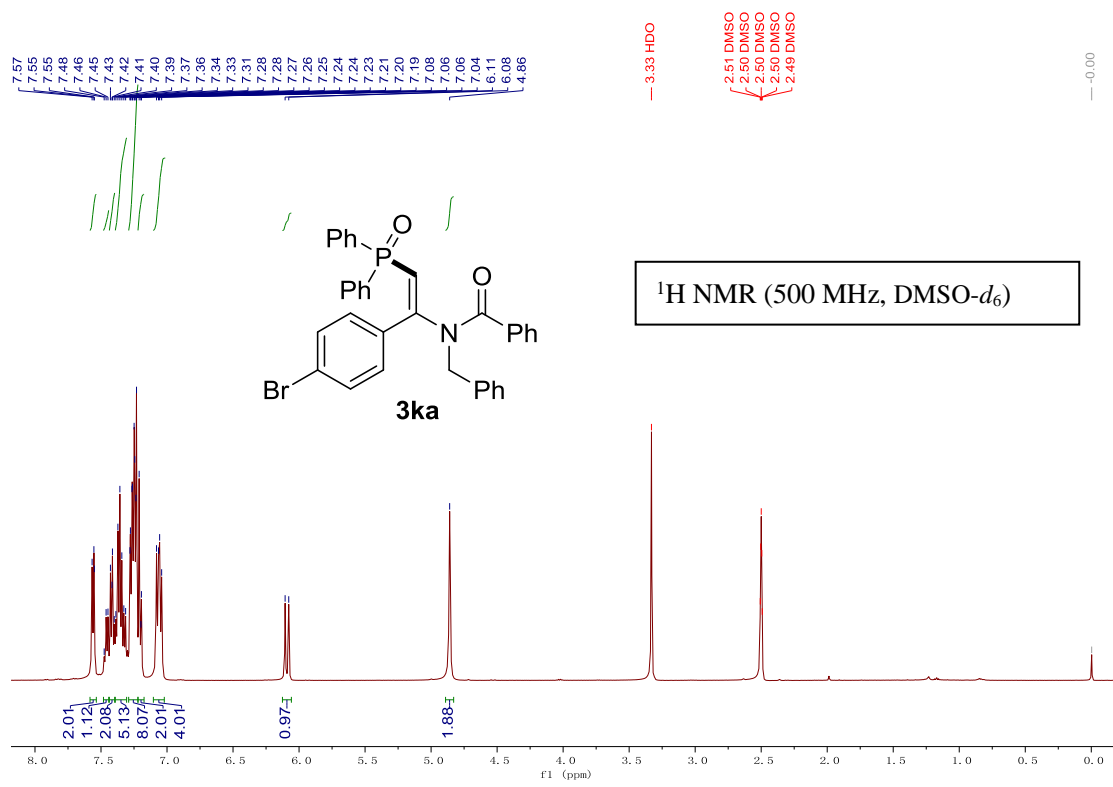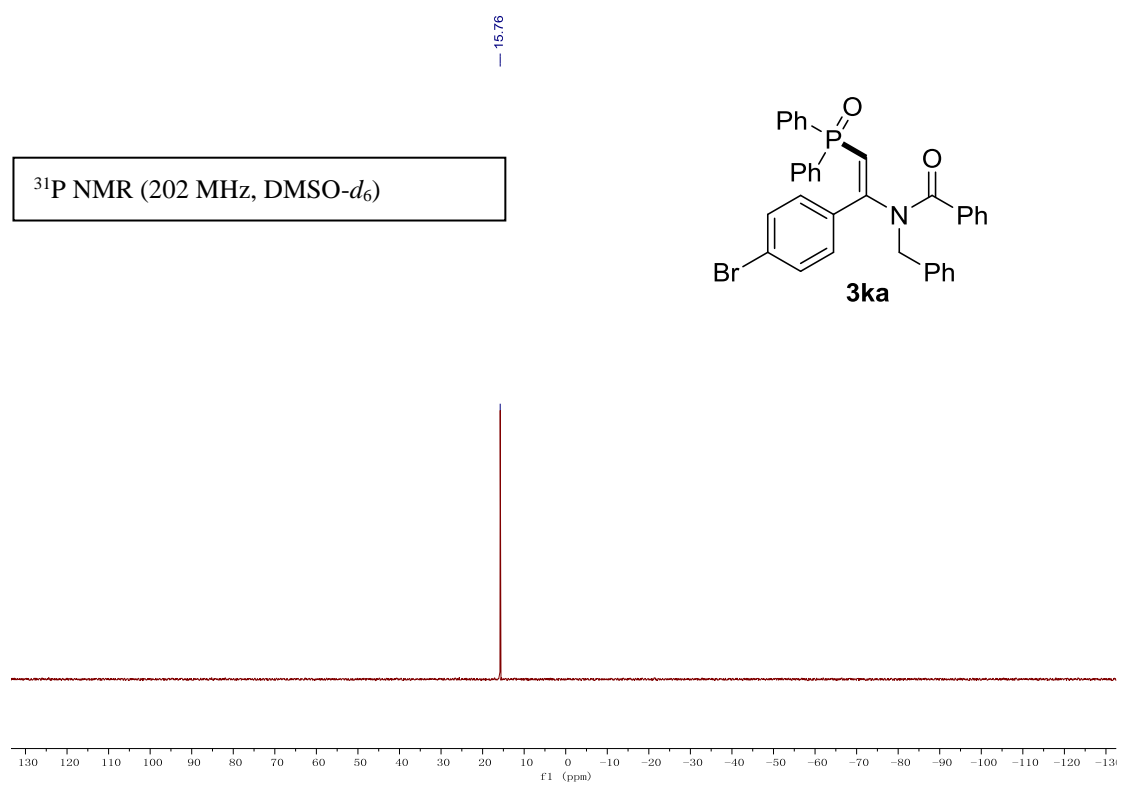

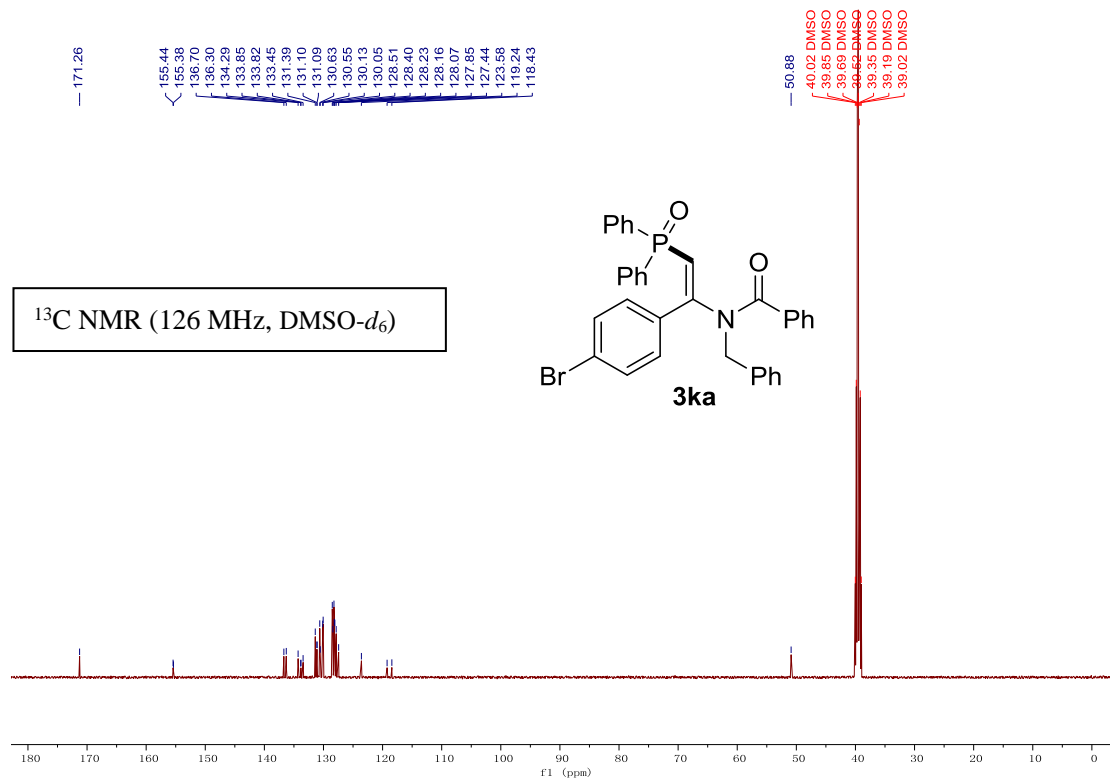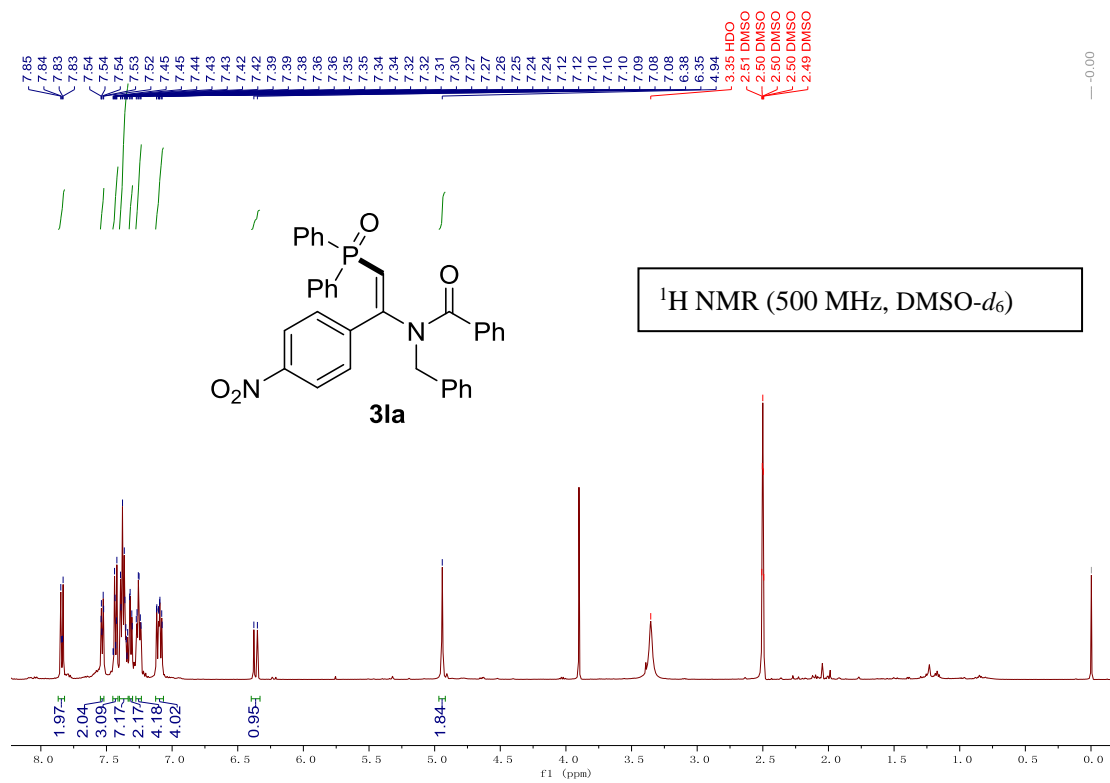

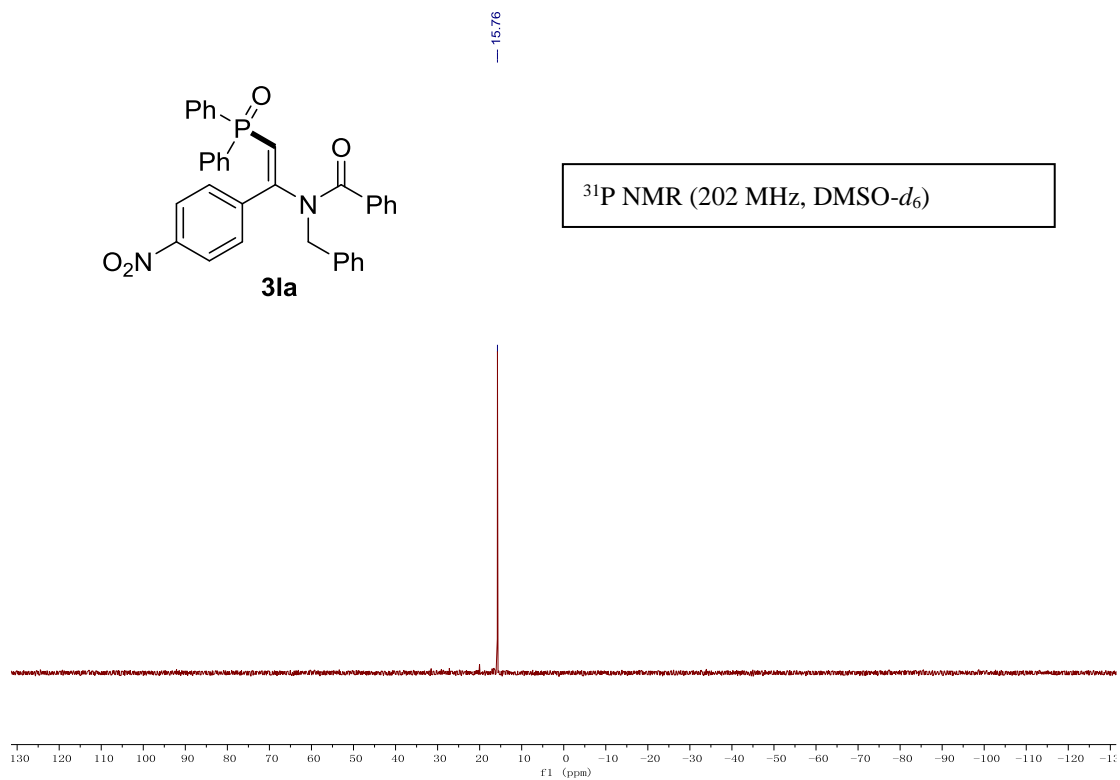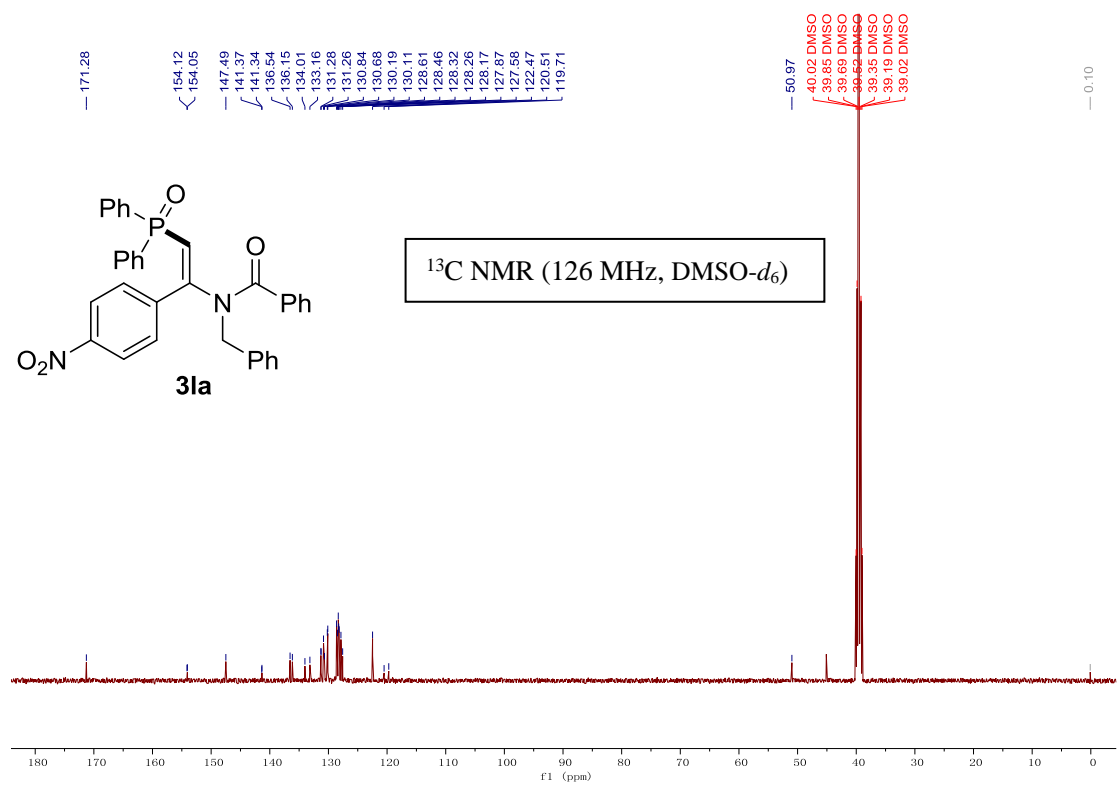

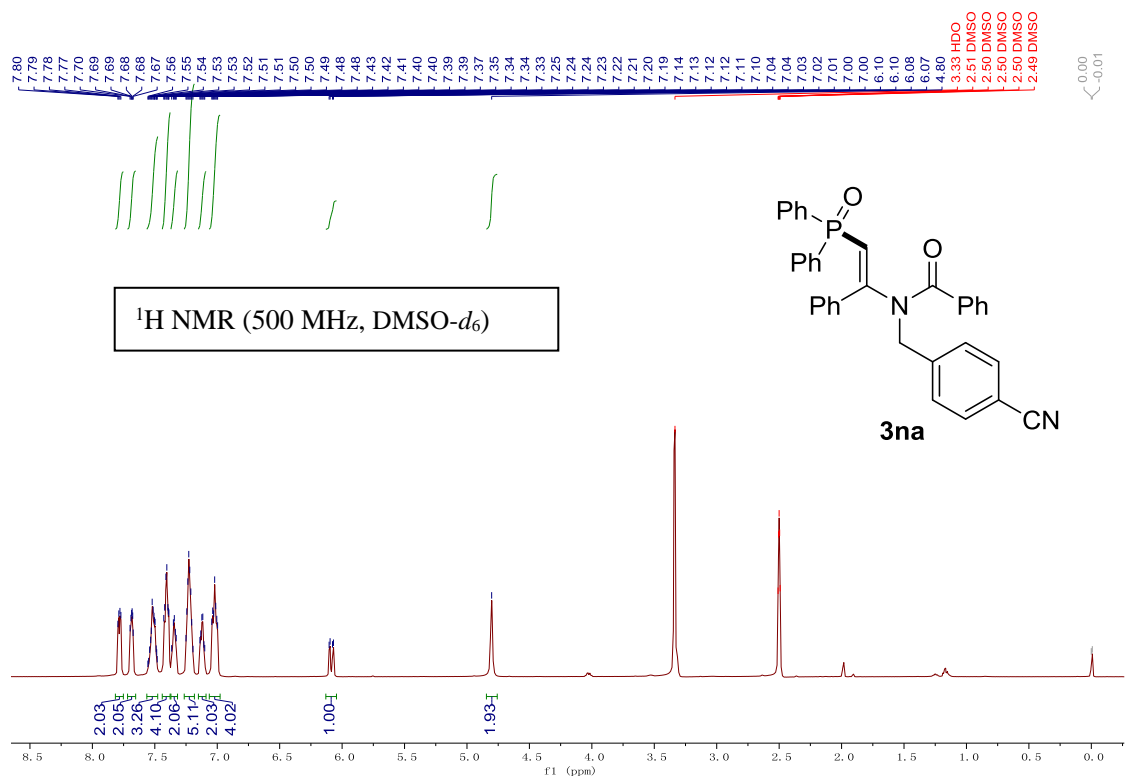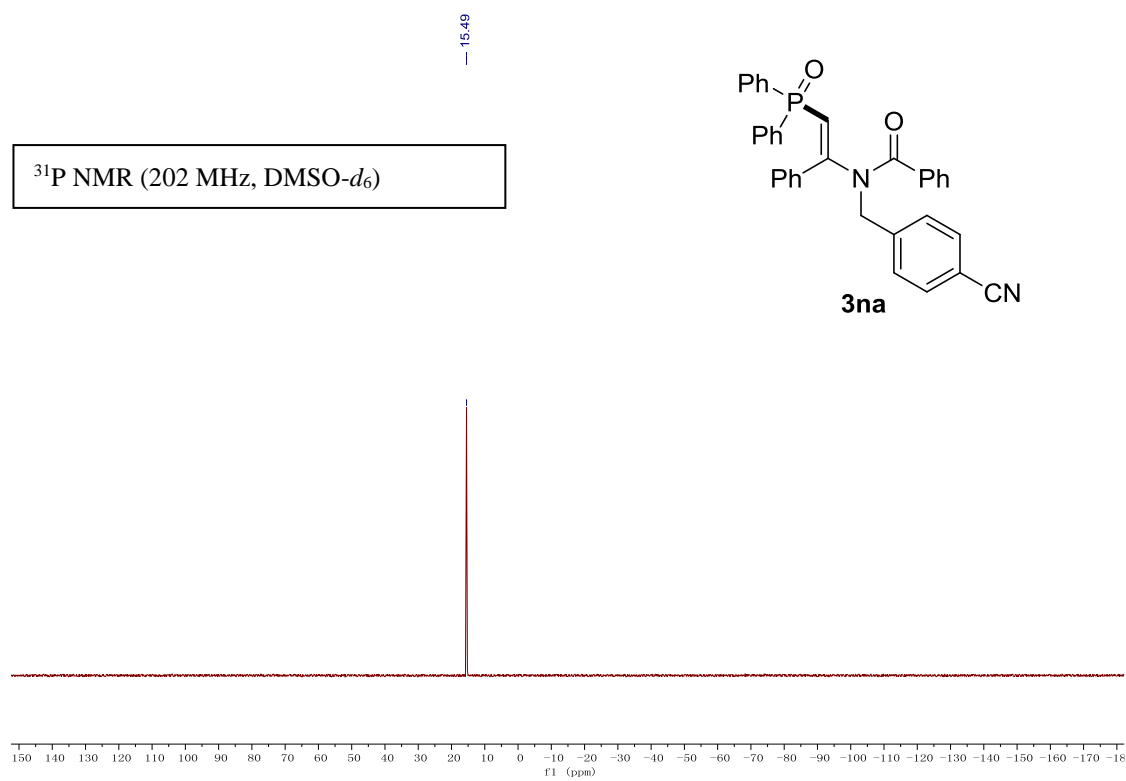

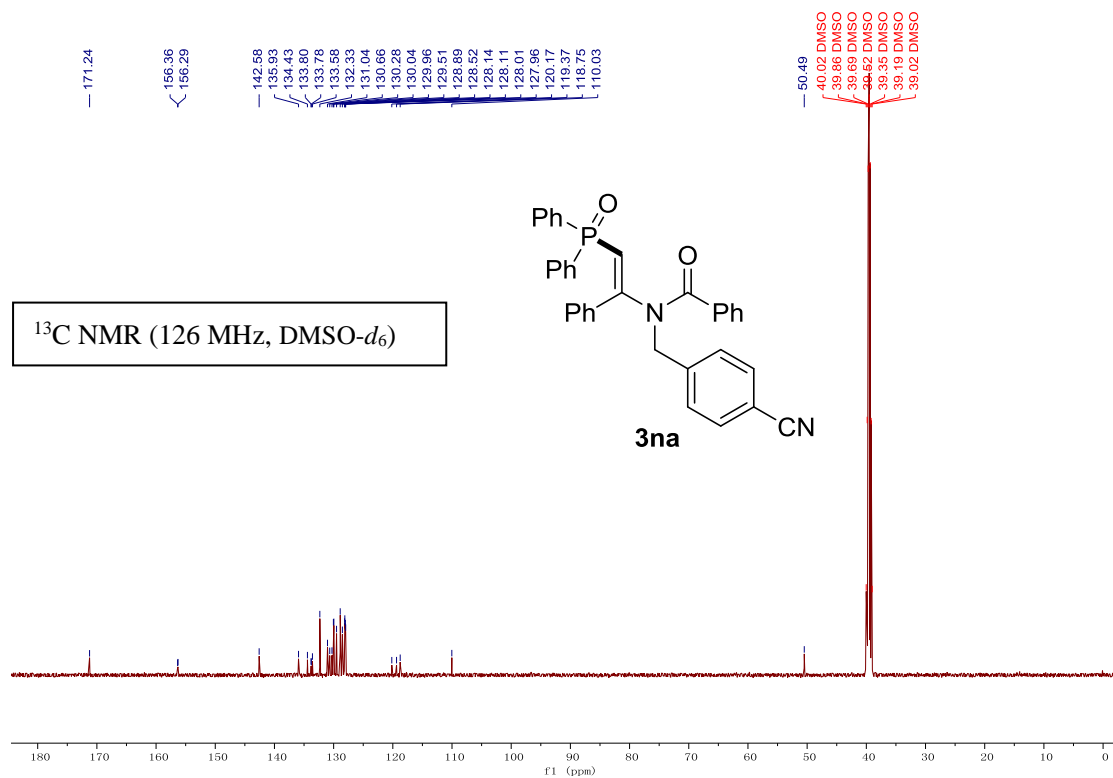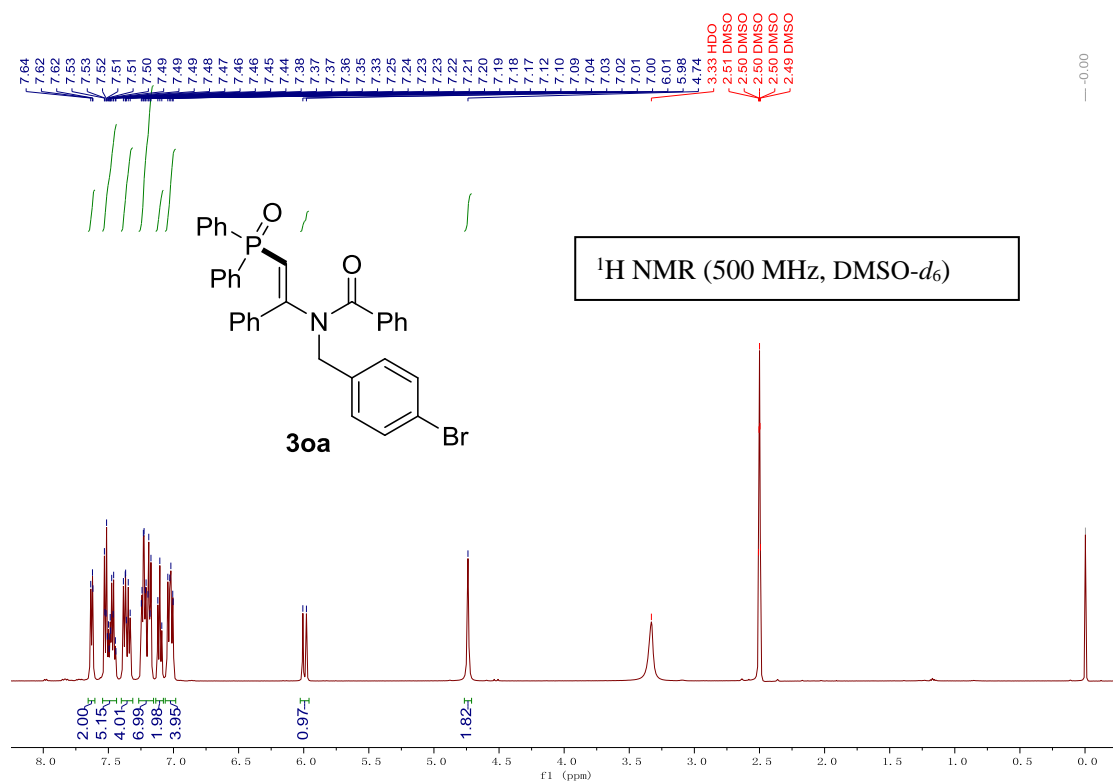



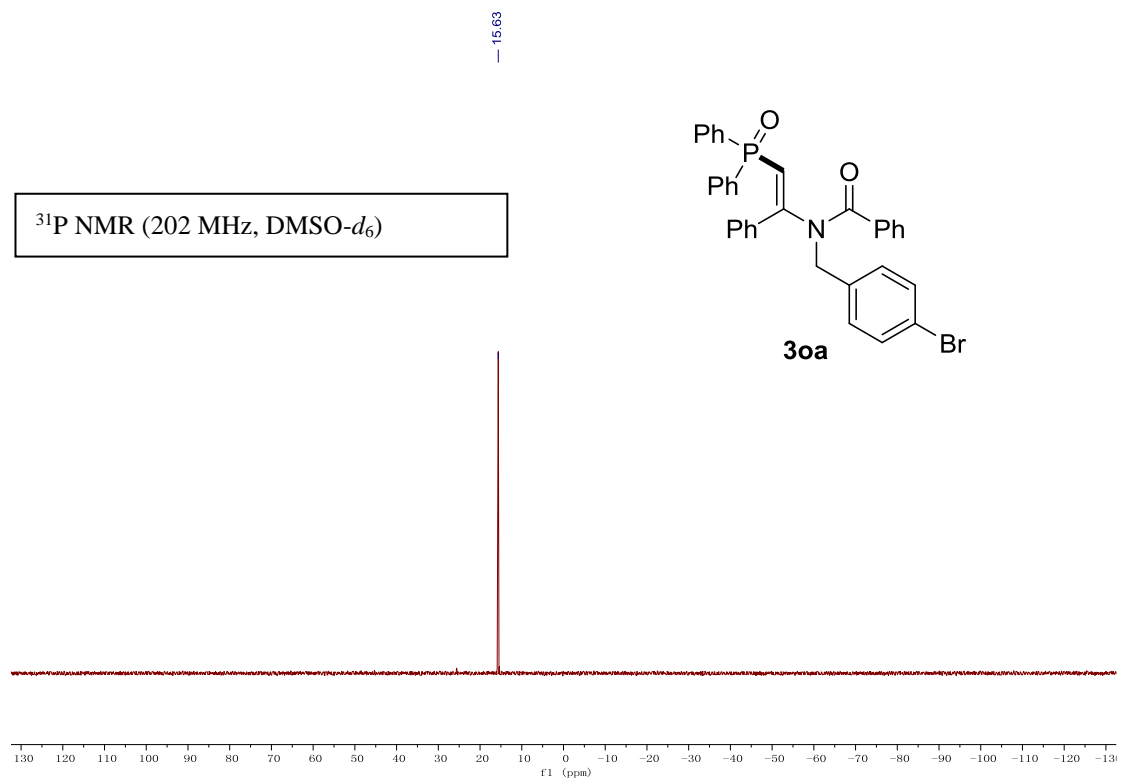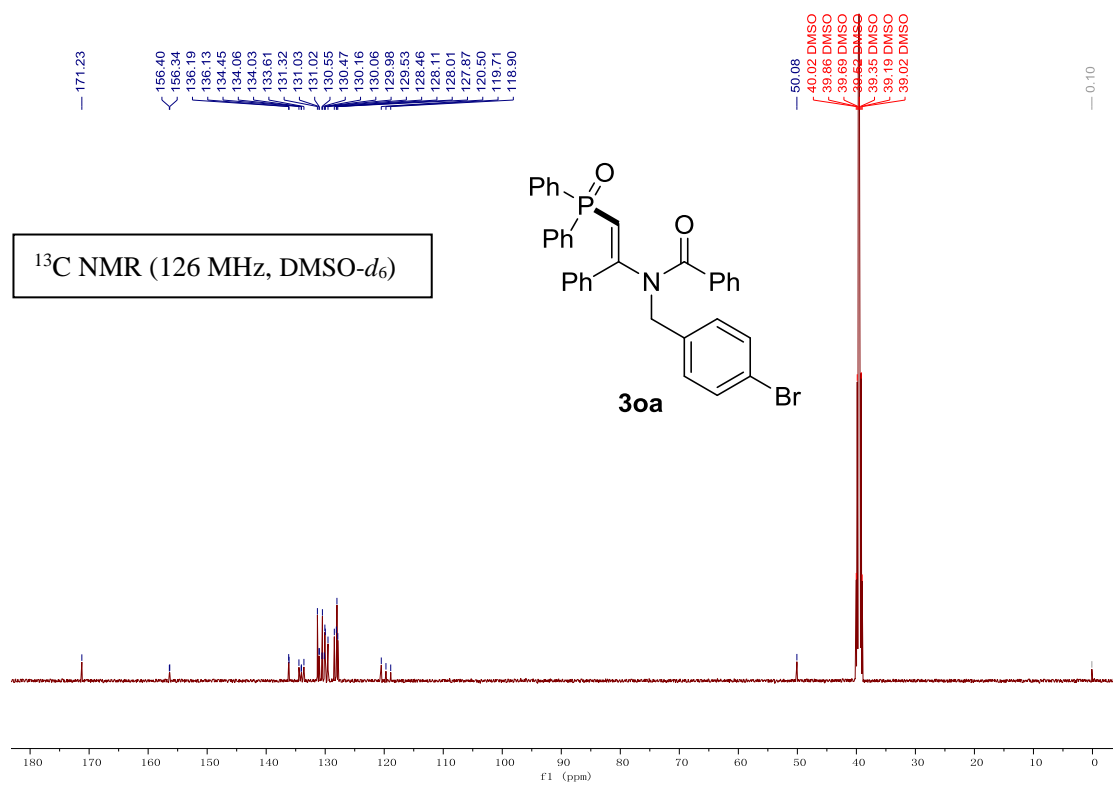

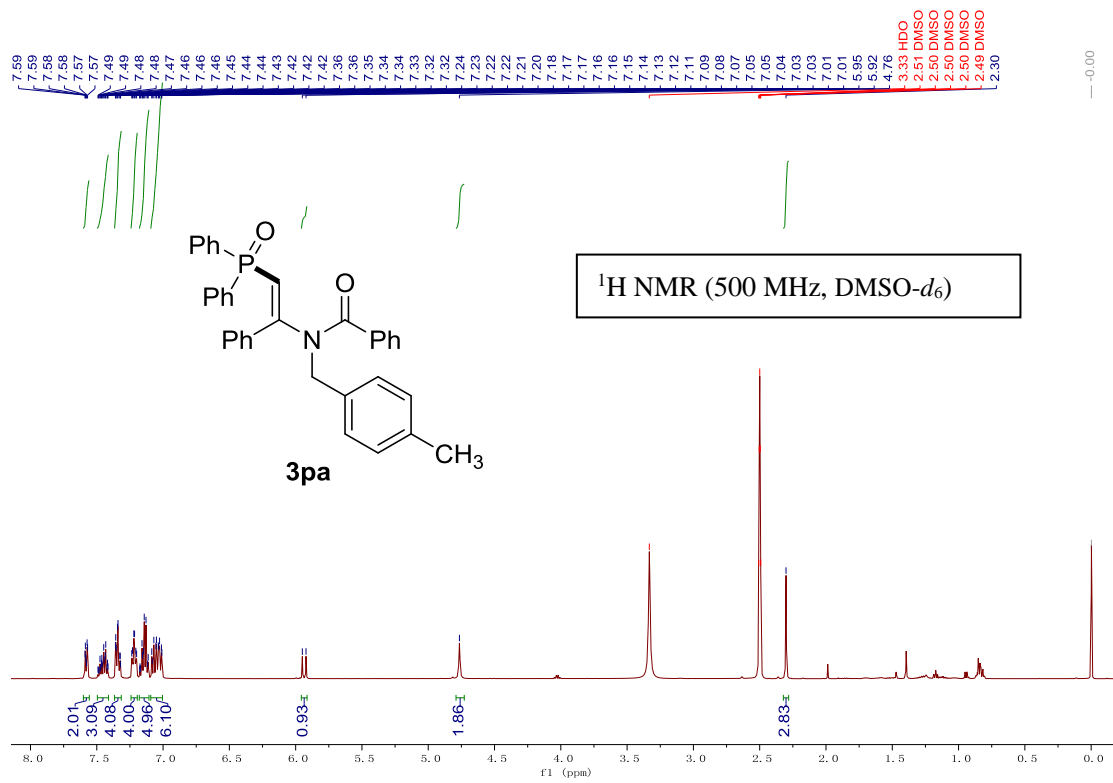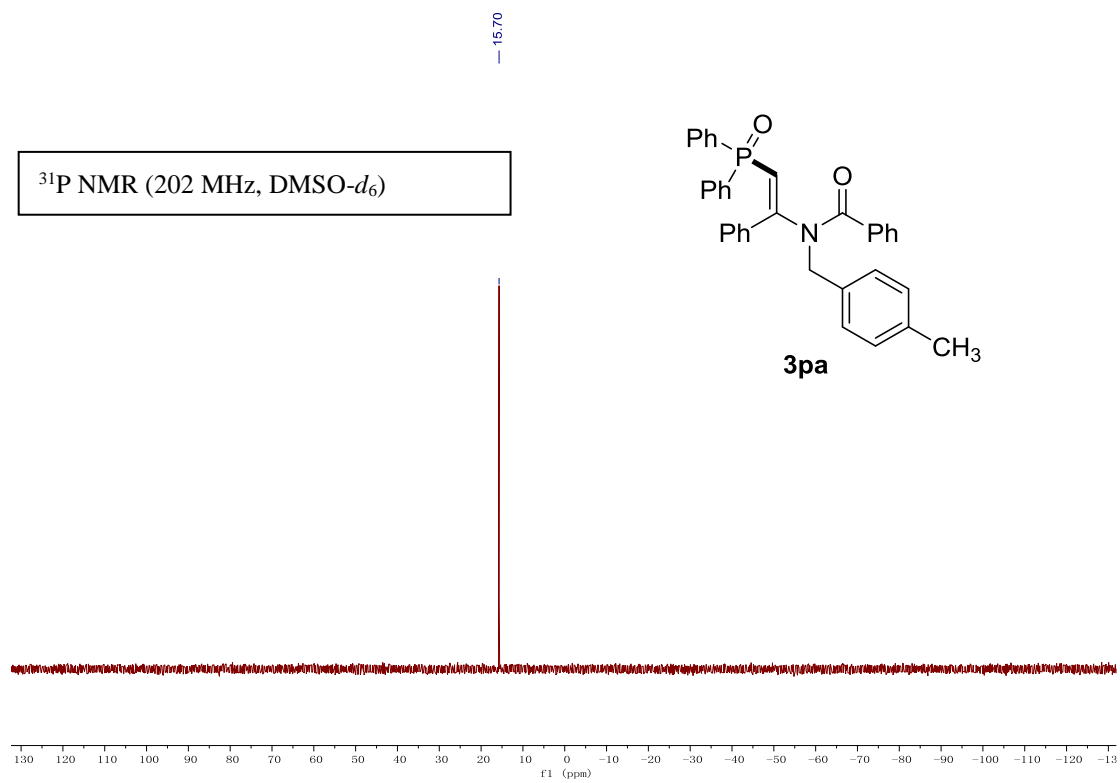

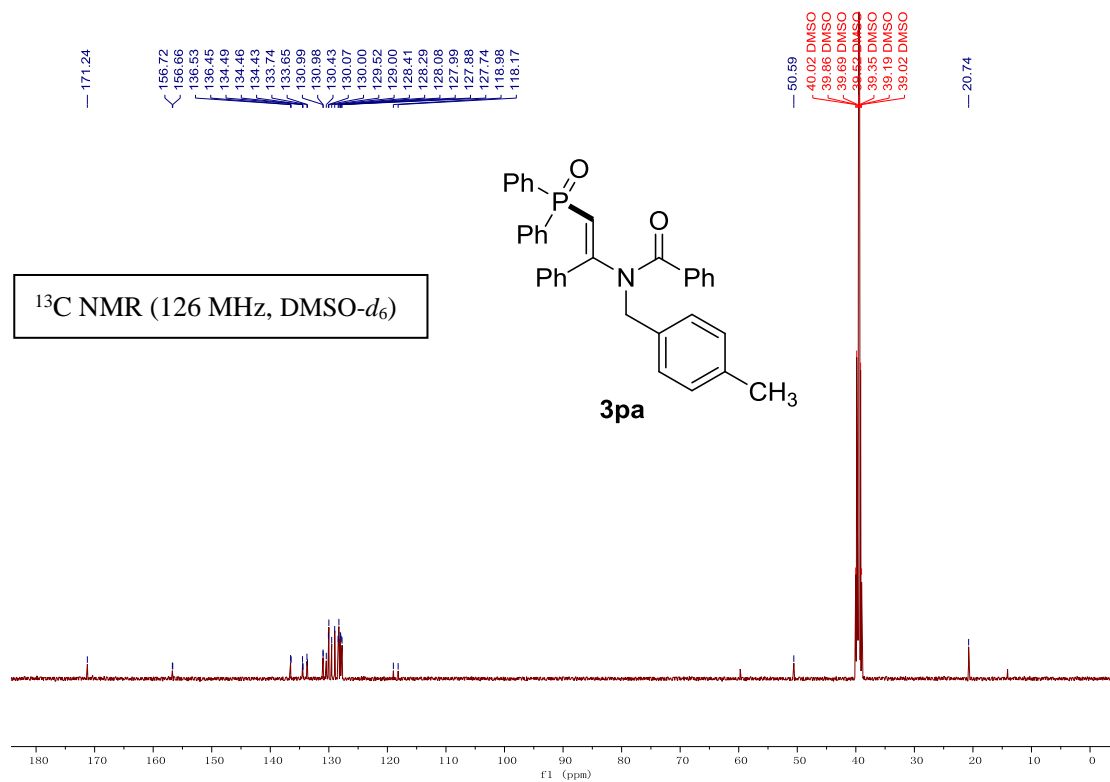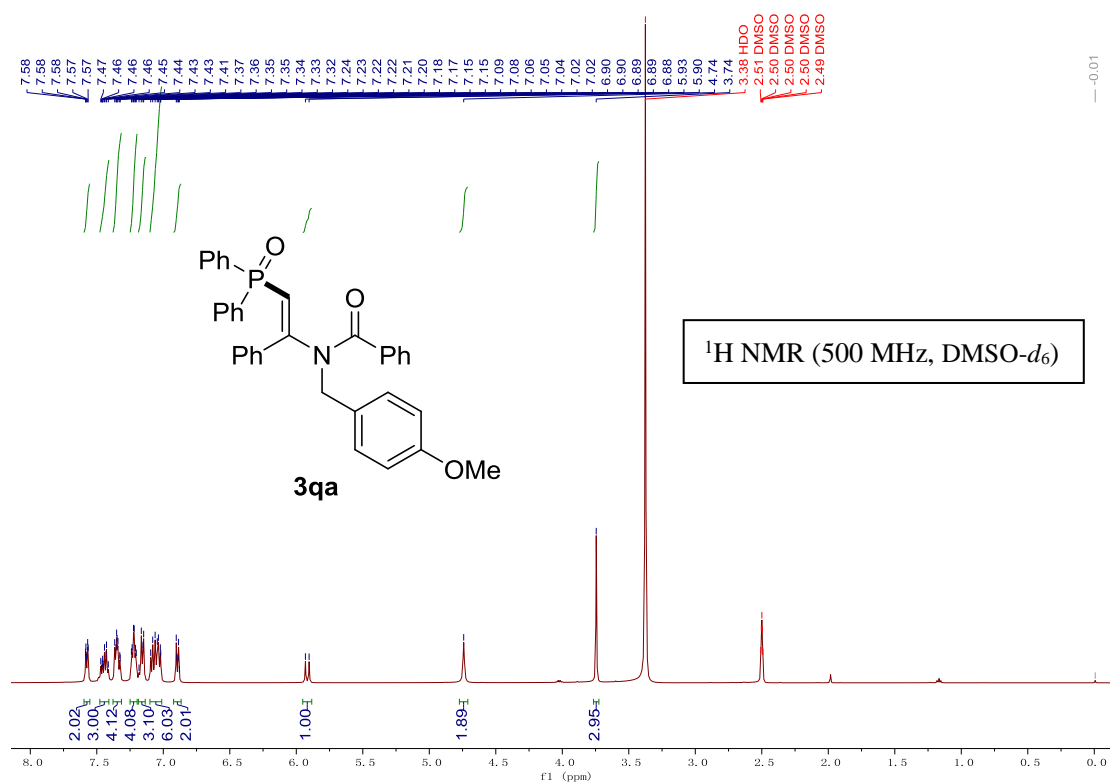

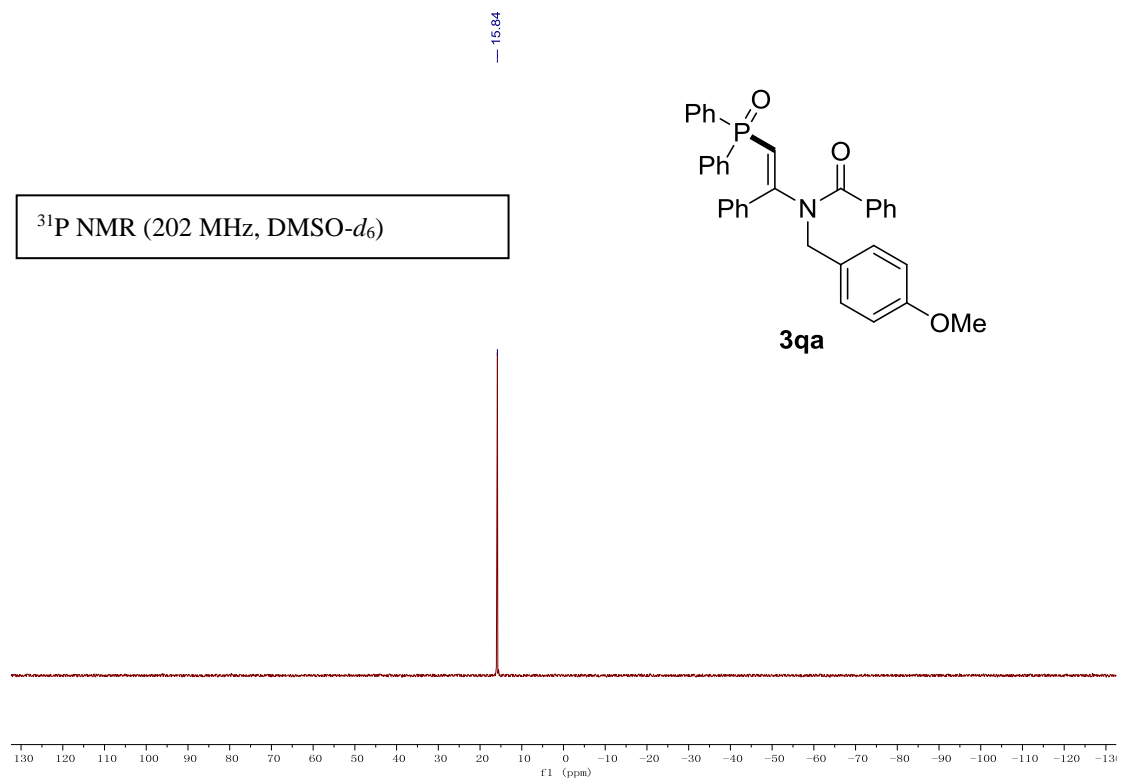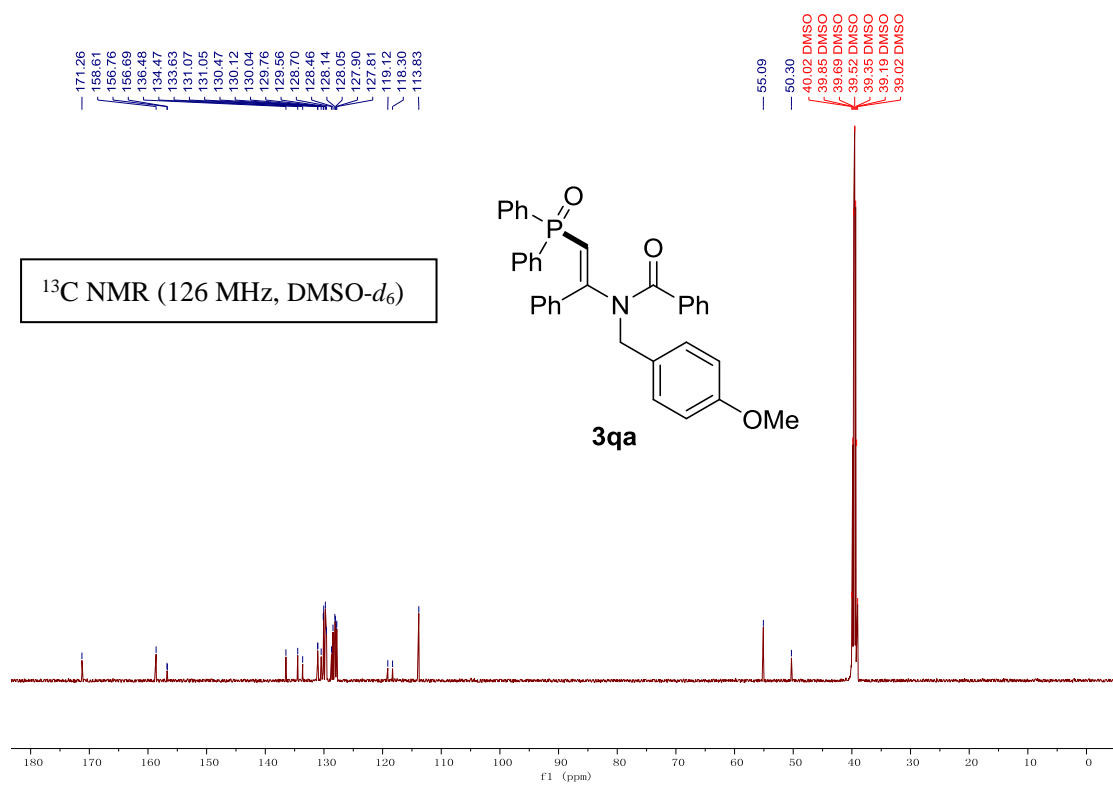

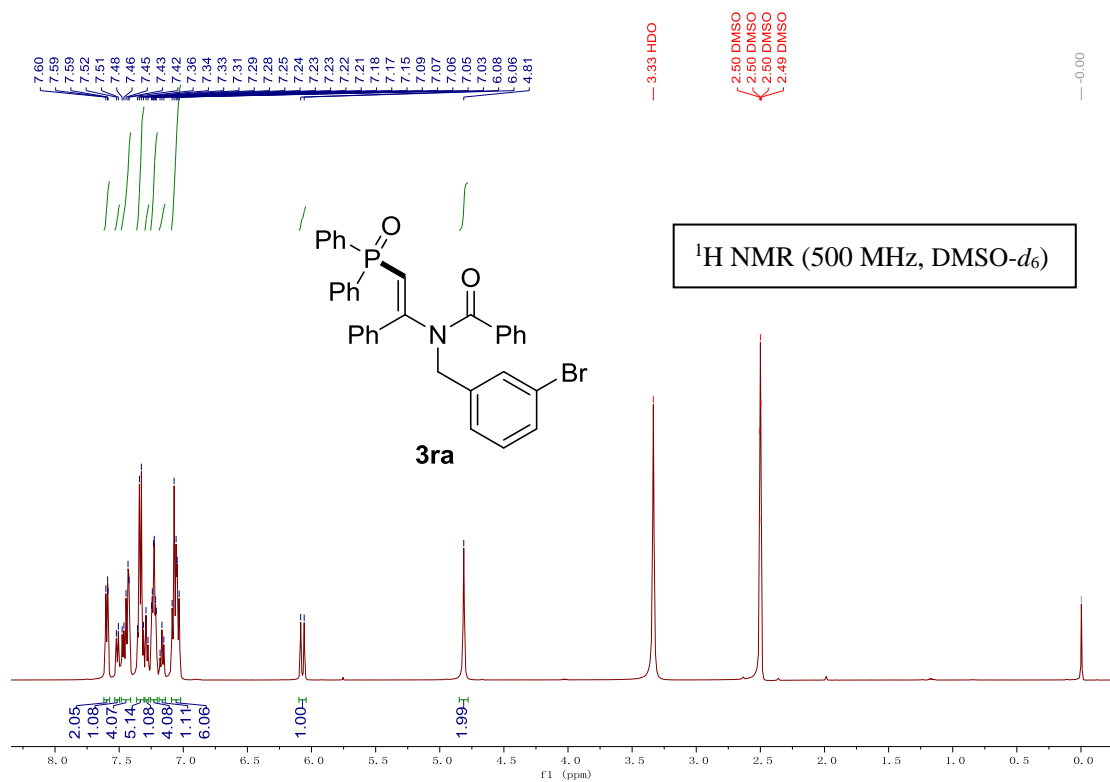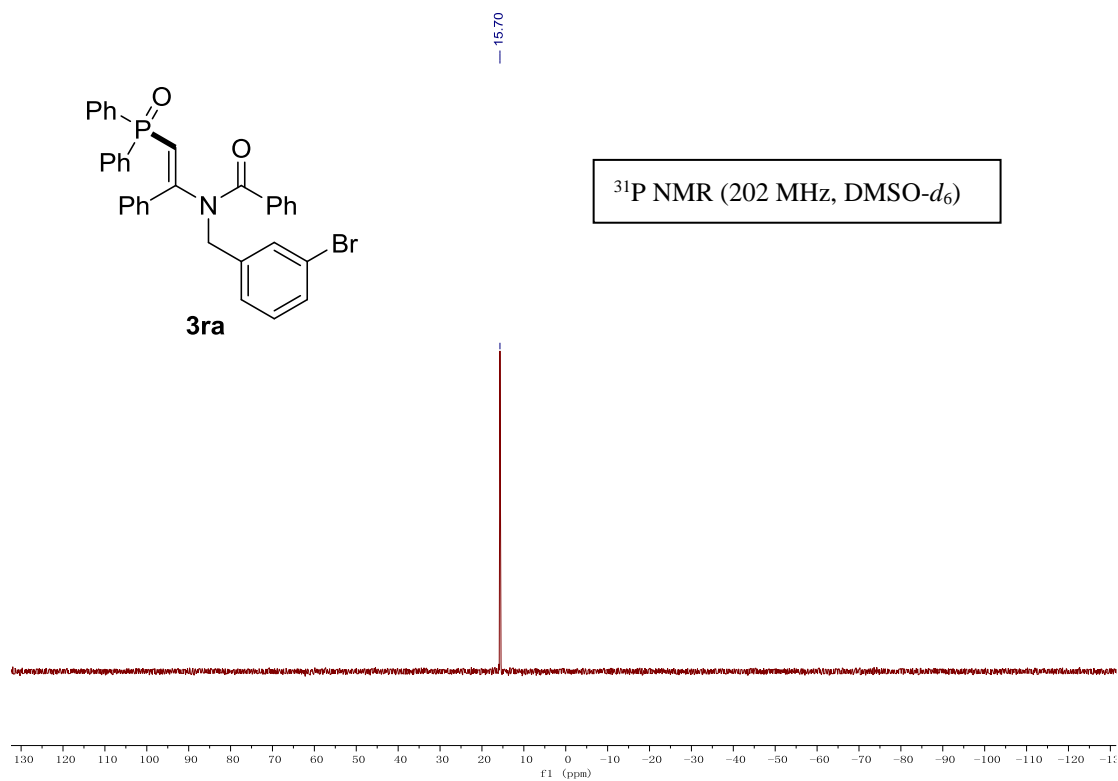

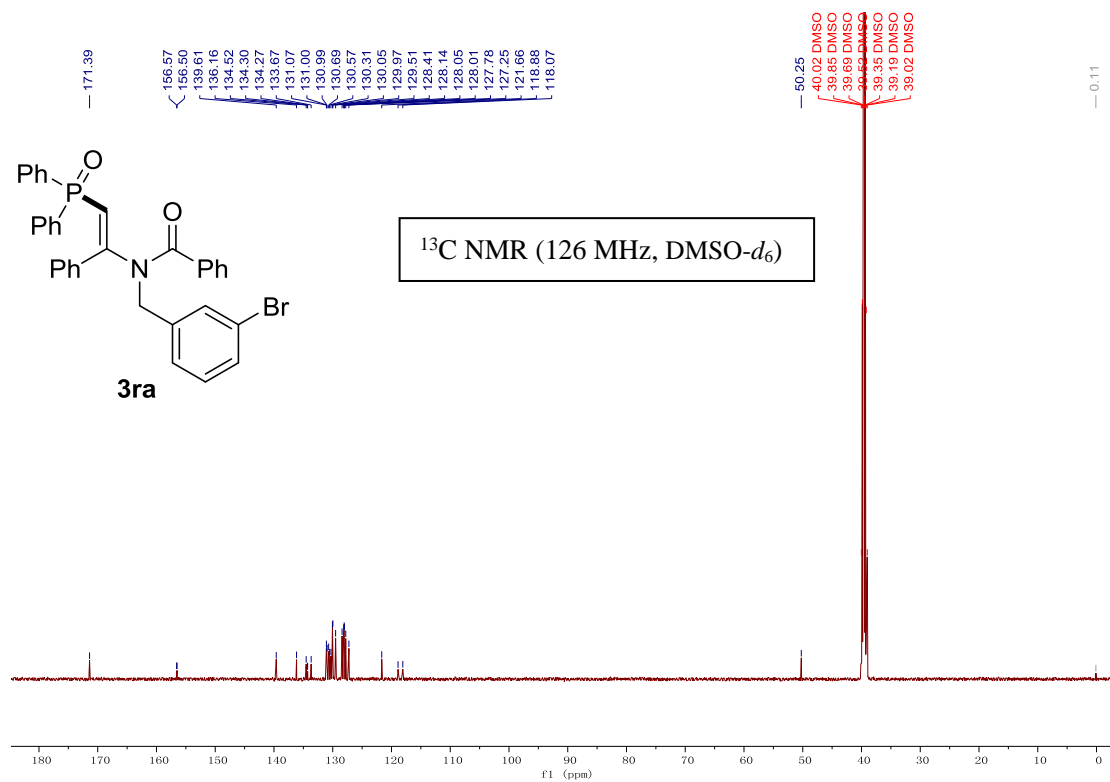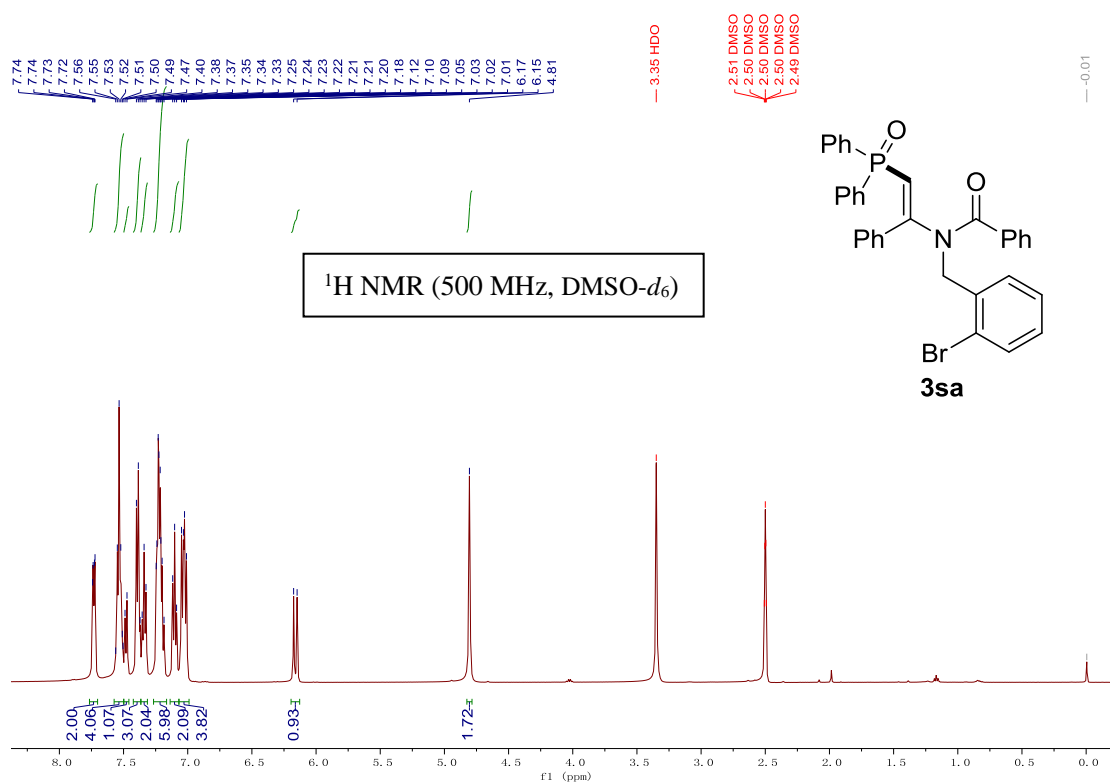

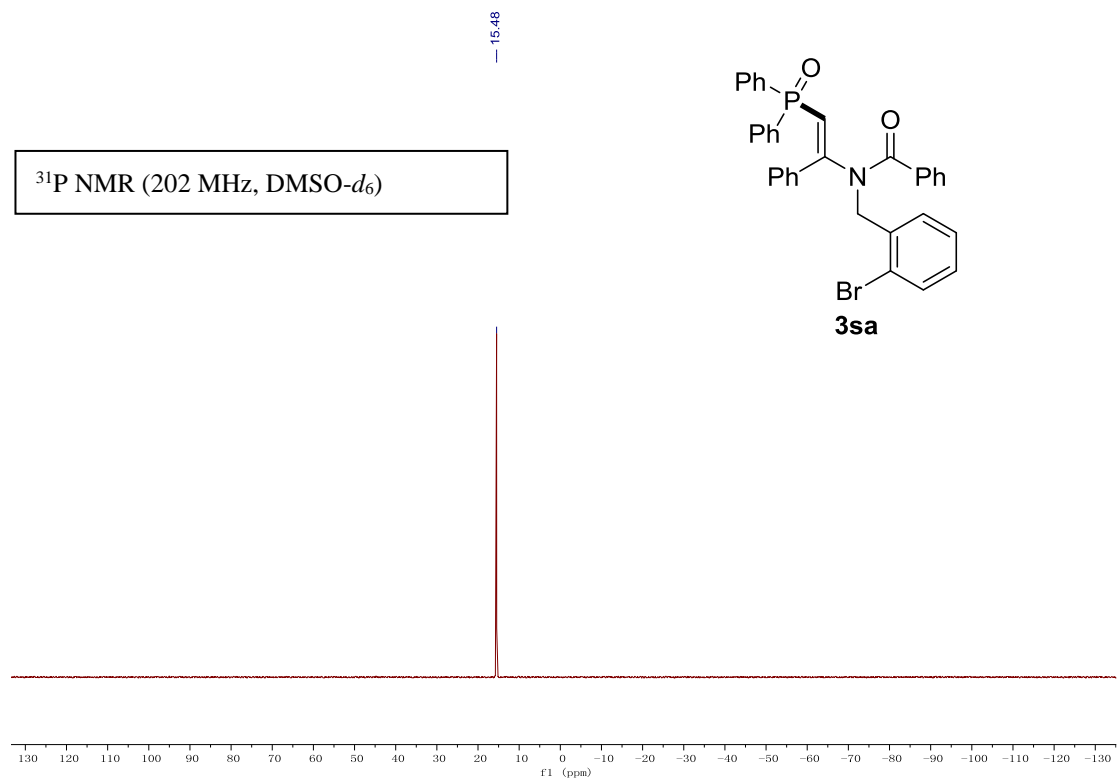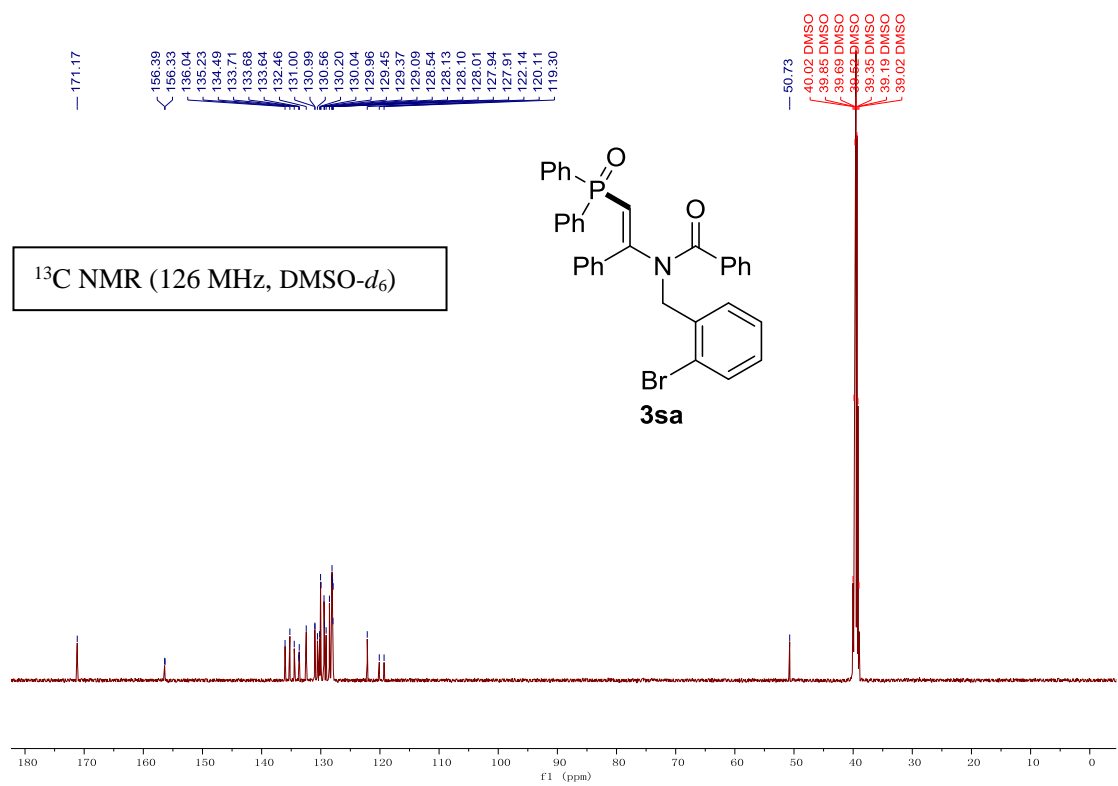

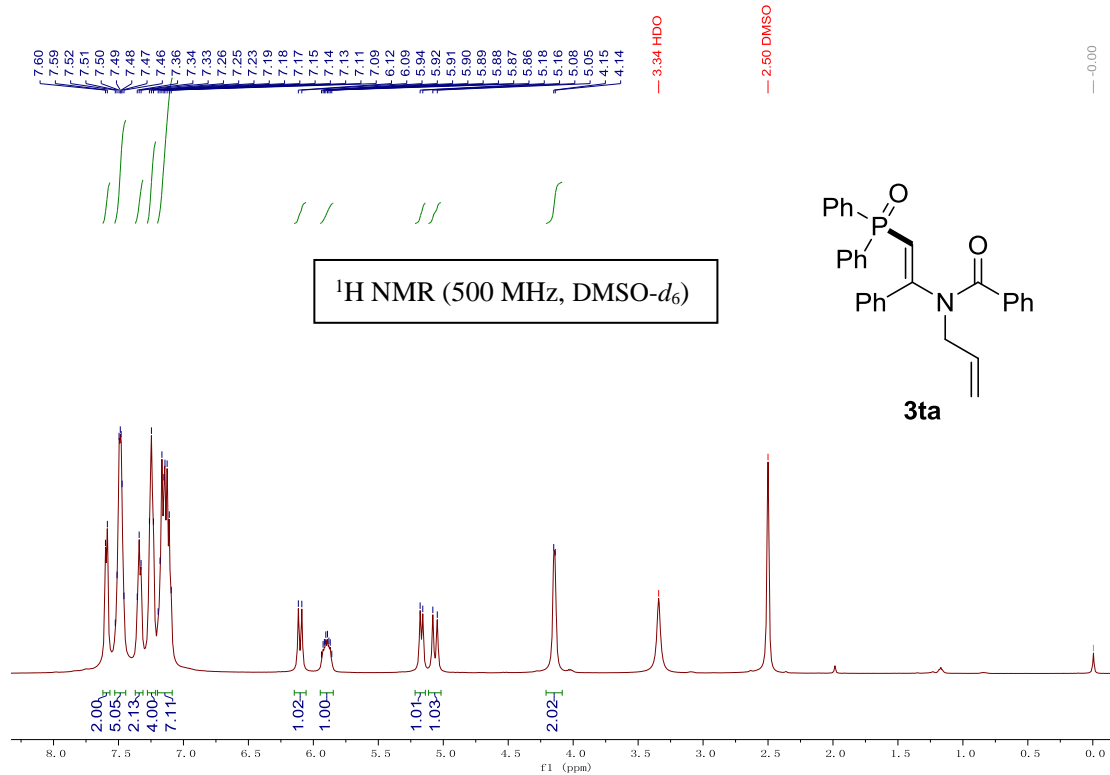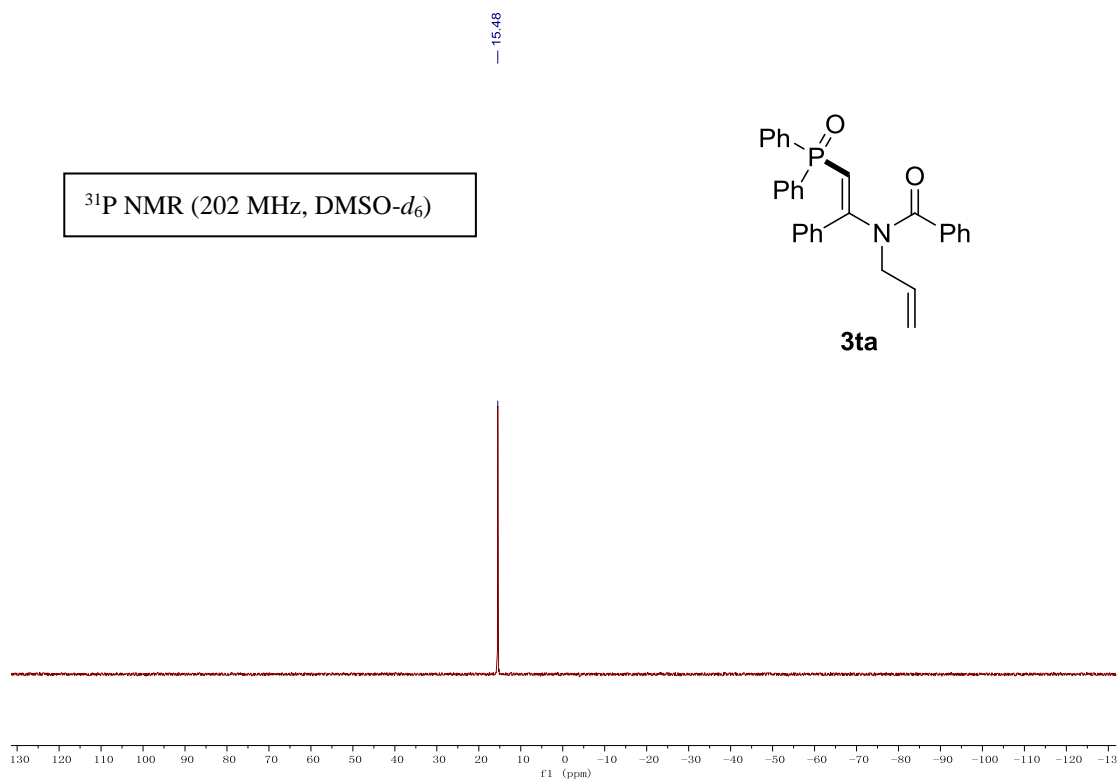



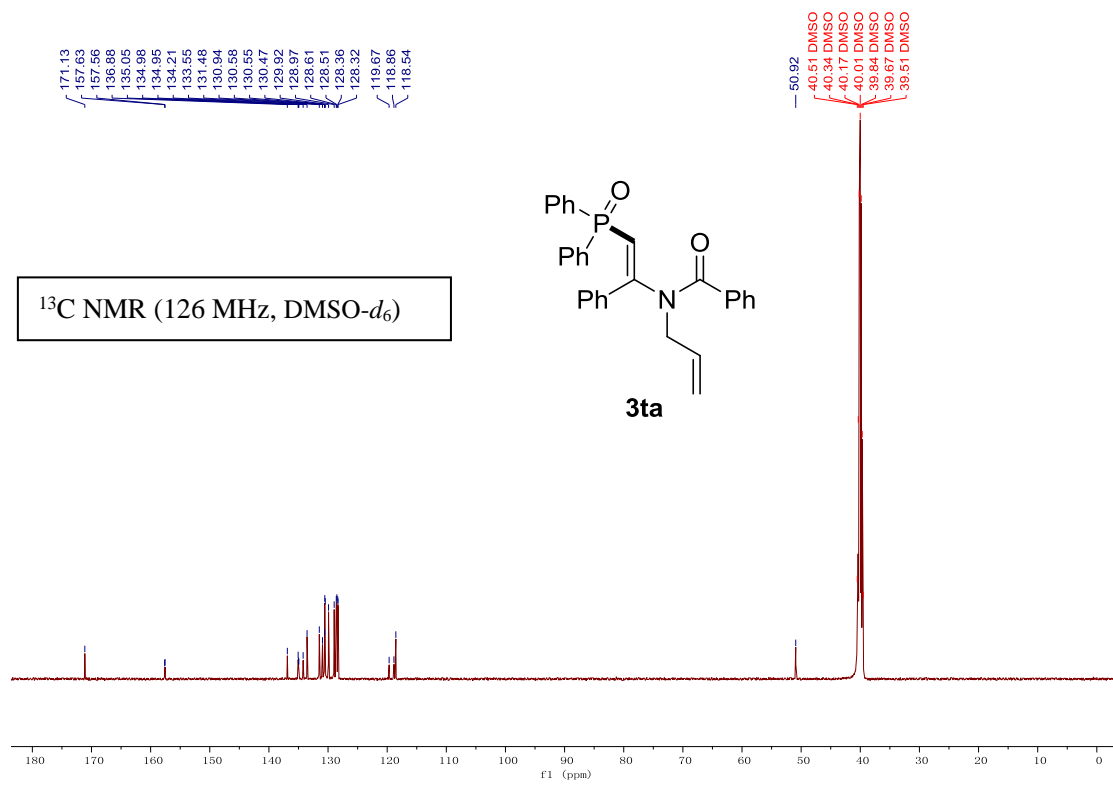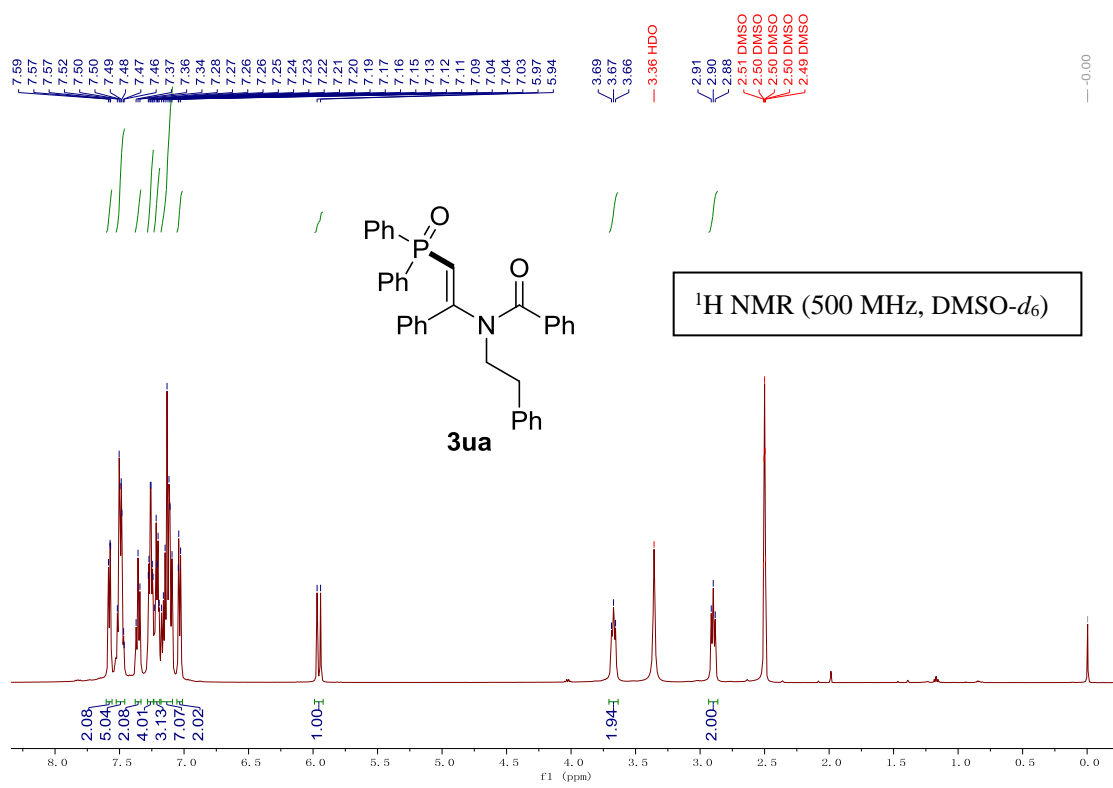

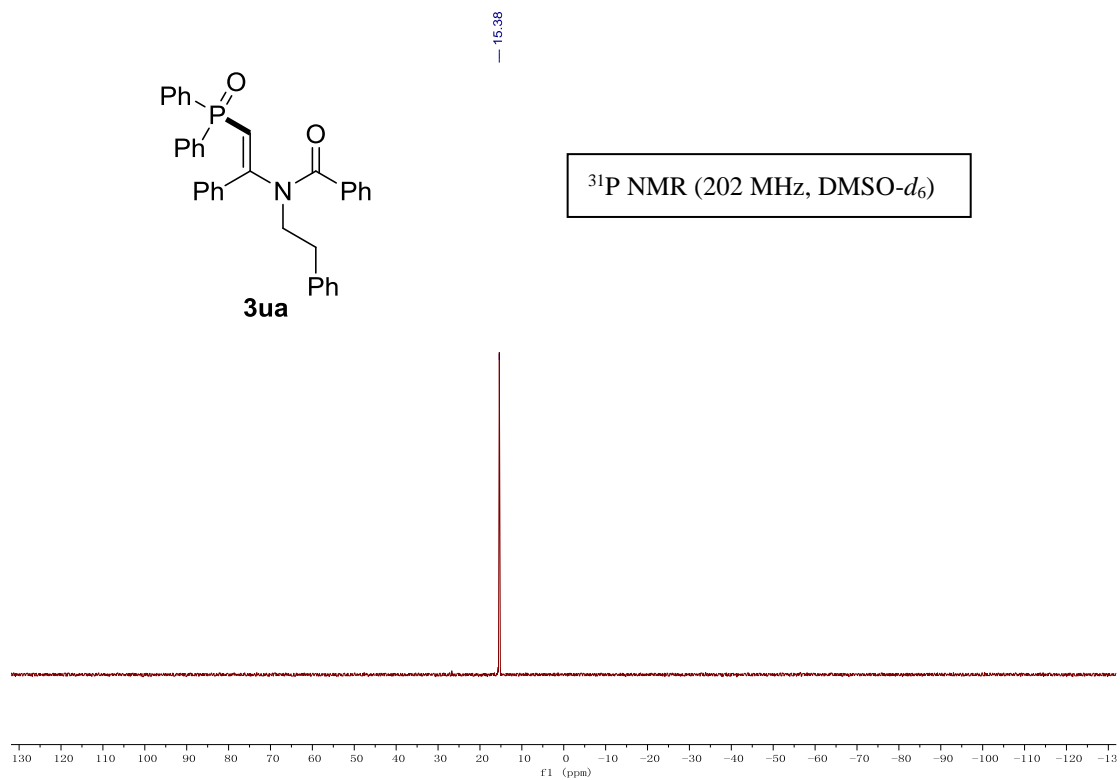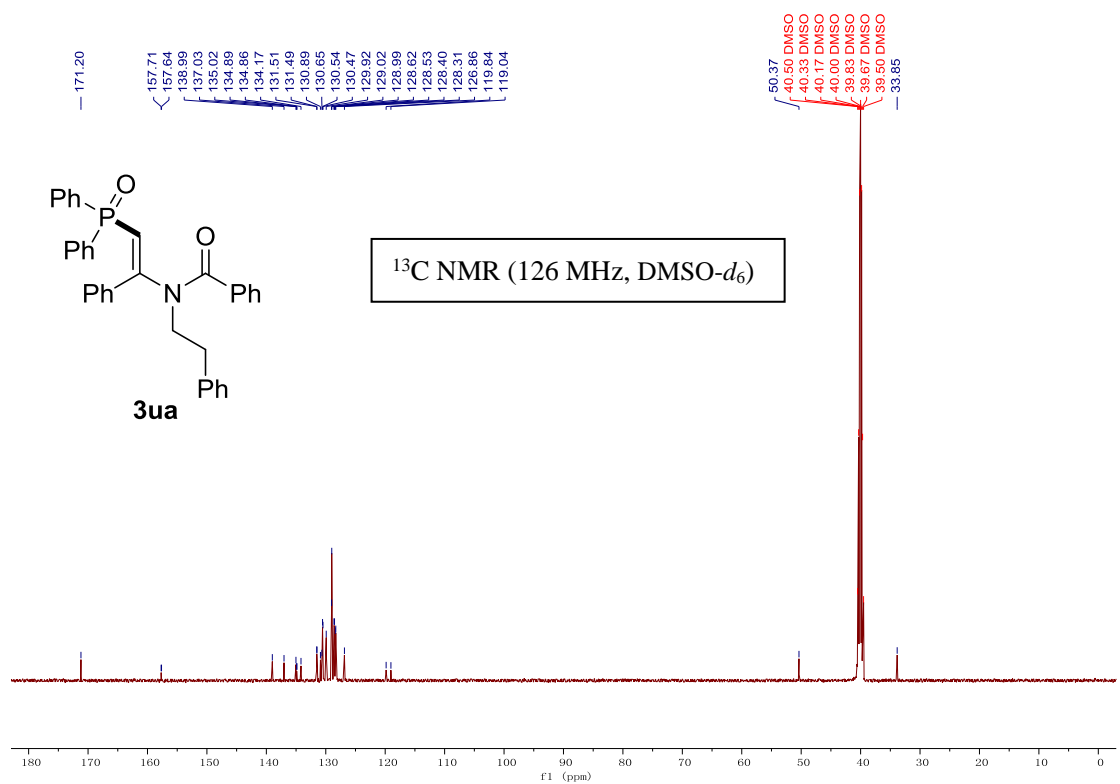

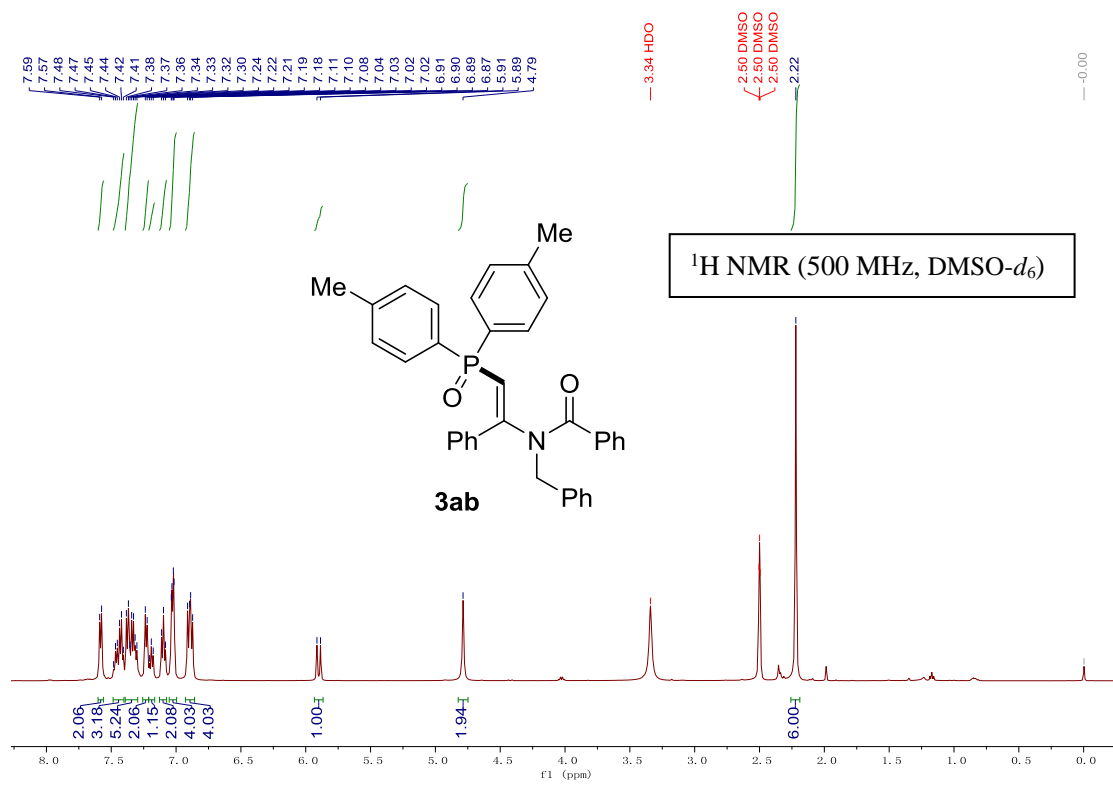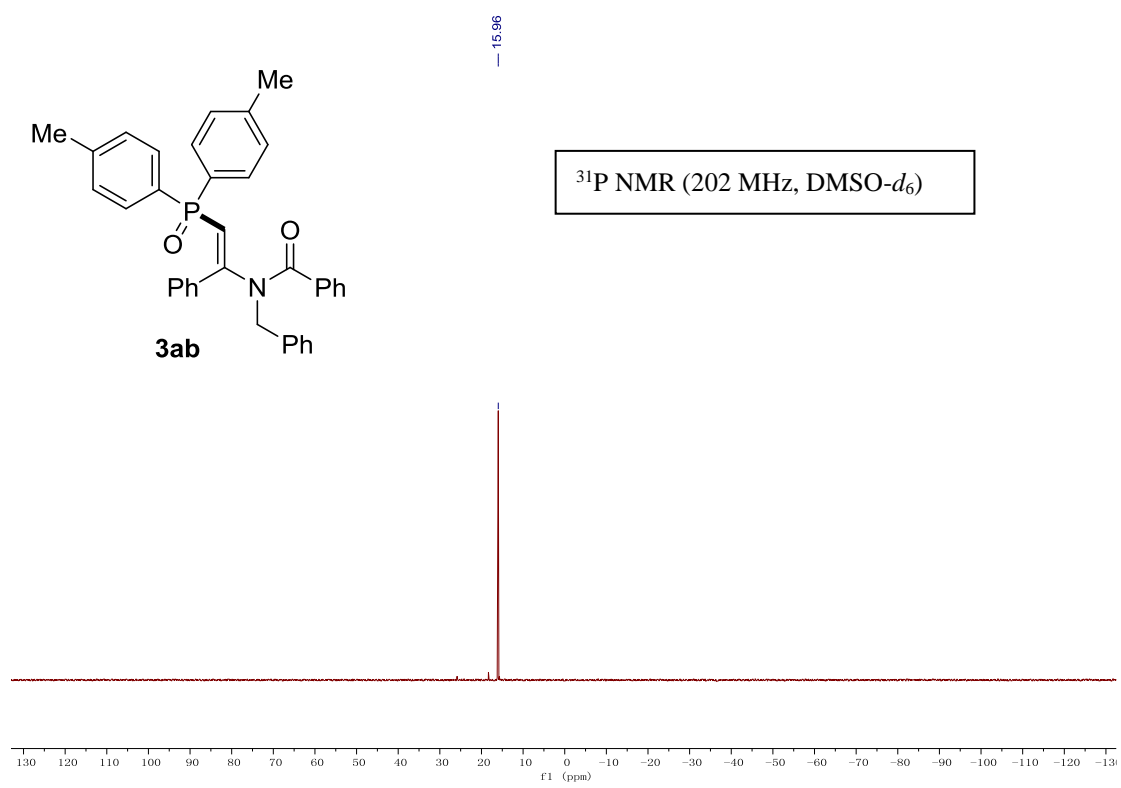

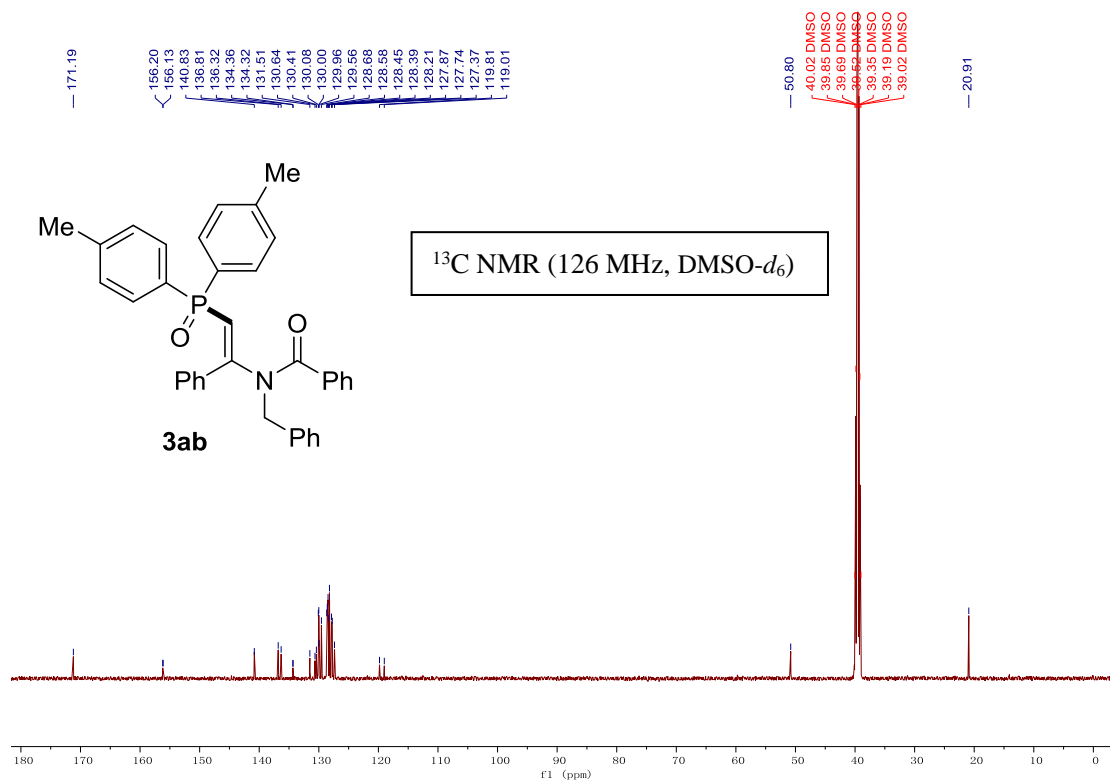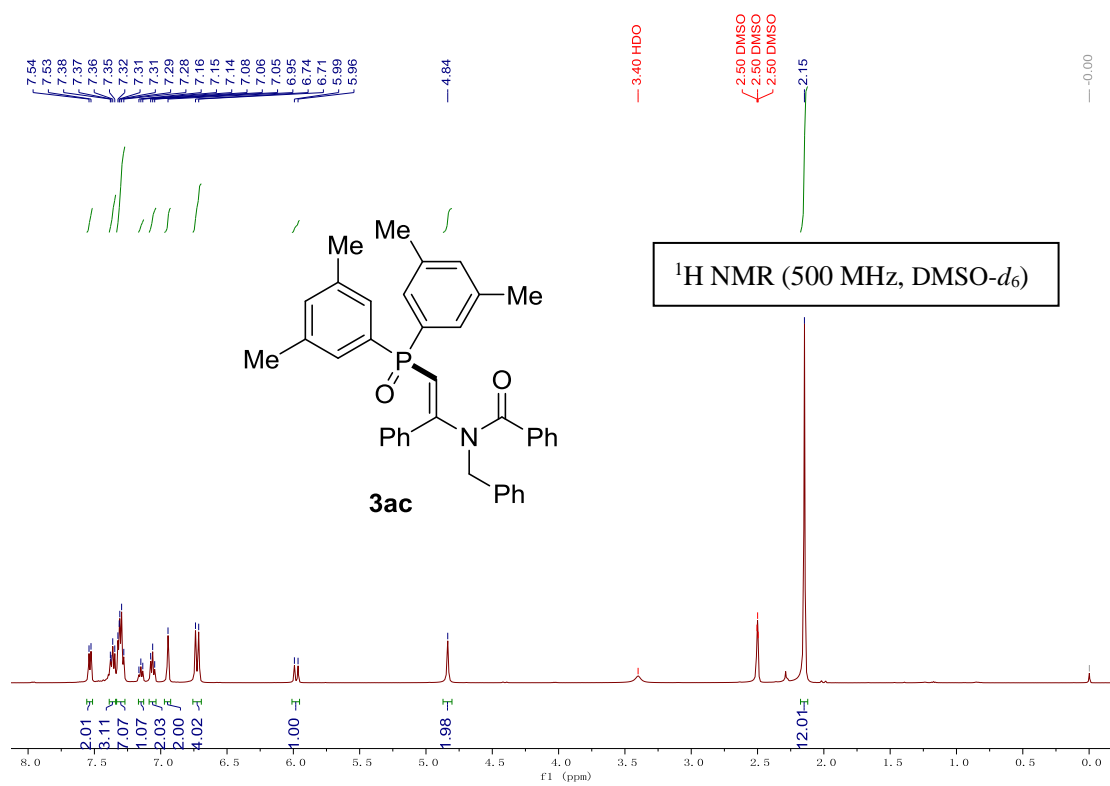

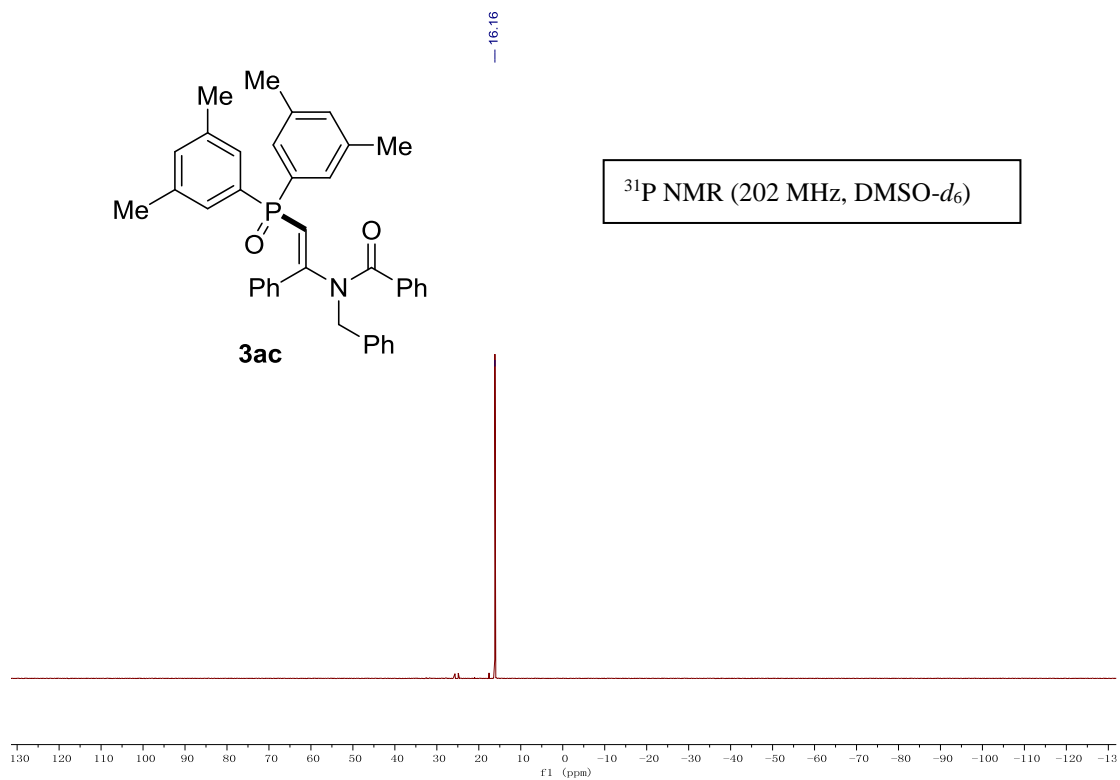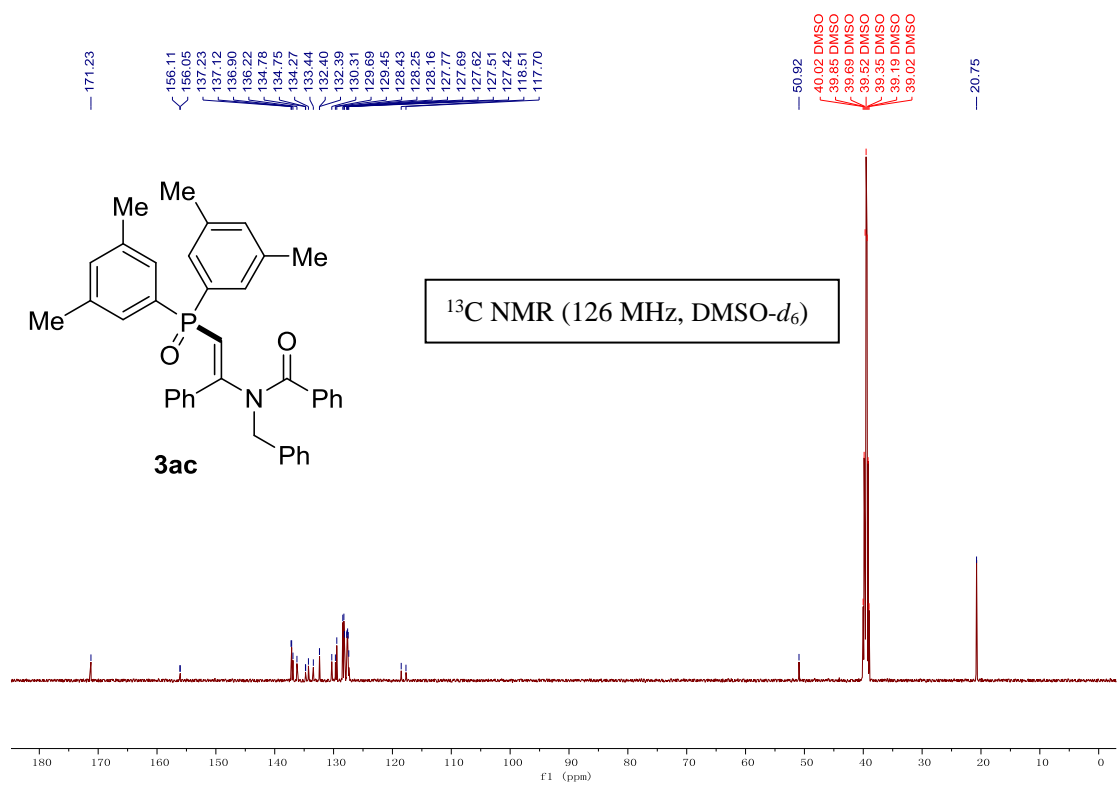

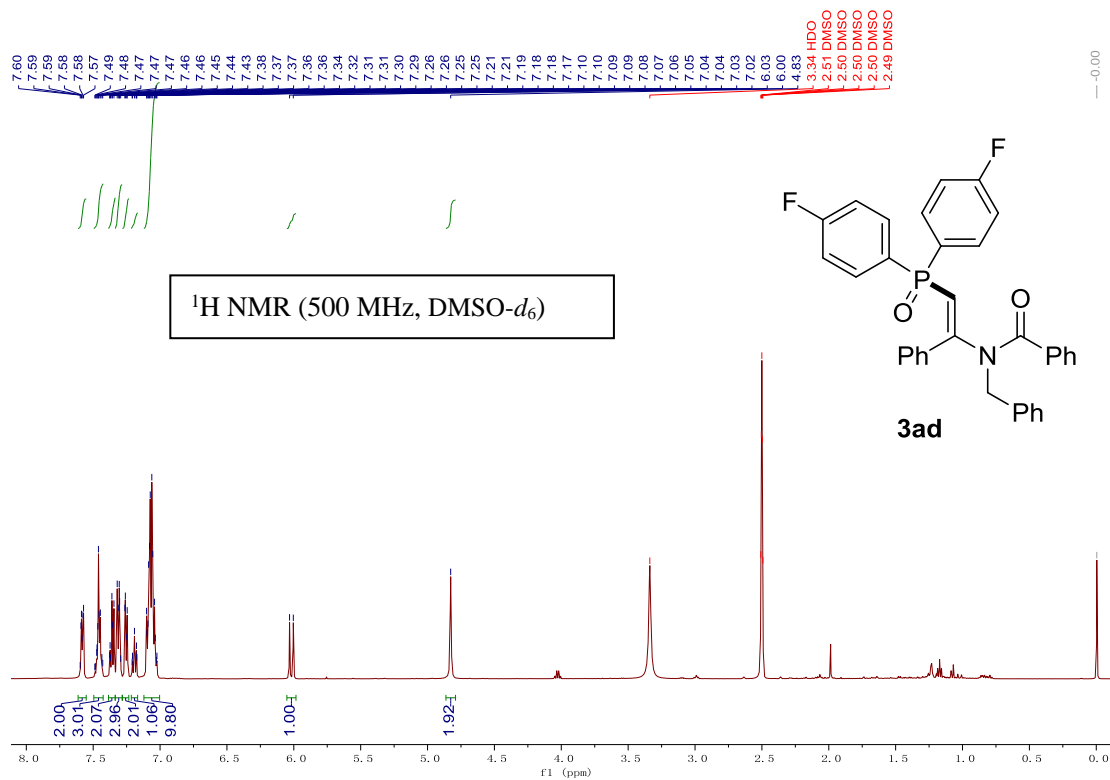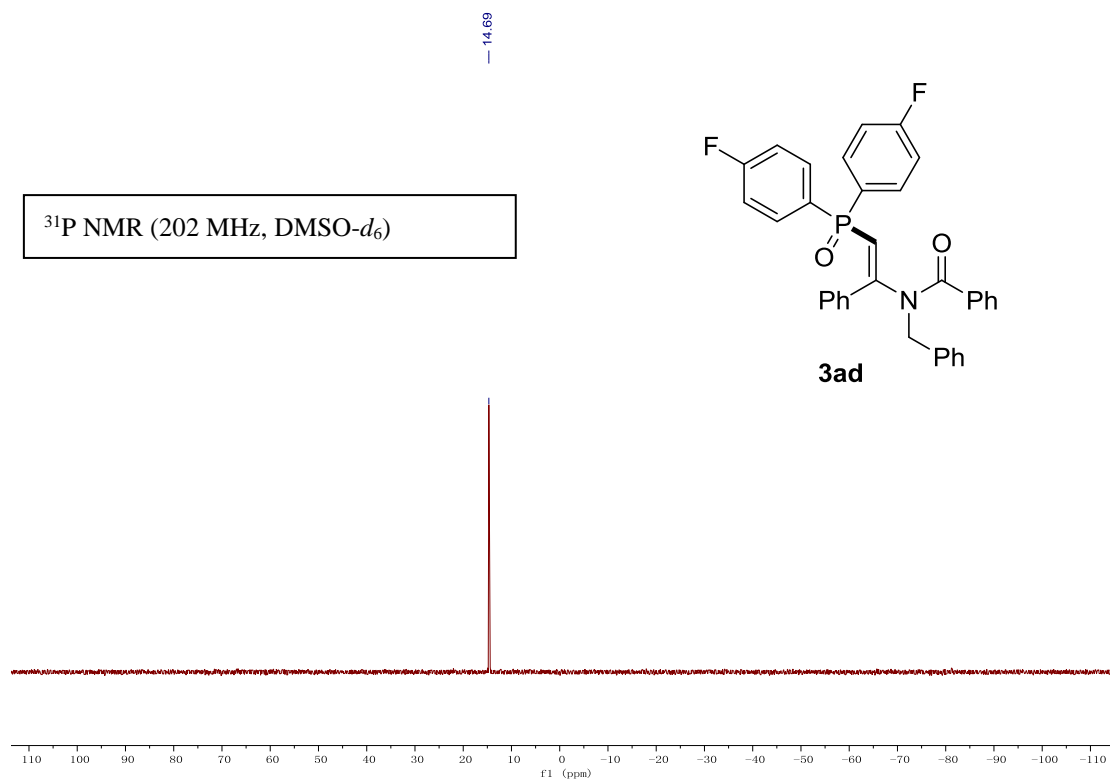

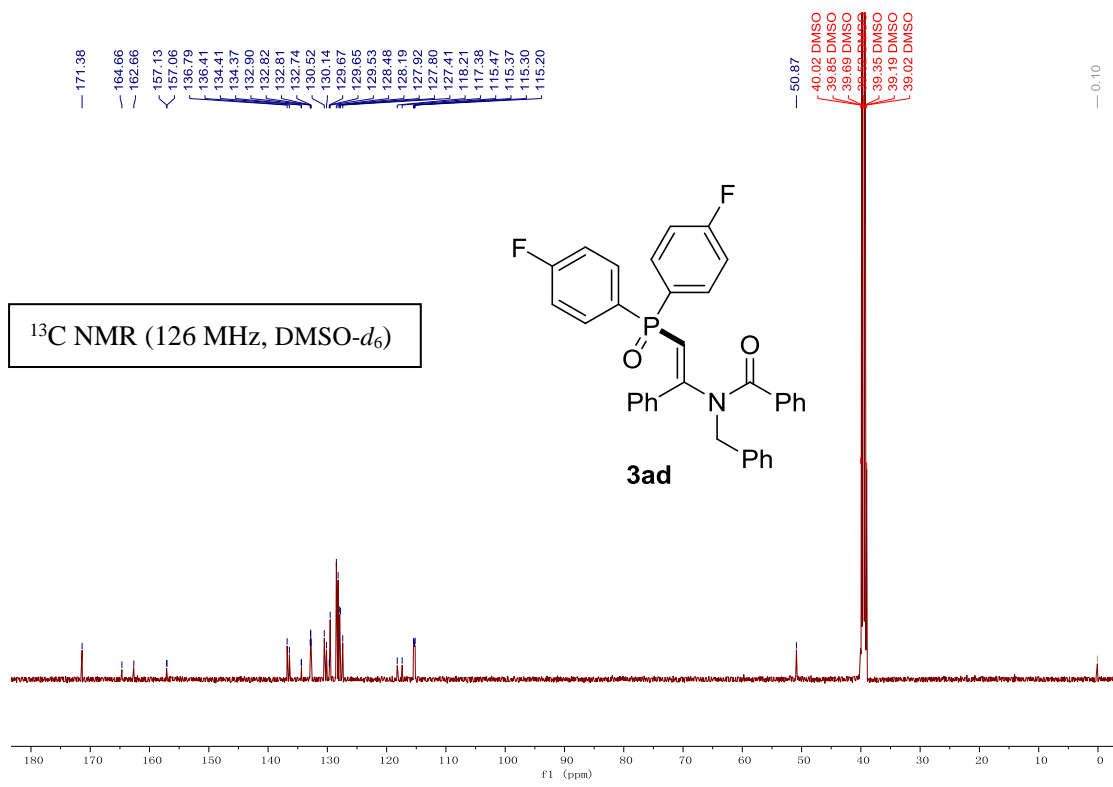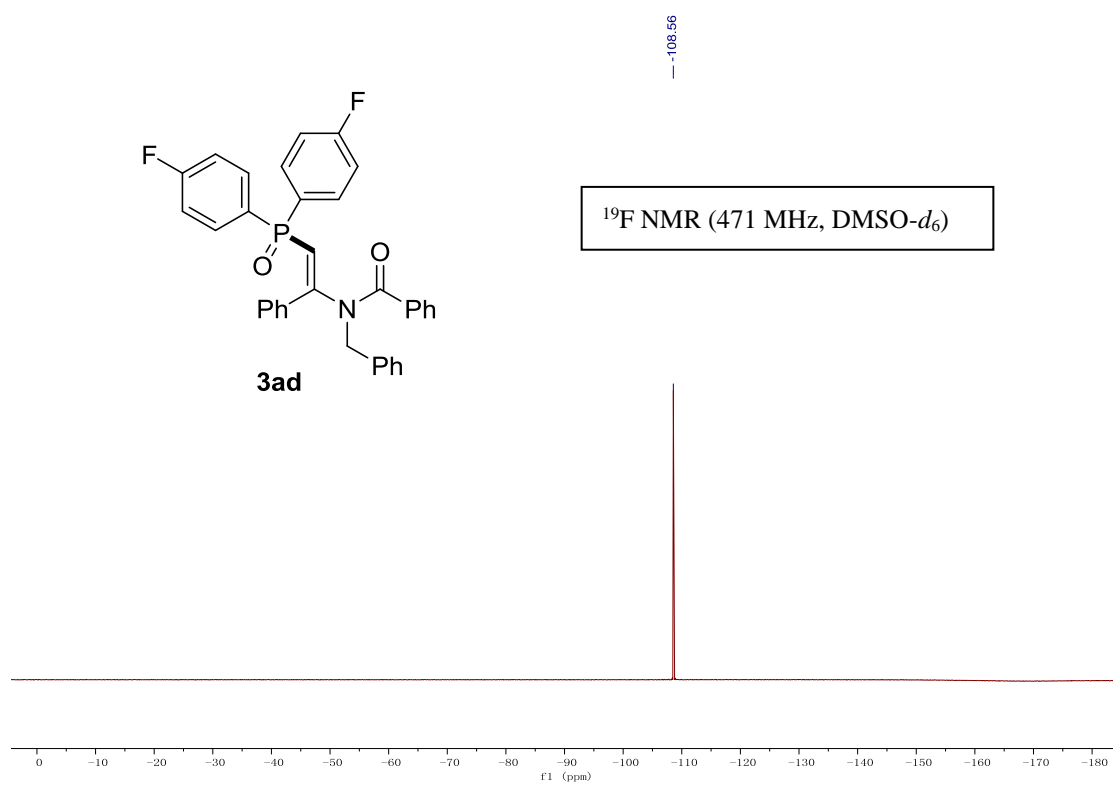

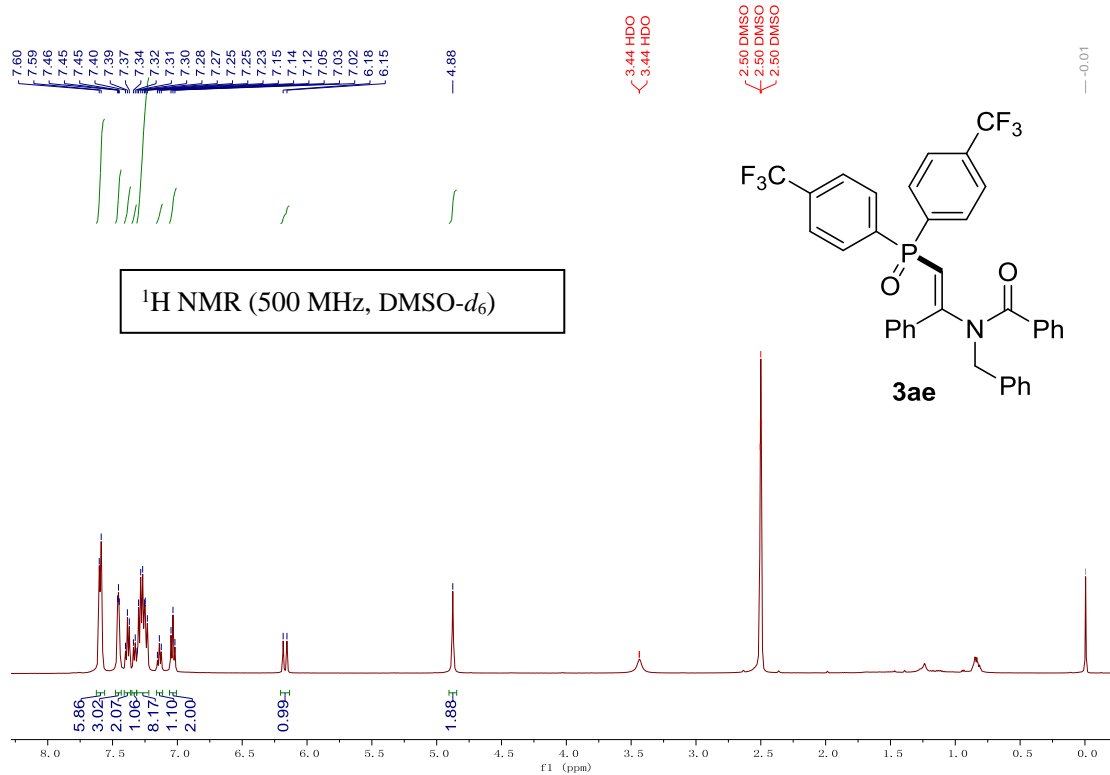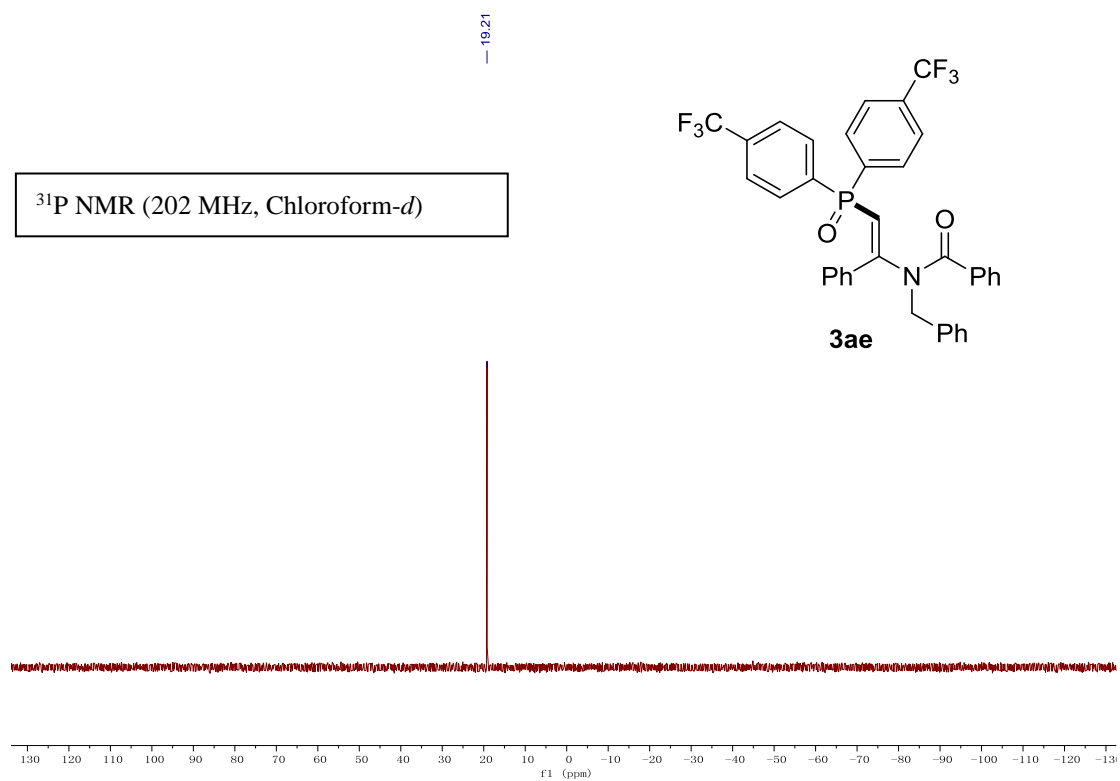



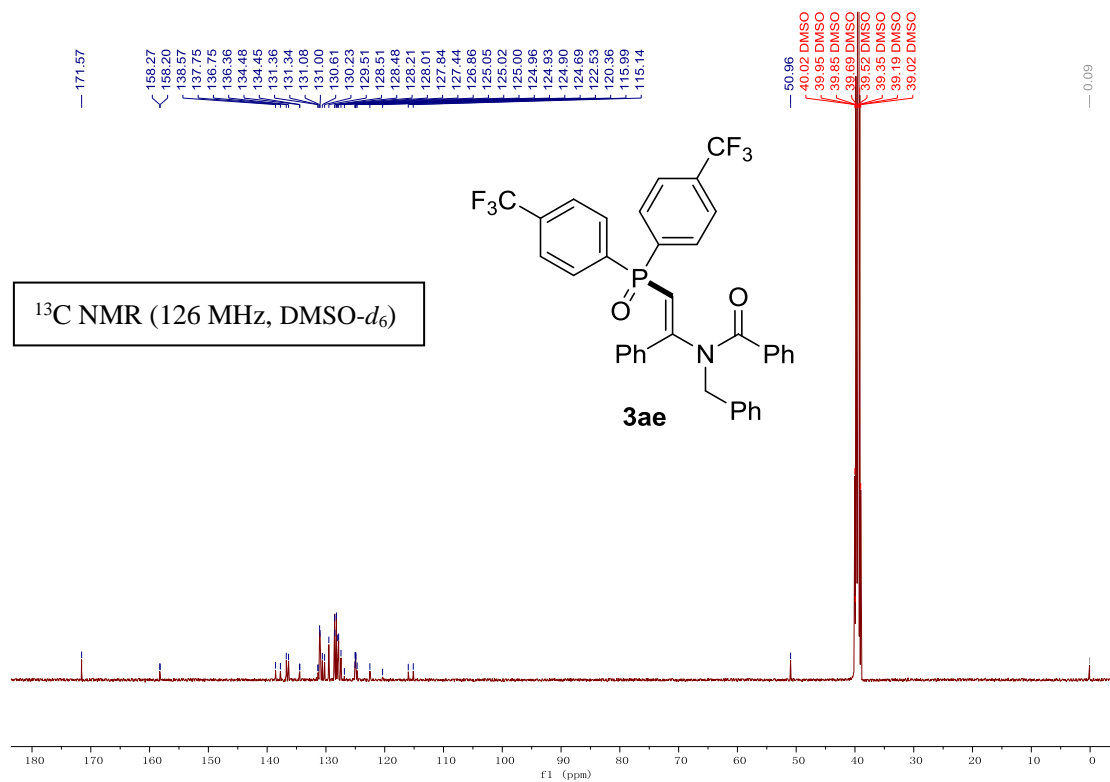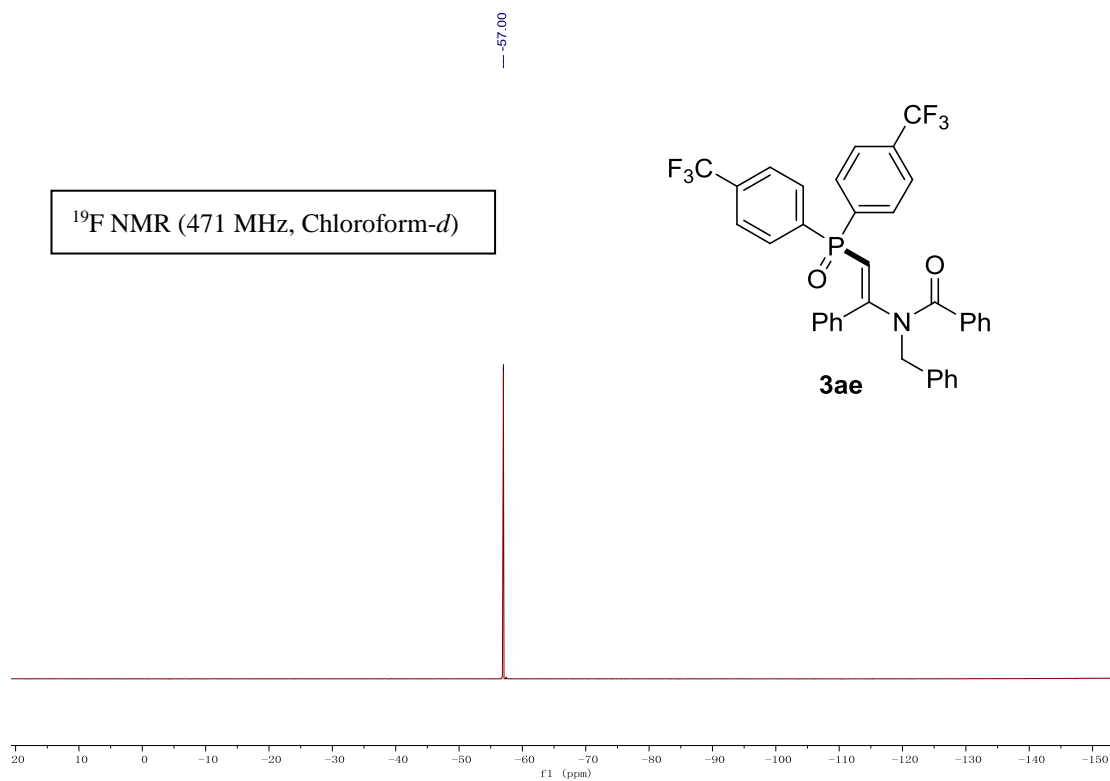

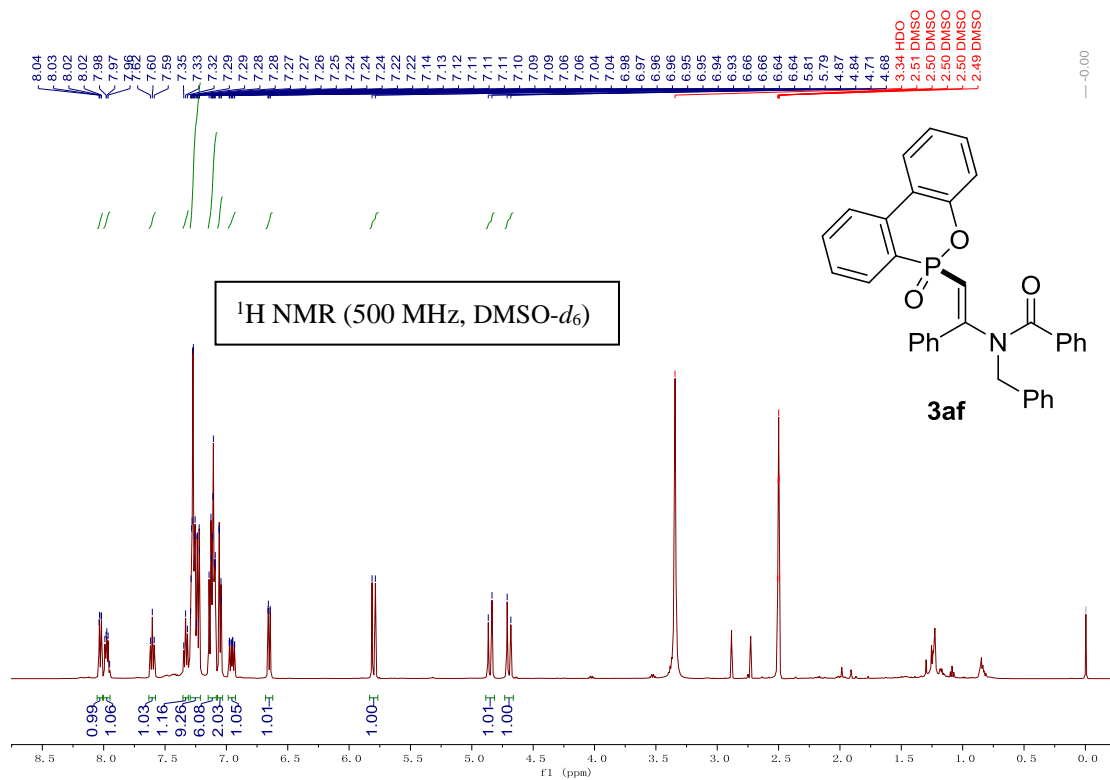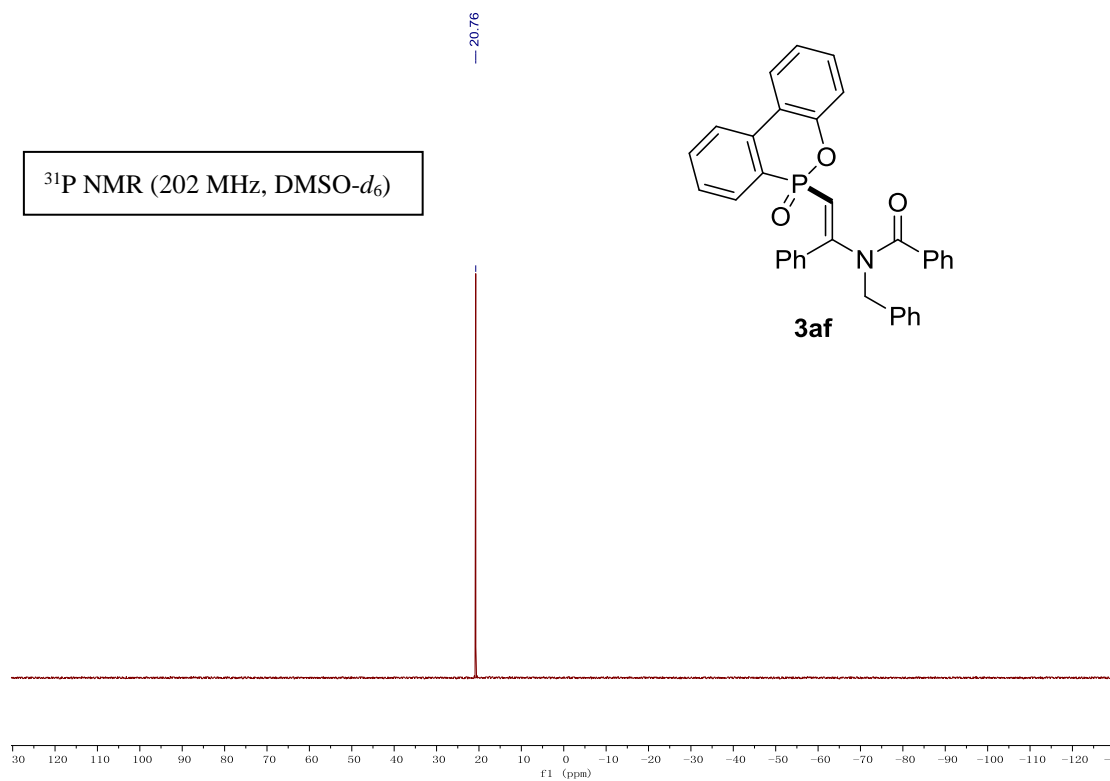

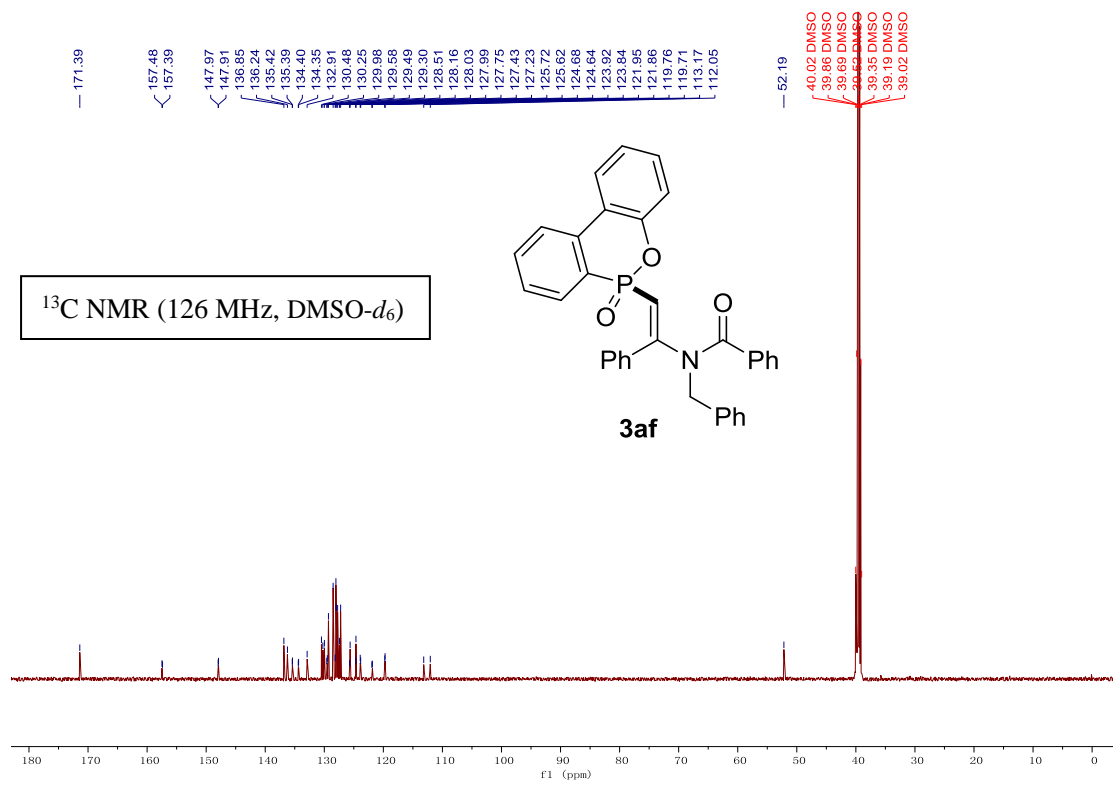

Supplement: d2ob00980c1.pdf [file d2ob00980c1.pdf]
